# Supplementary material for: Newly dated permafrost deposits and their paleo-ecological inventory reveal a much warmer-than-today Eemian in Arctic Siberia
Source: Copernicus journal article supplement (doi:10.5194/cp-2024-74), 2024-11-22
Supplement: Supplementary file 1 [file cp-2024-74-supplement.pdf]

## Supplement material

### Tables

**Table S1:** Modern occurrences of plants recovered in Krest Yuryakh deposits after GBIF and MTWA at these locations according to the updated database of [Leemans and Cramer \(1991\)](#). The minimum values for thermophilous species or, respectively, the maximum detected values for cryophytes are given, together resulting in a mutual climatic range or coexistence interval

| Taxon                                              | Occurrence in Yakutia with the highest or lowest MTWA                    | Source of the occurrence | MTWA <sub>Min</sub> [°C] | MTWA <sub>Max</sub> [°C] |
|----------------------------------------------------|--------------------------------------------------------------------------|--------------------------|--------------------------|--------------------------|
| <i>Alnus hirsuta</i>                               | 63.8 °N, 141. °8E                                                        | GBIF, 2024a              | 12.7                     | 18.4                     |
| <i>Alnus alnobetula</i> subsp. <i>fruticosa</i>    | 72.6 °N, 126.4 °E                                                        | GBIF, 2024b              | 7.5                      | 18.4                     |
| <i>Betula fruticosa</i>                            | 71.5 °N, 126.7 °E                                                        | GBIF, 2024c              | 9.1                      | 18.4                     |
| <i>Potamogeton perfoliatus</i>                     | 68.8 °N, 161.3 °E                                                        | GBIF, 2024d              | 10.3                     | 18.4                     |
| <i>Myriophyllum spicatum</i>                       | 69.0 °N, 161.6 °E                                                        | GBIF, 2024e              | 10.3                     | 18.4                     |
| <i>Larix gmelinii</i>                              | 72.3 °N, 125.8 °E                                                        | GBIF, 2024f              | 8.0                      | 18.4                     |
| <i>Betula divaricata</i>                           | 71.8 °N, 128.1°E                                                         | GBIF, 2024g              | 7.6                      | 18.4                     |
| <i>Arctostaphylos uva-ursi</i>                     | 70.7 °N, 127.3 °E                                                        | GBIF, 2024h              | 10.6                     | 18.4                     |
| <i>Moehringia lateriflora</i>                      | 70.6 °N, 147.9 °E                                                        | GBIF, 2024i              | 9.9                      | 18.4                     |
| <i>Sparganium minimum</i>                          | 69.0 °N, 161.6 °E                                                        | GBIF, 2024j              | 10.3                     | 18                       |
| <i>Cherleria arctica</i>                           | 73.5 °N, 142.0 °E;<br>63.9 °N, 131.8 °E                                  | GBIF, 2024k              | 3.3                      | 13.3                     |
| <i>Coptidium lapponicum</i>                        | 73.5 °N, 142.0 °E<br>62.1 °N, 129.8 °E                                   | GBIF, 2024l              | 3.5                      | 18.4                     |
| <i>Silene involucrata</i>                          | 73.5 °N, 142.0 °E<br>66.8 °N, 123.3 °E                                   | GBIF, 2024m              | 3.3                      | 15.7                     |
| <i>Sagina nivalis</i>                              | 75.5 °N, 138.8 °E<br>69.7 °N, 135.1 °E                                   | GBIF, 2024n              | 2.6                      | 12.9                     |
| <i>Potentilla hyparctica</i>                       | 75.5 °N, 138.8 °E<br>66.0 °N, 126.2 °E                                   | GBIF, 2024o              | 2.6                      | 14.6                     |
| <i>Ranunculus nivalis</i>                          | 75.5 °N, 143.9 °E<br>64.5 °N, 109.6 °E                                   | GBIF, 2024p              | 1.6                      | 15.3                     |
| Coexistence interval MTWA [°C] Bol'shoy Lyakhovsky | Minimum of <i>Sparganium minimum</i><br>Maximum of <i>Sagina nivalis</i> |                          | 10.3                     | 12.9                     |
| Coexistence interval MTWA [°C] Oyogos Yar          | Minimum of <i>Alnus hirsuta</i><br>Maximum of <i>Ranunculus nivalis</i>  |                          | 12.7                     | 15.3                     |

GBIF, 2024a. <https://www.gbif.org/occurrence/2570528215>

GBIF, 2024b. <https://www.gbif.org/occurrence/3004116521>

GBIF, 2024c. <https://www.gbif.org/occurrence/2570527169>

GBIF, 2024d. <https://www.gbif.org/occurrence/3467615661>

GBIF, 2024e. <https://www.gbif.org/occurrence/3496990363>

GBIF, 2024f. <https://www.gbif.org/occurrence/1697158965>

GBIF, 2024g. <https://www.gbif.org/occurrence/3464847162>

GBIF, 2024h. <https://www.gbif.org/occurrence/3467619303>

GBIF, 2024i. <https://www.gbif.org/occurrence/3465025758>

GBIF, 2024j. <https://www.gbif.org/occurrence/3496988350>

GBIF, 2024k. <https://www.gbif.org/occurrence/3464890601>; <https://www.gbif.org/occurrence/3710512588>

GBIF, 2024l. <https://www.gbif.org/occurrence/3465027647>; <https://www.gbif.org/occurrence/1697230123>

GBIF, 2024m. <https://www.gbif.org/occurrence/3464892630>; <https://www.gbif.org/occurrence/1697223244>

GBIF, 2024n. <https://www.gbif.org/occurrence/3465037654>; <https://www.gbif.org/occurrence/3467613504>

GBIF, 2024o. <https://www.gbif.org/occurrence/3464890595>; <https://www.gbif.org/occurrence/3710506639>

GBIF, 2024p. <https://www.gbif.org/occurrence/2570552746>; <https://www.gbif.org/occurrence/2570552150>

**Table S2:** Plant macro remain taxa from both coasts

| Plant communities (syntaxa)                                                                                                                                                | Plant taxa                                                   | Present at Bol'shoj Lyakhovsky | Present at Oyogos Yar |
|----------------------------------------------------------------------------------------------------------------------------------------------------------------------------|--------------------------------------------------------------|--------------------------------|-----------------------|
| dry variant<br><br>Forests & forest tundra (Betulo-Adenostyletea BR.-BL. & R.TX. 1943; Vaccinio-Piceetea BR.-BL. 1939; Epilobietea angustifolii R.TX. & PRSG.EX V. ROCHOW) | <i>Arctostaphylos uva-ursi</i> (L.) SPRENG.                  |                                | X                     |
|                                                                                                                                                                            | <i>Moehringia laterifolia</i> (L.) FENZL                     | X                              | X                     |
|                                                                                                                                                                            | <i>Stellaria longifolia</i> MUEHL. EX WILLD.                 |                                | X                     |
|                                                                                                                                                                            | <i>Chamaenerion angustifolium</i> (L.) SCOP.                 |                                | X                     |
|                                                                                                                                                                            | <i>Larix gmelinii</i> (RUPR.) KUZEN.                         |                                | X                     |
|                                                                                                                                                                            | <i>Pinaceae</i> <i>indet.</i>                                |                                | X                     |
|                                                                                                                                                                            | <i>Alnus hirsuta</i> Turcz.                                  |                                | X                     |
|                                                                                                                                                                            | <i>Alnus alnobetula</i> subsp. <i>fruticosa</i> (RUPR.) RAUS | X                              | X                     |
|                                                                                                                                                                            | <i>Boschniakia rossica</i> (CHAM. & SCHLECHT.) B. FEDTSCH.   | X                              |                       |
|                                                                                                                                                                            | <i>Betula</i> cf. <i>pendula</i> ROTH                        |                                | X                     |
|                                                                                                                                                                            | <i>Betula divaricata</i> LEDEB.                              |                                | X                     |
|                                                                                                                                                                            | <i>Betula fruticosa</i> PALL.                                | X                              | X                     |
|                                                                                                                                                                            | <i>Betula nana</i> L. s.l.                                   | X                              | X                     |
|                                                                                                                                                                            | <i>Betula</i> sp. L.                                         | X                              | X                     |
| <i>Betulaceae</i> <i>indet.</i>                                                                                                                                            | X                                                            | X                              |                       |
| wet variant, associated to bogs                                                                                                                                            | <i>Vaccinium vitis-idaea</i> L.                              | X                              | X                     |
|                                                                                                                                                                            | <i>Andromeda polifolia</i> L.                                |                                | X                     |
|                                                                                                                                                                            | <i>Empetrum nigrum</i> L.                                    | X                              |                       |
|                                                                                                                                                                            | <i>Rhododendron tomentosum</i> (STOKES) HARMAJA              | X                              |                       |
|                                                                                                                                                                            | <i>Chamaedaphne calyculata</i> MOENCH                        |                                | X                     |
|                                                                                                                                                                            | <i>Ranunculus lapponicus</i> L.                              | X                              | X                     |
| Wetland & riparian vegetation (Oxycocco-Sphagnetetea Br.-Bl. & R.Tx. 1943; Scheuchzerio caricetea nigrae (NORDH. 1936) R.TX. 1937)                                         | <i>Chrysosplenium alternifolium</i> L.                       | X                              | X                     |
|                                                                                                                                                                            | <i>Micranthes hieracifolia</i> (WALDST. & KIT.) HAW.         |                                | X                     |
|                                                                                                                                                                            | <i>Carex lugens</i> H.T. HOLM                                |                                | X                     |
|                                                                                                                                                                            | <i>Carex aquatilis</i> WAHLENB.                              | X                              | X                     |
|                                                                                                                                                                            | <i>Carex</i> sect. <i>Phacocystis</i> DUMORT.                | X                              | X                     |
|                                                                                                                                                                            | <i>Eriophorum scheuchzeri</i> HOPPE                          | X                              | X                     |
|                                                                                                                                                                            | <i>Eriophorum brachyantherum</i> TRAUTV. ET C.A. MEY         | X                              | X                     |
| <i>Eriophorum russeolum</i> FRIES                                                                                                                                          |                                                              | X                              |                       |

|  |                                                                            |                                                                            |   |   |
|--|----------------------------------------------------------------------------|----------------------------------------------------------------------------|---|---|
|  |                                                                            | <i>Eriophorum cf. gracile</i> KOCH                                         | X |   |
|  |                                                                            | <i>Eriophorum angustifolium</i> HONCK.                                     | X | X |
|  |                                                                            | <i>Caltha palustris</i> L.                                                 | X | X |
|  |                                                                            | <i>Carex parallela</i> subsp. <i>redowskiana</i> (C.A.MEY.)<br>T.V.EGOROVA |   | X |
|  |                                                                            | <i>Comarum palustre</i> L.                                                 | X | X |
|  |                                                                            | <i>Silene violascens</i> (TOLM.) V.V.PETROVSKY & ELVEN                     | X |   |
|  |                                                                            | <i>Parnassia palustris</i> L.                                              | X |   |
|  |                                                                            | <i>Epilobium davuricum</i> L.                                              | X |   |
|  |                                                                            | <i>Epilobium palustre</i> L.                                               | X | X |
|  |                                                                            | <i>Sparganium hyperboreum</i> LAEST.                                       | X | X |
|  |                                                                            | <i>Sparganium minimum</i> HILL                                             | X |   |
|  |                                                                            | <i>Menyanthes trifoliata</i> L.                                            | X |   |
|  | Aquatic vegetation<br>(Potamogetonetea<br>pectinati R. TX. & PRSG<br>1942) | <i>Nitella</i> sp.                                                         | X |   |
|  |                                                                            | <i>Hippuris vulgaris</i> L.                                                | X | X |
|  |                                                                            | <i>Myriophyllum spicatum</i> L.                                            |   | X |
|  |                                                                            | <i>Batrachium</i> sp. (DC.) S.F. GRAY                                      | X | X |
|  |                                                                            | <i>Callitriche hermaphroditica</i> L.                                      | X | X |
|  |                                                                            | <i>Potamogeton perfoliatus</i> L.                                          |   | X |
|  |                                                                            | <i>Stuckenia filiformis</i> (PERS.) BÖRNER                                 |   | X |
|  |                                                                            | <i>Stuckenia vaginata</i> (MAGNIN) HOLUB                                   | X | X |
|  |                                                                            | <i>Potamogeton</i> sp. L.                                                  |   | X |
|  |                                                                            | <i>Ranunculus hyperboreus</i> ROTTB./ <i>gmelinii</i> DC.                  | X | X |

| Plant communities<br>(syntaxa)                                                                                              | Plant taxa                                                | Present at<br>BLI | Present at<br>Oyogos Yar |
|-----------------------------------------------------------------------------------------------------------------------------|-----------------------------------------------------------|-------------------|--------------------------|
|                                                                                                                             | <i>Ranunculus hyperboreus</i> ROTTB./ <i>gmelinii</i> DC. | X                 | X                        |
| (halophytic)<br>pioneers of lake<br>littoral ( <i>Bidentetea</i><br><i>tripartitae</i> R. TX. ET<br>AL. AP. R. TX.<br>1950) | <i>Rorippa palustris</i> (L.) BESSER                      | X                 |                          |
|                                                                                                                             | <i>Tephroseria palustris</i> (L.) REICHENB.               | X                 | X                        |
|                                                                                                                             | <i>Rumex maritimus</i> L.                                 | X                 |                          |
|                                                                                                                             | <i>Chenopodium</i> sp. L.                                 |                   | X                        |
|                                                                                                                             | <i>Chenopodium cf. glaucum</i> L.                         |                   | X                        |
|                                                                                                                             | <i>Stellaria crassifolia</i> EHRH.                        | X                 |                          |

|                                                                                                                                    |                                                                  |                                                                       |   |   |
|------------------------------------------------------------------------------------------------------------------------------------|------------------------------------------------------------------|-----------------------------------------------------------------------|---|---|
|                                                                                                                                    |                                                                  | <i>Spergularia salina</i> J. ET C. PRESL.                             |   | X |
|                                                                                                                                    |                                                                  | <i>Tripleurospermum hookeri</i> SCH.BIP.                              | X |   |
|                                                                                                                                    |                                                                  | <i>Eleocharis palustris</i> (L.) ROEM. ET SCHULT.                     |   | X |
| mesic grassland<br>vegetation (Asteretea<br>tripolii Westh. et Beeft.<br>In Beeft. 1965; Molinio-<br>Arrhenateretea R.TX.<br>1937) |                                                                  | <i>Puccinellia</i> sp. PARL.                                          | X | X |
|                                                                                                                                    |                                                                  | <i>Alopecurus</i> cf. <i>pratensis</i> L.                             | X | X |
|                                                                                                                                    |                                                                  | <i>Deschampsia</i> sp. BEAUV.                                         | X | X |
|                                                                                                                                    |                                                                  | <i>Arctagrostis latifolia</i> (R.BR.) GRISEB.                         |   | X |
|                                                                                                                                    |                                                                  | <i>Rumex arcticus</i> TRAUTV.                                         | X | X |
|                                                                                                                                    |                                                                  | <i>Equisetum arvense</i> L.                                           |   | X |
|                                                                                                                                    |                                                                  | <i>Ranunculus propinquus</i> s.l. C.A.MEY.                            | X |   |
|                                                                                                                                    |                                                                  | <i>Calamagrostis</i> sp. ADANS.                                       | X | X |
|                                                                                                                                    |                                                                  | <i>Allium</i> cf. <i>schoenoprasum</i> L.                             |   | X |
|                                                                                                                                    |                                                                  | <i>Poa</i> sp. L.                                                     | X | X |
|                                                                                                                                    | <i>Festuca</i> sp. L.                                            |                                                                       | X |   |
| Steppes (Koelerio-<br>Corynepherea<br>Klika & Nowak<br>1941, Festuco-<br>Brometea BR.-BL.<br>& R.TX. 1943)                         |                                                                  | <i>Rumex acetosella</i> L. <i>s.l.</i>                                | X | X |
|                                                                                                                                    |                                                                  | <i>Carex duriuscula</i> C.A. MEY                                      | X | X |
|                                                                                                                                    |                                                                  | <i>Eritrichium sericeum</i> (LEHM.) A.DC.                             |   | X |
|                                                                                                                                    |                                                                  | <i>Carex supina</i> var. <i>spaniocarpa</i> (STEUD.) B.BOIVIN         | X | X |
|                                                                                                                                    |                                                                  | <i>Alyssum</i> cf. <i>obovatum</i> (C.A. MEY) TURCZ.                  |   | X |
|                                                                                                                                    |                                                                  | Asteraceae cf. <i>Achillea</i> L. / <i>Ptarmica</i> HILL              |   | X |
| Tundra steppes (Carici<br>rupestris- Kobresietea<br>bellardii OHBA 1974)                                                           |                                                                  | <i>Potentilla stipularis</i> L.                                       | X | X |
|                                                                                                                                    |                                                                  | <i>Androsace septentrionalis</i> L.                                   | X |   |
|                                                                                                                                    |                                                                  | <i>Potentilla</i> cf. <i>arenosa</i> (TURCZ.) JUZ.                    | X |   |
|                                                                                                                                    |                                                                  | <i>Artemisia</i> sp. L.                                               | X | X |
|                                                                                                                                    |                                                                  | <i>Potentilla nivea</i> L.                                            | X | X |
|                                                                                                                                    |                                                                  | <i>Ranunculus pedatifidus</i> var. <i>affinis</i> (R.Br.) L.D. BENSON | X | X |
|                                                                                                                                    |                                                                  | <i>Rhododendron</i> sp. L.                                            | X | X |
|                                                                                                                                    |                                                                  | <i>Carex myosuroides</i> VILL.                                        | X | X |
|                                                                                                                                    |                                                                  | <i>Dryas octopetala</i> <i>s.l.</i> (JUZ.) HULT.                      | X | X |
|                                                                                                                                    |                                                                  | <i>Gagea serotina</i> (L.) KER GAWL.                                  | X |   |
|                                                                                                                                    | <i>Physaria arctica</i> (WORMSK. EX HORNEM.) O'KANE & AL-SHEHBAZ | X                                                                     |   |   |

|  |                                                                               |                                                                |   |   |
|--|-------------------------------------------------------------------------------|----------------------------------------------------------------|---|---|
|  |                                                                               | <i>Silene involucrata</i> (CHAM. & SCHLTDL.) BOCQUET           | X | X |
|  |                                                                               | <i>Cherleria arctica</i> (STEVEN EX SER.) A.J.MOORE & DILLENB. | X |   |
|  |                                                                               | <i>Bistorta vivipara</i> (L.) S.F.GRAY                         | X |   |
|  |                                                                               | <i>Saxifraga</i> cf. <i>oppositifolia</i> L.                   |   | X |
|  | Arctic (and alpine) pioneer vegetation (Thaspitaea rotundifolia BR.-BL. 1948) | <i>Stellaria longipes</i> GOLDIE s.l.                          | X | X |
|  |                                                                               | <i>Cerastium beeringianum</i> CHAM. ET SCHLECHT.               | X | X |
|  |                                                                               | <i>Cerastium</i> cf. <i>jenissejense</i> HULT.                 | X |   |
|  |                                                                               | <i>Draba</i> sp. L.                                            | X | X |
|  |                                                                               | <i>Papaver Sect. Scapiflora</i> RCHB.                          | X | X |
|  |                                                                               | <i>Sabulina rubella</i> (WAHLENB.) DILLENB. & KADEREIT         | X | X |
|  |                                                                               | <i>Chamaenerion latifolium</i> (L.) TH. FRIES                  |   | X |
|  |                                                                               | cf. <i>Descurainia sophioides</i> O.E. SCHULZ                  | X | X |
|  | Snow bed vegetation (Salicitea herbaceae BR.-BL. 1947)                        | <i>Eutrema edwardsii</i> R.Br.                                 | X |   |
|  |                                                                               | <i>Potentilla</i> cf. <i>hyparctica</i> Malte                  | X |   |
|  |                                                                               | <i>Sagina nivalis</i> (LINDBLOM) FR.                           | X |   |
|  |                                                                               | <i>Luzula confusa</i> LINDEB.                                  | X | X |
|  |                                                                               | <i>Luzula wahlenbergii</i> RUPR.                               | X | X |
|  | Snow bed vegetation (Salicitea herbaceae BR.-BL. 1947)                        | <i>Ranunculus nivalis</i> L.                                   |   | X |
|  |                                                                               | <i>Juncus biglumis</i> L.                                      | X | X |
|  |                                                                               | <i>Salix</i> sp. L.                                            | X | X |
|  | Without indication                                                            | <i>Asteraceae</i> indet.                                       | X | X |
|  |                                                                               | <i>Poaceae</i> indet.                                          | X | X |
|  |                                                                               | <i>Carex</i> indet. <i>tricarpellata</i>                       | X | X |
|  |                                                                               | cf. <i>Corydalis</i> sp.                                       | X |   |

**Table S3:** GDGT proxy data for core L14-04.

| Altitude (m) | BIT  | Ri/b | GDGT-1+3/(GDGT-1+cren) | Air GST |
|--------------|------|------|------------------------|---------|
| 11.6         | 1.00 | 0.02 | 0.39                   | 0.9     |
| 11.3         | 1.00 | 0.01 | 0.61                   | 2.1     |
| 11.0         | 1.00 | 0.00 | 0.72                   | 1.7     |
| 10.5         | 1.00 | 0.01 | 0.32                   | 2.4     |
| 9.6          | 1.00 | 0.01 | 0.86                   | 1.0     |
| 8.1          | 1.00 | 0.02 | 0.27                   | 0.8     |
| 6.7          | 0.98 | 0.09 | 0.33                   | -0.1    |

**Table S4:** Number of species, number of individuals, and Menhinick index ( $D_{Mn}$ ) (Menhinick, 1964) of fossil beetle assemblages in different stratigraphic units

| Unit                              | Number of samples (S) | Number of species (N) | Number of individuals | $D_{Mn}$ |
|-----------------------------------|-----------------------|-----------------------|-----------------------|----------|
| Late Holocene flood plain (MIS 1) | 3                     | 53                    | 453                   | 2.49     |
| Holocene thermokarst (MIS 1)      | 2                     | 55                    | 380                   | 2.82     |
| Yedoma Ice Complex (MIS 3-2)      | 7                     | 33                    | 306                   | 1.89     |
| Krest Yuryakh (MIS 5e)            | 4                     | 91                    | 588                   | 3.75     |
| Yukagir and Kuchchugui (MIS 7-6)  | 14                    | 39                    | 366                   | 2.04     |

Reference

Menhinick, E.F. (1964). A comparison of some species-individuals diversity indices applied to samples of field insects. *Ecology*, 45, 859–861. <https://doi.org/10.2307/1934933>

**Table S5:** Insects from MIS 5 samples from the DLS area (aq. – aquatic, ri – riparian, - xe – xerophilous, dt - dry tundra, ms – meadow steppe, mt - mesic tundra, fo -forest zone, pl – plant litter, ss – sedge (cryoxerophilous) steppe, oth - others, sh - shrubs, st - steppe, ar – arctic tundra).

| taxa                                               | eco | L-11-B17 | R-22-B15 | R-22-B16 | L-11-B19 | Oya-6 |
|----------------------------------------------------|-----|----------|----------|----------|----------|-------|
| <b>Subphylum Hexapoda, Class Insecta</b>           |     |          |          |          |          |       |
| <b>Ord. Coleoptera</b>                             |     |          |          |          |          |       |
| <b>Fam. Gyrinidae</b>                              |     |          |          |          |          |       |
| <i>Gyrinus opacus</i> Sahlb.                       | aq  | 1        | 0        | 0        | 0        | 0     |
| <b>Fam. Carabidae</b>                              |     |          |          |          |          |       |
| Subfam. Nebriinae                                  |     |          |          |          |          |       |
| <i>Nebria frigida</i> Sahlb.                       | ri  | 2        | 0        | 0        | 0        | 0     |
| <i>Notiophilus aquaticus</i> L.                    | xe  | 3        | 2        | 1        | 2        | 0     |
| <i>Pelophila borealis</i> (Payk.)                  | ri  | 1        | 0        | 0        | 0        | 0     |
| Subfam. Carabinae                                  |     |          |          |          |          |       |
| <i>Carabus shilenkovi</i> O.Berlov                 | dt  | 3        | 1        | 1        | 0        | 0     |
| <i>C. kolymensis</i> Kryzh. et Bud.                | ms  | 0        | 0        | 0        | 1        | 0     |
| Subfam. Elaphrinae                                 |     |          |          |          |          |       |
| <i>Blethisa catenaria</i> Brown                    | mt  | 0        | 0        | 0        | 1        | 0     |
| <i>Diacheila polita</i> (Fald.)                    | mt  | 3        | 2        | 2        | 0        | 0     |
| <i>Elaphrus riparius</i> L.                        | ri  | 1        | 0        | 0        | 0        | 0     |
| <i>E. lapponicus</i> Gyll.                         | ri  | 0        | 0        | 0        | 1        | 0     |
| Subfam. Trechinae                                  |     |          |          |          |          |       |
| <i>Bembidion (Asioperyphus) umiatense</i> Lindrth. | ri  | 6        | 0        | 2        | 2        | 0     |
| <i>B. (Peryphanes) grapii</i> Gyll.                | dt  | 2        | 1        | 0        | 1        | 0     |
| <i>B. (Peryphanes) dauricum</i> Motsch.            | dt  | 0        | 0        | 0        | 1        | 0     |
| <i>B. (Plataphus) hyperboreaorum</i> Munch         | ri  | 0        | 0        | 0        | 1        | 0     |
| <i>B. (Notaphus) varium</i> (Ol.)                  | ri  | 0        | 0        | 0        | 0        | 1     |
| Subfam. Harpalinae                                 |     |          |          |          |          |       |
| <i>Dicheirotichus mannerheimii</i> (Sahlb.)        | dt  | 1        | 2        | 2        | 0        | 0     |
| <i>Harpalus vittatus kiselevi</i> Kat. et Shil.    | ms  | 2        | 0        | 1        | 0        | 0     |
| <i>H. vittatus vittatus</i> Gebl.                  | ms  | 2        | 0        | 0        | 0        | 0     |
| <i>H. amputatus amputatoides</i> Mlynar            | ms  | 0        | 0        | 0        | 0        | 1     |
| <i>Cymindis arctica</i> Kryzh. et Em.              | st  | 0        | 3        | 0        | 0        | 0     |
| <i>Agonum (Agonothorax) impressum</i> Panz.        | ri  | 2        | 1        | 0        | 0        | 0     |
| <i>Sericoda quadripunctata</i> (DeG)               | ri  | 0        | 1        | 0        | 0        | 0     |
| <i>Poecilus (Derus) nearcticus</i> Lindrth.        | dt  | 3        | 2        | 0        | 0        | 0     |



|                                                   |    |    |    |    |   |   |
|---------------------------------------------------|----|----|----|----|---|---|
| <i>Pterostichus (Cryobius) brevicornis</i> (Kby.) | mt | 24 | 20 | 4  | 8 | 0 |
| <i>P. (Cryobius) nigripalpis</i> Popp.            | dt | 2  | 3  | 2  | 1 | 0 |
| <i>P. (Cryobius) pinguedineus</i> Esch.           | mt | 6  | 5  | 0  | 2 | 0 |
| <i>P. (Cryobius) ventricosus</i> Esch.            | mt | 2  | 2  | 4  | 2 | 4 |
| <i>P. (Cryobius) spp.</i>                         | mt | 14 | 3  | 4  | 5 | 0 |
| <i>P. (Lenapterus) costatus</i> Men.              | mt | 2  | 0  | 1  | 0 | 0 |
| <i>P. (Lenapterus) vermiculosus</i> Men.          | mt | 4  | 0  | 0  | 0 | 0 |
| <i>P. (Tundraphilus) sublaevis</i> Sahlb.         | dt | 3  | 0  | 2  | 2 | 2 |
| <i>P. (Lenapterus) agonus</i> Horn.               | mt | 0  | 3  | 0  | 0 | 0 |
| <i>P. (Lenapterus) vermiculosus</i> Men.          | mt | 0  | 0  | 0  | 1 | 0 |
| <i>P. (Petrophilus) eximius</i> Mor.              | dt | 0  | 1  | 0  | 0 | 0 |
| <i>P. (Petrophilus) magus</i> Mann.               | fo | 0  | 0  | 0  | 1 | 0 |
| <i>P. (Petrophilus) montanus</i> (Motsch.)        | dt | 0  | 0  | 0  | 1 | 0 |
| <i>P. (Petrophilus) tundrae</i> Tschitsch.        | dt | 0  | 0  | 0  | 1 | 0 |
| <i>Stereocerus haematopus</i> (Dej.)              | dt | 3  | 3  | 0  | 0 | 0 |
| <i>Amara (Amarocelia) interstitialis</i> Dej.     | dt | 0  | 1  | 0  | 1 | 0 |
| <i>A. (Curtonotus) alpina</i> Payk.               | dt | 23 | 45 | 11 | 8 | 8 |
| <i>A. (Curtonotus) bokori</i> Csiki               | dt | 0  | 0  | 0  | 0 | 1 |
| Carabidae gen. indet. (larvae heads)              | pl | 0  | 1  | 0  | 0 | 2 |
| <b>Fam. Dytiscidae</b>                            |    |    |    |    |   |   |
| Subfam. Agabinae                                  |    |    |    |    |   |   |
| <i>Agabus moestus</i> (Curt.)                     | aq | 0  | 0  | 1  | 2 | 2 |
| <i>A. thomsoni</i> (Sahlb)                        | aq | 7  | 0  | 0  | 0 | 0 |
| Subfam. Colymbetinae                              |    |    |    |    |   |   |
| <i>Colymbetes dolabratus</i> (Payk.)              | aq | 2  | 2  | 1  | 1 | 1 |
| Subfam. Hydroporinae                              |    |    |    |    |   |   |
| <i>Hydroporus fuscipennis</i> Schaum.             | aq | 6  | 0  | 0  | 0 | 0 |
| <i>H. acutangulus</i> Thoms.?                     | aq | 0  | 0  | 2  | 0 | 0 |
| <b>Fam. Hydrophilidae</b>                         |    |    |    |    |   |   |
| Subfam. Helophorinae                              |    |    |    |    |   |   |
| <i>Helophorus obscurellus</i> Popp.               | aq | 0  | 0  | 0  | 0 | 2 |
| <i>H. sibiricus</i> (Motsch.)                     | aq | 0  | 0  | 1  | 0 | 2 |
| <i>H. splendidus</i> Sahlb.                       | aq | 1  | 2  | 3  | 0 | 2 |
| Subfam. Hydrophilinae                             |    |    |    |    |   |   |
| <i>Hydrobius fuscipes</i> (L)                     | aq | 1  | 0  | 0  | 1 | 0 |
| Subfam. Sphaeridiinae                             |    |    |    |    |   |   |

|                                       |    |    |    |   |   |   |
|---------------------------------------|----|----|----|---|---|---|
| <i>Cercyon</i> sp.                    | pl | 6  | 0  | 0 | 0 | 0 |
| <b>Fam. Leiodidae</b>                 |    |    |    |   |   |   |
| Subfam. Leiodinae                     |    |    |    |   |   |   |
| <i>Anisotoma</i> sp.                  | pl | 0  | 0  | 0 | 0 | 2 |
| <i>Cyrtoplastus irregularis</i> Rtt.  | pl | 2  | 0  | 0 | 0 | 1 |
| Subfam. Coloninae                     |    |    |    |   |   |   |
| <i>Colon</i> sp.                      | pl | 1  | 0  | 0 | 0 | 1 |
| Subfam. Cholevinae                    |    |    |    |   |   |   |
| <i>Cholevinus sibiricus</i> (Jean.)   | mt | 5  | 4  | 4 | 1 | 5 |
| <i>Cholevinus</i> sp.                 | pl | 0  | 0  | 0 | 0 | 2 |
| <b>Fam. Staphylinidae</b>             |    |    |    |   |   |   |
| Subfam. Omaliinae                     |    |    |    |   |   |   |
| <i>Eucnecosum tenue</i> (LeC.)        | pl | 3  | 1  | 1 | 0 | 2 |
| <i>Olophrum consimile</i> Gyll.       | mt | 16 | 3  | 4 | 6 | 0 |
| Subfam. Tachyporinae                  |    |    |    |   |   |   |
| <i>Tachinus arcticus</i> Motsch.      | mt | 10 | 24 | 9 | 1 | 1 |
| <i>T. brevipennis</i> Sahlb.          | mt | 0  | 0  | 0 | 0 | 6 |
| <i>Tachyporus</i> sp.                 | pl | 0  | 1  | 0 | 1 | 0 |
| Subfam. Aleocharinae                  |    |    |    |   |   |   |
| <i>Gymnusa</i> sp.                    | pl | 0  | 0  | 0 | 0 | 1 |
| Subfam. Steninae                      |    |    |    |   |   |   |
| <i>Stenus</i> sp.                     | ri | 1  | 0  | 0 | 1 | 1 |
| Subfam. Paederinae                    |    |    |    |   |   |   |
| <i>Lathrobium longulum</i> Grav.?     | pl | 0  | 0  | 0 | 0 | 1 |
| <i>Lathrobium</i> sp.                 | pl | 2  | 1  | 0 | 1 | 0 |
| Subfam. Staphylininae                 |    |    |    |   |   |   |
| <i>Quedius</i> sp.                    | pl | 1  | 0  | 0 | 1 | 0 |
| Staphylinidae gen. indet.             | pl | 1  | 0  | 1 | 1 | 0 |
| <b>Fam. Scarabaeidae</b>              |    |    |    |   |   |   |
| Subfam. Aphodiinae                    |    |    |    |   |   |   |
| <i>Aegialia kamtschatica</i> Motsch.  | ri | 1  | 1  | 0 | 0 | 0 |
| <i>Aphodius distinctus</i> Muell.?    | xe | 1  | 0  | 3 | 1 | 0 |
| <i>Aphodius</i> sp.                   | xe | 0  | 0  | 0 | 0 | 1 |
| <b>Fam. Byrrhidae</b>                 |    |    |    |   |   |   |
| Subfam. Byrrhinae                     |    |    |    |   |   |   |
| <i>Morychus viridis</i> Kuzm. et Kor. | ss | 12 | 29 | 4 | 4 | 3 |

|                                              |     |   |   |   |   |   |
|----------------------------------------------|-----|---|---|---|---|---|
| <i>Simplocaria arctica</i> Popp.             | dt  | 7 | 1 | 5 | 1 | 0 |
| <i>S. elongata</i> Sahlb.                    | dt  | 0 | 0 | 0 | 0 | 1 |
| Subfam. Syncalyptinae                        |     |   |   |   |   |   |
| <i>Curimopsis cyclolepidia</i> Muenst.       | dt  | 1 | 1 | 0 | 2 | 0 |
| <b>Fam. Ptinidae</b>                         |     |   |   |   |   |   |
| Subfam. Anobiinae                            |     |   |   |   |   |   |
| <i>Caenocara bovistae</i> Hoffm.             | pl  | 0 | 0 | 0 | 0 | 1 |
| Fam. Melyridae                               |     |   |   |   |   |   |
| <i>Protapalochrus arcticus</i> (L.Medv.)     | ms  | 2 | 0 | 0 | 0 | 1 |
| <b>Fam. Coccinellidae</b>                    |     |   |   |   |   |   |
| Subfam. Coccinellinae                        |     |   |   |   |   |   |
| <i>Hippodamia arctica</i> Schneid.           | ri  | 0 | 0 | 0 | 0 | 1 |
| <i>Scymnus</i> sp.                           | ri  | 0 | 1 | 0 | 0 | 0 |
| Coccinellidae gen. indet.                    | oth | 0 | 1 | 0 | 0 | 0 |
| <b>Fam. Lathridiidae</b>                     |     |   |   |   |   |   |
| Subfam. Corticariinae                        |     |   |   |   |   |   |
| <i>Corticaria</i> sp.                        | pl  | 1 | 2 | 1 | 0 | 0 |
| <b>Fam. Chrysomelidae</b>                    |     |   |   |   |   |   |
| Subfam. Chrysomelinae                        |     |   |   |   |   |   |
| <i>Chrysolina brunnicornis bermani</i> Medv. | st  | 0 | 3 | 0 | 0 | 0 |
| <i>Ch. subsulcata</i> Mann.                  | tt  | 0 | 6 | 2 | 0 | 0 |
| <i>Ch. septentrionalis</i> Men.              | mt  | 0 | 1 | 2 | 1 | 0 |
| <i>Ch. bungei</i> Jac.                       | tt  | 0 | 1 | 1 | 0 | 0 |
| <i>Chrysolina</i> sp.                        | oth | 0 | 0 | 0 | 0 | 1 |
| <i>Gonioctena affinis</i> Gyll.              | sh  | 0 | 0 | 0 | 0 | 1 |
| <i>Hydrothassa glabra</i> Hbst.              | ri  | 1 | 0 | 0 | 0 | 0 |
| <i>H. hannoverana</i> F.                     | ri  | 0 | 0 | 1 | 1 | 2 |
| <i>Phaedon concinnus</i> Steph.              | me  | 0 | 0 | 0 | 1 | 0 |
| <i>Phratora</i> sp.                          | sh  | 1 | 0 | 0 | 0 | 0 |
| Subfam. Eumolpinae                           |     |   |   |   |   |   |
| <i>Bromius obscurus</i> (L)                  | me  | 1 | 0 | 0 | 0 | 0 |
| <b>Fam. Brentidae</b>                        |     |   |   |   |   |   |
| Subfam. Apioninae                            |     |   |   |   |   |   |
| <i>Hemitrichapion tschernovi</i> T.-M.       | dt  | 0 | 0 | 1 | 1 | 0 |
| <b>Fam. Brachyceridae</b>                    |     |   |   |   |   |   |
| Subfam. Eirrhiniinae                         |     |   |   |   |   |   |

|                                                |    |   |   |   |   |   |
|------------------------------------------------|----|---|---|---|---|---|
| <i>Notaris bimaculatus</i> F.                  | ri | 1 | 1 | 0 | 0 | 0 |
| <b>Fam. Curculionidae</b>                      |    |   |   |   |   |   |
| Subfam. Ceutorhynchinae                        |    |   |   |   |   |   |
| <i>Pelenomus velaris</i> Gyll.                 | ri | 0 | 0 | 0 | 0 | 1 |
| <i>Pelenomus</i> sp.                           | ri | 1 | 0 | 0 | 0 | 0 |
| Subfam. Entiminae                              |    |   |   |   |   |   |
| <i>Phyllobius kolymensis</i> Kor. et Egor.     | ms | 0 | 0 | 0 | 0 | 1 |
| <i>Sitona borealis</i> Kor.                    | dt | 1 | 2 | 0 | 0 | 0 |
| Subfam. Hyperinae                              |    |   |   |   |   |   |
| <i>Hypera diversipunctata</i> (Schrank.)       | dt | 0 | 2 | 1 | 2 | 0 |
| <i>H. ornata</i> (Cap.)                        | dt | 3 | 1 | 1 | 0 | 1 |
| Subfam. Lixinae                                |    |   |   |   |   |   |
| <i>Coniocleonus</i> sp.                        | ms | 1 | 2 | 1 | 0 | 1 |
| <i>Stephanocleonus eruditus</i> Faust          | st | 0 | 4 | 0 | 0 | 0 |
| <i>S. fossulatus</i> F.-W.                     | st | 0 | 1 | 0 | 0 | 0 |
| Subfam. Molytinae                              |    |   |   |   |   |   |
| <i>Lepyrus nordenskiöldi</i> Faust             | sh | 1 | 2 | 0 | 2 | 0 |
| Subfam. Curculioninae                          |    |   |   |   |   |   |
| <i>Dorytomus imbecillus</i> Faust              | sh | 1 | 1 | 0 | 0 | 0 |
| <i>Isochnus flagellum</i> Erics.               | sh | 1 | 0 | 0 | 0 | 0 |
| <i>I. arcticus</i> Kor.                        | ar | 0 | 0 | 1 | 0 | 0 |
| <b>Ord. Hymenoptera</b>                        |    |   |   |   |   |   |
| <b>Fam. Formicidae</b>                         |    |   |   |   |   |   |
| <i>Leptothorax acervorum</i> (F.)              | fo | 0 | 0 | 0 | 0 | 1 |
| <b>Ord. Hemiptera, suboder Heteroptera</b>     |    |   |   |   |   |   |
| <b>Fam. Saldidae</b>                           |    |   |   |   |   |   |
| <i>Salda littoralis</i> L.                     | ri | 0 | 0 | 0 | 0 | 1 |
| <i>Salda</i> sp.                               | ri | 0 | 0 | 1 | 0 | 0 |
| <i>Saldula pallipes</i> (F.)                   | ri | 0 | 0 | 0 | 0 | 1 |
| <b>Fam. Pentatomidae</b>                       |    |   |   |   |   |   |
| <i>Sciocoris microphthalmus</i> Flor.          | fo | 0 | 0 | 0 | 0 | 1 |
| <b>Ord. Hemiptera, suboder Auchenorrhyncha</b> |    |   |   |   |   |   |
| <b>Fam. Cicadellidae</b>                       |    |   |   |   |   |   |
| Cicadellidae gen. indet.                       | me | 0 | 0 | 0 | 0 | 3 |
| <b>Ord. Trichoptera</b>                        |    |   |   |   |   |   |

|                                                |     |            |            |           |           |           |
|------------------------------------------------|-----|------------|------------|-----------|-----------|-----------|
| Trichoptera gen. indet. (larvae)               | aq  | 0          | 2          | 0         | 0         | 0         |
| <b>Ord. Diptera</b>                            |     |            |            |           |           |           |
| <b>Fam. Chironomidae</b>                       |     |            |            |           |           |           |
| Chironomidae gen. indet. (larvae)              | aq  | 1          | 2          | 0         | 0         | 0         |
| <b>Fam. Tipulidae</b>                          |     |            |            |           |           |           |
| Tipulidae gen. indet. (larvae head)            | pl  | 0          | 0          | 0         | 0         | 2         |
| Diptera gen. indet. (puparia)                  | oth | 1          | 0          | 0         | 0         | 4         |
| <b>Subfillum Crustacea, Class Branchiopoda</b> |     |            |            |           |           |           |
| <b>Ord. Notostraca</b>                         |     |            |            |           |           |           |
| <b>Fam. Triopsidae</b>                         |     |            |            |           |           |           |
| Triopsidae gen. indet. (mandibles)             | aq  | 0          | 0          | 0         | 0         | 5         |
|                                                |     | <b>217</b> | <b>202</b> | <b>89</b> | <b>72</b> | <b>69</b> |

**Table S6:** Mutual Climatic Range estimates for selected beetle species found in the Krest-Yuryakh Suite(MIS 5e) of the Dmitry Laptev Strait

| Species                            | MTWA <sub>Min</sub><br>[°C] | MTWA <sub>Max</sub><br>[°C] | MTCO <sub>Min</sub><br>[°C] | MTCO <sub>Max</sub><br>[°C] | Reference             |
|------------------------------------|-----------------------------|-----------------------------|-----------------------------|-----------------------------|-----------------------|
| <i>Diacheila polita</i>            | 2.5                         | 16                          | -41.75                      | 0                           | Elias (2000)          |
| <i>Blethisa catenaria</i>          | 7                           | 13.5                        | -38.5                       | -21                         | Elias (2000)          |
| <i>Pelophila borealis</i>          | 7.5                         | 16.5                        | -37                         | -3.5                        | Elias (2000)          |
| <i>Bembidion umiatense</i>         | 7.5                         | 10                          | -33                         | -28.5                       | Elias (2000)          |
| <i>Bembidion dauricum</i>          | 7.5                         | 13.5                        | -37.5                       | -17                         | Elias (2000)          |
| <i>Bembidion grapii</i>            | 8.5                         | 20.5                        | -37.5                       | -2.5                        | Elias (2000)          |
| <i>Elaphrus lapponicus</i>         | 10.5                        | 16.25                       | -35                         | -1.75                       | Elias (2000)          |
| <i>Dicheirotichus mannerheimii</i> | 6                           | 15.5                        | -39.5                       | -17.5                       | Elias (2000)          |
| <i>Poecilus nearcticus</i>         | 7                           | 11                          | -36                         | -27                         | Elias (2000)          |
| <i>Pterostichus brevicornis</i>    | 4.5                         | 15                          | -41.5                       | -15                         | Elias (2000)          |
| <i>Pterostichus pinguedineus</i>   | 7                           | 15.5                        | -38                         | -15.5                       | Elias (2000)          |
| <i>Pterostichus ventricosus</i>    | 6                           | 15.5                        | -39                         | -1.5                        | Elias (2000)          |
| <i>Pterostichus agonus</i>         | 5                           | 13                          | -39                         | -15                         | Elias (2000)          |
| <i>Pterostichus costatus</i>       | 5.25                        | 10.25                       | -36.75                      | -20.25                      | Elias (2000)          |
| <i>Pterostichus costatus</i>       | 1.5                         | 13                          | -37                         | -21.5                       | Alfimov et al. (2003) |
| <i>Pterostichus vermiculosus</i>   | 7                           | 14                          | -38                         | -17                         | Elias (2000)          |
| <i>Pterostichus sublaevis</i>      | 6.5                         | 14                          | -39                         | -13.5                       | Elias (2000)          |
| <i>Pterostichus sublaevis</i>      | 3.5                         | 16                          | -40                         | -19                         | Alfimov et al. (2003) |
| <i>Stereocerus haematopus</i>      | 5                           | 18.5                        | -40.5                       | -6.5                        | Elias (2000)          |
| <i>Stereocerus haematopus</i>      | 3.5                         | 17.5                        | -48                         | -17                         | Alfimov et al. (2003) |
| <i>Amara alpina</i>                | 5                           | 10.5                        | -39.5                       | -5.5                        | Elias (2000)          |
| <i>Amara bokori</i>                | 7                           | 16                          | -38                         | -12.5                       | Elias (2000)          |
| <i>Agabus moestus</i>              | 5                           | 17.5                        | -41                         | -9.5                        | Elias (2000)          |
| <i>Colymbetes dolobratus</i>       | 4.5                         | 15                          | -41                         | -9.5                        | Elias (2000)          |
| <i>Helophorus splendidus</i>       | 8.25                        | 10.25                       | -34.25                      | -27.25                      | Elias (2000)          |
| <i>Helophorus splendidus</i>       | 8.5                         | 15                          | -40                         | -12                         | Alfimov et al. (2003) |
| <i>Tachinus brevipennis</i>        | 3.5                         | 10.5                        | -36.5                       | -17.5                       | Elias (2000)          |
| <i>Tachinus arcticus</i>           | 3.5                         | 14                          | -38                         | -17                         | Alfimov et al. (2003) |
| <i>Aphodius distinctus</i>         | 9.5                         | 27                          | -33                         | +8.5                        | Elias (2000)          |
| <i>Morychus viridis</i>            | 4                           | 14.5                        | -50                         | -26                         | Alfimov et al. (2003) |
| <i>Chrysolina subsulcata</i>       | 2                           | 10                          | -34                         | -18.5                       | Alfimov et al. (2003) |

|                                   |     |    |       |     |                       |
|-----------------------------------|-----|----|-------|-----|-----------------------|
| <i>Chrysolina septentrionalis</i> | 2.5 | 21 | -35   | -5  | Alfimov et al. (2003) |
| <i>Stephanocleonus eruditus</i>   | 12  | 19 | -46.5 | -14 | Alfimov et al. (2003) |
| <i>Stephanocleonus fossulatus</i> | 12  | 21 | -46.5 | -14 | Alfimov et al. (2003) |

#### References

Alfimov, A.V., Berman, D.I., Sher, A.V.: Tundra-steppe insect assemblages and reconstruction of Late Pleistocene climate in the lower reaches of the Kolyma River, *Zoologicheskii Zhurnal*, 82(2), 281–300 (in Russian), 2003.

Elias, S.A. Climatic tolerances and zoogeography of the late Pleistocene beetle fauna of Beringia. *Géographie physique et Quaternaire*, 54, 143-155, 2000.

**Table S7:** Number of taxa, number of individuals, and ecology of fossil cladoceran assemblages obtained from profile samples at the shores of the Dmitry Laptev Strait.

| Taxa                              | <i>Acroperus harpae</i> | <i>Alona guttata</i> /C.<br><i>rectangula</i> | <i>Biapertura affinis</i> /A.<br><i>quadrangularis</i> | <i>A. guttata</i><br><i>tuberculata</i> / C.<br><i>rectangula pulchra</i> | <i>Alona intermedia</i> | <i>Alonella excisa</i> | <i>Bosmina</i> sp. | <i>Chydorus</i> cf.<br><i>sphaericus</i> | <i>Ceriodaphnia</i> sp. | <i>Daphnia pulex</i> gr. | <i>Eurycerus</i> sp. | <i>Leydigia leidigi</i> | <i>Sida crystallina</i> | Summe of Cladocera<br>individuals | N of taxa | Abundance of<br>individuals of<br>Cladocera per gram |
|-----------------------------------|-------------------------|-----------------------------------------------|--------------------------------------------------------|---------------------------------------------------------------------------|-------------------------|------------------------|--------------------|------------------------------------------|-------------------------|--------------------------|----------------------|-------------------------|-------------------------|-----------------------------------|-----------|------------------------------------------------------|
| <b>Bol'shoy Lyakhovsky Island</b> |                         |                                               |                                                        |                                                                           |                         |                        |                    |                                          |                         |                          |                      |                         |                         |                                   |           |                                                      |
| L7-11-07                          | 0                       | 0                                             | 0                                                      | 0                                                                         | 0                       | 0                      | 0                  | 4                                        | 0                       | 0                        | 0                    | 0                       | 0                       | 4                                 | 1         | 1                                                    |
| L7-11-12                          | 0                       | 0                                             | 0                                                      | 0                                                                         | 0                       | 0                      | 3                  | 3                                        | 0                       | 1                        | 0                    | 0                       | 0                       | 7                                 | 3         | 2                                                    |
| <b>Oyogos Yar</b>                 |                         |                                               |                                                        |                                                                           |                         |                        |                    |                                          |                         |                          |                      |                         |                         |                                   |           |                                                      |
| Oya-5-1                           | 1                       | 45                                            | 1                                                      | 1                                                                         | 1                       | 1                      | 44                 | 57                                       | 0                       | 2                        | 0                    | 0                       | 0                       | 153                               | 9         | n/a                                                  |
| Oya-3-11                          | 0                       | 1                                             | 0                                                      | 2                                                                         | 0                       | 0                      | 1                  | 22                                       | 2                       | 0                        | 0                    | 1                       | 0                       | 29                                | 6         | 11                                                   |
| Oy7-01-06                         | 0                       | 0                                             | 0                                                      | 0                                                                         | 0                       | 0                      | 0                  | 1                                        | 0                       | 1                        | 0                    | 0                       | 0                       | 2                                 | 2         | 4                                                    |
| Oy7-01-08                         | 0                       | 0                                             | 0                                                      | 0                                                                         | 0                       | 0                      | 0                  | 0                                        | 0                       | 1                        | 0                    | 0                       | 0                       | 1                                 | 1         | 2                                                    |
| Oy7-01-10                         | 0                       | 0                                             | 0                                                      | 0                                                                         | 0                       | 0                      | 0                  | 2                                        | 0                       | 0                        | 0                    | 0                       | 0                       | 2                                 | 1         | 4                                                    |
| Oy7-08-07                         | 1                       | 0                                             | 0                                                      | 0                                                                         | 0                       | 0                      | 1                  | 6                                        | 0                       | 17                       | 0                    | 0                       | 0                       | 25                                | 4         | 10                                                   |
| Oy7-08-11                         | 0                       | 0                                             | 0                                                      | 0                                                                         | 0                       | 0                      | 1                  | 1                                        | 0                       | 0                        | 0                    | 0                       | 0                       | 2                                 | 2         | 4                                                    |
| Oy7-08-19                         | 1                       | 2                                             | 2                                                      | 0                                                                         | 0                       | 1                      | 1                  | 23                                       | 0                       | 0                        | 3                    | 0                       | 1                       | 34                                | 9         | 13                                                   |
| Oy7-08-24                         | 0                       | 0                                             | 0                                                      | 0                                                                         | 0                       | 0                      | 0                  | 2                                        | 0                       | 0                        | 0                    | 0                       | 0                       | 2                                 | 1         | 4                                                    |



**Ecology**

|                       |       |     |   |     |     |       |     |      |   |   |       |     |       |
|-----------------------|-------|-----|---|-----|-----|-------|-----|------|---|---|-------|-----|-------|
| Temperature tolerance | C     | E   | - | E   | C   | -     | -   | E    | - | - | -     | T   | T     |
| Habitat               | L, Ph | L   | L | L   | L,B | L, Ph | P   | L, B | P | P | L, Ph | L,B | L, Ph |
| Saprobic Index        | o-b   | o-b | b | o-b | o   | o-b   | o-b | o-b  | - | - | o-b   | b-a | o     |

Explanations: C – cold-water, E – eurythermic, T – thermophilic; L – littoral, B – benthic, Pl – planktonic, Ph – photophilic; o – oligo saprobic, o-b – oligo-β-mesosaprobic, b-a – β-α-mesosaprobic. Referred to for information about ecology are [Flößner \(2000\)](#) and [Bledzki, Rybak \(2016\)](#).

**References**

- Bledzki, L.A., Rybak, J.I.: Freshwater crustacean zooplankton of Europe. Springer International Publishing Switzerland, 2016.
- Flößner, D.: Die Haplopoda und Cladocera (ohne Bosminidae) Mitteleuropas. Leiden: Backhuys Publishers, 2000.

**Table S8:** Species list of Last Interglacial freshwater ostracods obtained from profiles sampled at the shores of the Dmitry Laptev Strait.

| Location                               | Bol'shoy Lyakhovsky |                         | Oyogos Yar       |                         |                       |
|----------------------------------------|---------------------|-------------------------|------------------|-------------------------|-----------------------|
|                                        | L7-11               | L7-14                   | Oy7-01           | Oy7-08                  | Oya 5-1               |
| Reference                              | Schneider (2010)    | Wetterich et al. (2009) | Schneider (2010) | Wetterich et al. (2009) | Kienast et al. (2011) |
| juvenile Candoninae                    | x                   | x                       | x                | x                       | x                     |
| <i>Candona candida</i>                 | x                   | x                       | x                | x                       | x                     |
| <i>Candona muelleri-jakutica</i>       |                     |                         | x                | x                       | x                     |
| <i>Candona cf. neglecta</i>            |                     | x                       |                  | x                       |                       |
| <i>Fabaeformiscandona harmsworthi</i>  | x                   | x                       | x                | x                       | x                     |
| <i>Fabaeformiscandona levanderi</i>    |                     | x                       | x                | x                       | x                     |
| <i>Fabaeformiscandona pedata</i>       |                     |                         |                  |                         |                       |
| <i>Fabaeformiscandona rawsoni</i>      |                     | x                       | x                | x                       | x                     |
| <i>Fabaeformiscandona tricatricosa</i> | x                   | x                       |                  | x                       | x                     |
| <i>Eucypris dulcifons</i>              | x                   | x                       | x                |                         | x                     |
| <i>Ilyocypris lacustris</i>            |                     | x                       |                  | x                       | x                     |
| <i>Ilyocypris sp.</i>                  | x                   |                         | x                |                         |                       |
| <i>Cytherissa lacustris</i>            | x                   | x                       |                  | x                       | x                     |
| <i>Limnocytherina sanctipatricii</i>   | x                   | x                       | x                | x                       |                       |
| <i>Limnocythere sp.</i>                | x                   |                         |                  |                         |                       |
| <i>Limnocythere falcata</i>            |                     | x                       | x                | x                       |                       |
| <i>Limnocythere suessenbornesis</i>    |                     | x                       |                  | x                       |                       |
| <i>Tonnacypris cf. glacialis</i>       |                     |                         | x                |                         |                       |
| <i>Cypria exsculpta</i>                |                     |                         |                  | x                       | x                     |
| <i>Cypria laevis</i>                   |                     | x                       |                  | x                       |                       |
| <i>Cypria opthalmica</i>               |                     |                         |                  |                         | x                     |
| <i>Cyclocypris ovum</i>                |                     |                         |                  |                         | x                     |
| <i>Bradleystrandesia reticulata</i>    |                     |                         |                  |                         | x                     |

References

Kienast, F., Wetterich, S., Kuzmina, S., Schirrmeyer, L., Andreev, A., Tarasov, P., Nazarova, L., Kossler, A., Frolova, A., Kunitsky, V.V.: Paleontological records indicate the occurrence of open woodlands in a dry inland climate at the present-day Arctic coast in western Beringia during the Last Interglacial, *Quaternary Science Reviews*, 30, 2134–2159, doi:10.1016/j.quascirev.2010.11.024, 2011.

Schneider, A.: Characteristics of an Eemian thermokarst landscape based on fossil bioindicators from permafrost deposits at the Dimitri Laptev Strait, northeastern Siberia, Bachelor thesis, Geographical Institute of the Humboldt University of Berlin (in German), 2010.

Wetterich, S., Schirrmeyer, L., Andreev, A.A., Pudenz, M., Plessen, B., Meyer, H., Kunitsky, V.V.: Eemian and Late Glacial/Holocene palaeoenvironmental records from permafrost sequences at the Dmitry Laptev Strait (NE Siberia, Russia), *Palaeogeography, Palaeoclimatology, Palaeoecology* 279, 73-95 doi:10.1016/j.palaeo.2009.05.002, 2009.

**Table S9:** Clumped and stable isotope measurements for biogenic carbonates. Highlighted samples are outliers ( $> \bar{x} \pm 2\sigma$ ), and those with elevated  $\Delta 48$  values, indicative of contamination, which have been excluded from final analyses.

| Sample ID                   | Sample Name        | $\delta^{13}\text{C} \text{‰ VPDB}$ | $\delta^{18}\text{O} \text{‰ VPDB}$ | $\Delta 47 \text{‰ iCDES}$ | $\Delta 48 \text{‰ (local reference frame)}$ |
|-----------------------------|--------------------|-------------------------------------|-------------------------------------|----------------------------|----------------------------------------------|
| <b>Oy 5 - 1 C candida</b>   |                    |                                     |                                     |                            |                                              |
| 2023-06-27 23:50            | Oy 5 - 1 Candida   | -6.3                                | -14.03                              | 0.651                      | 0.168                                        |
| 2023-06-28 20:04            | Oy 5 - 1 Candida   | -6.48                               | -14.08                              | 0.762                      | 0.497                                        |
| 2023-06-29 14:07            | Oy 5 - 1 Candida   | -6.32                               | -14.1                               | 0.648                      | 0.2                                          |
| 2023-06-30 09:20            | Oy 5 - 1 Candida   | -6.38                               | -14.05                              | 0.65                       | 0.222                                        |
| 2023-06-30 21:23            | Oy 5 - 1 Candida   | -6.37                               | -14.02                              | 0.614                      | 0.006                                        |
| 2023-07-01 11:41            | Oy 5 - 1 Candida   | -6.38                               | -14.2                               | 0.678                      | 0.132                                        |
| 2023-07-01 18:58            | Oy 5 - 1 Candida   | -6.27                               | -14.17                              | 0.688                      | 0.033                                        |
| 2023-07-02 03:53            | Oy 5 - 1 Candida   | -6.36                               | -14.21                              | 0.647                      | 0.13                                         |
| 2023-07-02 20:05            | Oy 5 - 1 Candida   | -6.31                               | -14.12                              | 0.729                      | 0.192                                        |
| 2023-07-03 13:25            | Oy 5 - 1 Candida   | -6.47                               | -14.24                              | 0.709                      | 0.154                                        |
| 2023-07-04 00:12            | Oy 5 - 1 Candida   | -6.36                               | -14.16                              | 0.681                      | 0.08                                         |
| 2023-07-04 09:10            | Oy 5 - 1 Candida   | -6.42                               | -14.15                              | 0.628                      | -0.022                                       |
| 2023-07-04 17:33            | Oy 5 - 1 Candida   | -6.52                               | -14.19                              | 0.587                      | -0.041                                       |
| 2023-07-09 05:03            | Oy 5 - 1 Candida   | -6.23                               | -14.12                              | 0.575                      | 0.052                                        |
| 2023-07-09 23:09            | Oy 5 - 1 candida   | -6.2                                | -14.05                              | 0.582                      | 0.006                                        |
| 2023-07-10 04:30            | Oy 5 - 1 Candida   | -6.19                               | -14.05                              | 0.62                       | 0.173                                        |
| 2023-07-18 02:19            | Oy 5 - 1 candida   | -6.37                               | -14.11                              | 0.645                      | 0.079                                        |
| 2023-07-18 14:56            | Oy 5 - 1 candida   | -6.34                               | -14.08                              | 0.635                      | 0.2                                          |
| 2023-07-18 20:47            | Oy 5 - 1 candida   | -6.39                               | -14.08                              | 0.572                      | -0.087                                       |
| <b>Oy 5 - 1 C lacustris</b> |                    |                                     |                                     |                            |                                              |
| 2023-07-01 17:18            | Oy 5 - 1 Lacustris | -9.45                               | -14.25                              | 0.679                      | 0.058                                        |
| 2023-07-02 07:46            | Oy 5 - 1 Lacustris | -9.42                               | -14.24                              | 0.708                      | 0.173                                        |
| 2023-07-03 00:09            | Oy 5 - 1 Lacustris | -9.43                               | -14.23                              | 0.7                        | 0.1                                          |
| 2023-07-03 16:54            | Oy 5 - 1 Lacustris | -9.44                               | -14.18                              | 0.683                      | -0.114                                       |
| 2023-07-03 22:33            | Oy 5 - 1 Lacustris | -9.25                               | -14.16                              | 0.712                      | 0.129                                        |
| 2023-07-04 10:51            | Oy 5 - 1 Lacustris | -9.26                               | -14.14                              | 0.644                      | -0.086                                       |
| 2023-07-04 15:54            | Oy 5 - 1 Lacustris | -9.47                               | -14.26                              | 0.621                      | 0.081                                        |
| 2023-07-09 03:26            | Oy 5 - 1 Lacustris | -9.17                               | -14.33                              | 0.603                      | 0.081                                        |
| 2023-07-09 07:01            | Oy 5 - 1 Lacustris | -9.25                               | -14.35                              | 0.585                      | 0.111                                        |
| 2023-07-09 10:22            | Oy 5 - 1 Lacustris | -9.32                               | -14.39                              | 0.594                      | 0.057                                        |
| 2023-07-09 21:13            | Oy 5 - 1 Lacustris | -9.3                                | -14.32                              | 0.586                      | -0.018                                       |
| 2023-07-10 00:53            | Oy 5 - 1 Lacustris | -9.17                               | -14.34                              | 0.576                      | 0.109                                        |
| 2023-07-10 02:31            | Oy 5 - 1 Lacustris | -9.23                               | -14.39                              | 0.619                      | 0.043                                        |
| 2023-07-10 06:28            | Oy 5 - 1 Lacustris | -9.41                               | -14.4                               | 0.613                      | 0.16                                         |
| 2023-07-11 12:53            | Oy 5 - 1 Lacustris | -9.22                               | -14.31                              | 0.602                      | 0.244                                        |
| 2023-07-18 04:18            | Oy 5 - 1 Lacustris | -9.31                               | -14.2                               | 0.641                      | 0.073                                        |
| 2023-07-18 12:58            | Oy 5 - 1 Lacustris | -9.2                                | -14.32                              | 0.637                      | 0.027                                        |

|                              |                       |       |        |       |        |
|------------------------------|-----------------------|-------|--------|-------|--------|
| 2023-07-18 16:53             | Oy 5 - 1 Lacustris    | -9.1  | -14.25 | 0.723 | 0.204  |
| 2023-07-18 22:45             | Oy 5 - 1 Lacustris    | -9.13 | -14.31 | 0.636 | 0.08   |
| 2023-10-16 07:52             | Oy 5 - 1 Lacustris    | -4.76 | -13.28 | 0.519 | -0.209 |
| 2023-10-16 17:06             | Oy 5 - 1 Lacustris    | -8.47 | -14.57 | 0.679 | -0.112 |
| 2023-10-18 22:43             | Oy 5 - 1 Lacustris    | -8.45 | -14.55 | 0.615 | -0.155 |
| <b>Oy 5 - 1 P casertanam</b> |                       |       |        |       |        |
| 2023-05-06 12:38             | Oy 5 - 1 P casertanam | -8.09 | -14.69 | 0.687 | -0.02  |
| 2023-05-07 16:05             | Oy 5 - 1 P casertanam | -8.64 | -15.11 | 0.651 | -0.034 |
| 2023-05-08 21:23             | Oy 5 - 1 P casertanam | -8.57 | -14.56 | 0.642 | -0.198 |
| 2023-05-25 09:53             | Oy 5 - 1 P casertanam | -8.21 | -14.66 | 0.67  | 0.065  |
| 2023-05-25 15:27             | Oy 5 - 1 P casertanam | -8.39 | -14.6  | 0.664 | -0.03  |
| 2023-05-31 12:20             | Oy 5 - 1 P casertanam | -8.24 | -14.86 | 0.661 | 0.023  |
| 2023-06-01 06:36             | Oy 5 - 1 P casertanam | -7.82 | -14.64 | 1.335 | 1.326  |
| 2023-06-02 15:16             | Oy 5 - 1 P casertanam | -8.34 | -14.65 | 0.653 | -0.055 |
| 2023-06-17 00:11             | Oy 5 - 1 P casertanam | -8.23 | -14.68 | 0.62  | -0.306 |
| 2023-06-17 16:20             | Oy 5 - 1 P casertanam | -8.25 | -14.62 | 0.64  | -0.174 |
| 2023-06-18 10:34             | Oy 5 - 1 P casertanam | -8.12 | -14.79 | 0.65  | -0.196 |
| 2023-06-18 23:39             | Oy 5 - 1 P casertanam | -8.33 | -14.68 | 0.667 | -0.169 |
| 2023-06-19 18:46             | Oy 5 - 1 P casertanam | -8.3  | -14.65 | 0.643 | -0.24  |
| 2023-06-20 21:16             | Oy 5 - 1 P casertanam | -8.39 | -14.67 | 0.674 | -0.255 |
| 2023-06-21 17:28             | Oy 5 - 1 P casertanam | -8.3  | -14.69 | 0.653 | -0.287 |
| 2023-06-22 08:47             | Oy 5 - 1 P casertanam | -8.33 | -14.63 | 0.707 | -0.23  |
| 2023-06-23 05:11             | Oy 5 - 1 P casertanam | -8.14 | -14.47 | 0.646 | -0.254 |

**Table S10:** Models contributing to PaleoMIP lig127k.

| Model           | Institution         | nominal resolution (km) | simulation years in lig127k |
|-----------------|---------------------|-------------------------|-----------------------------|
| AWI-ESM-1-1-LR  | AWI                 | 250                     | 100                         |
| FGOALS-f3-L     | CAS                 | 100                     | 500                         |
| FGOALS-g3       | CAS                 | 250                     | 500                         |
| CNRM-CM6-1      | CNRM                | 250                     | 300                         |
| ACCESS-ESM1-5   | CSIRO               | 250                     | 200                         |
| EC-Earth3-LR    | EC Earth Consortium | 100                     | 210                         |
| INM-CM4-8       | INM                 | 100                     | 100                         |
| IPSL-CM6A-LR    | IPSL                | 250                     | 550                         |
| MIROC-ES2L      | MIROC               | 500                     | 100                         |
| GISS-E2-1-G     | NASA                | 250                     | 100                         |
| CESM2           | NCAR                | 100                     | 700                         |
| NorESM1-F       | NCC                 | 250                     | 200                         |
| NorESM2-LM      | NCC                 | 250                     | 100                         |
| HadGEM3-GC31-LL | NERC                | 250                     | 200                         |
| NESM3           | NUIST               | 250                     | 100                         |

## Supplement material\_Figures

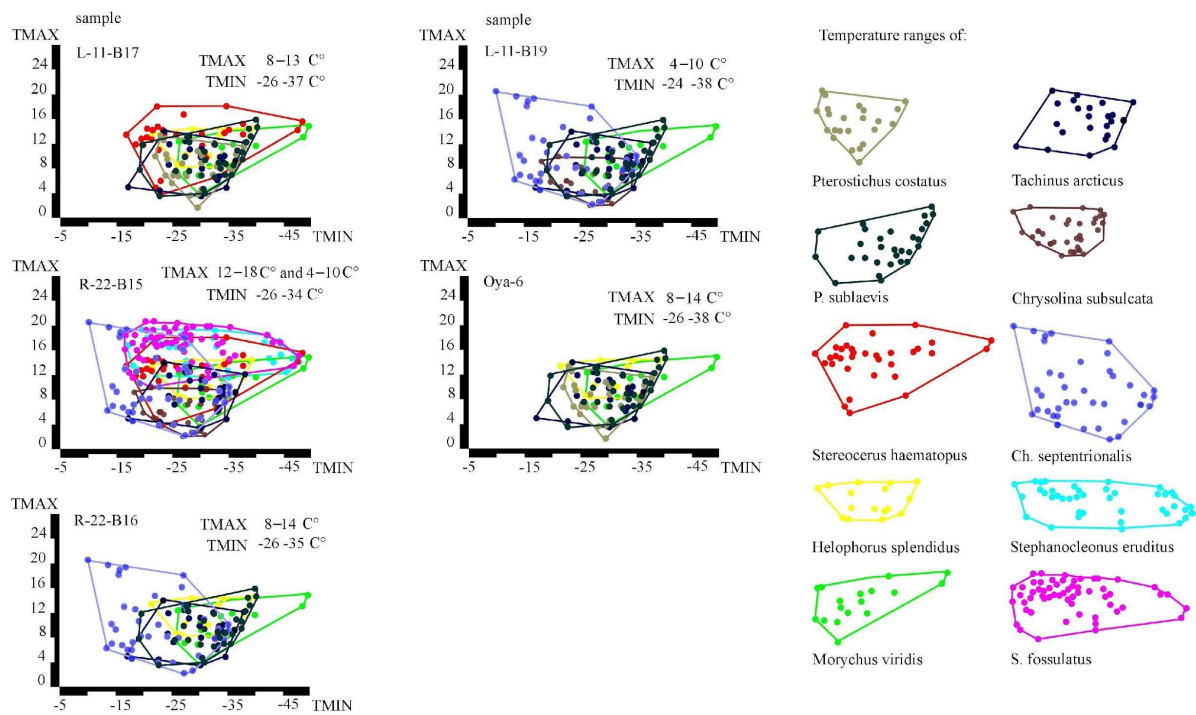

**Figure S1:** Climate ranges of selected species (from Alfimov et al., 2003) and MCR evaluation for the Last Interglacial samples from the Dmitry Laptsev Strait area

## References

Alfimov, A.V., Berman, D.I., and Sher, A.V.: Tundra-steppe insect assemblages and reconstruction of Late Pleistocene climate in the lower reaches of the Kolyma River, *Zoologicheskii Zhurnal*, 82(2), 281–300 (in Russian), 2003.

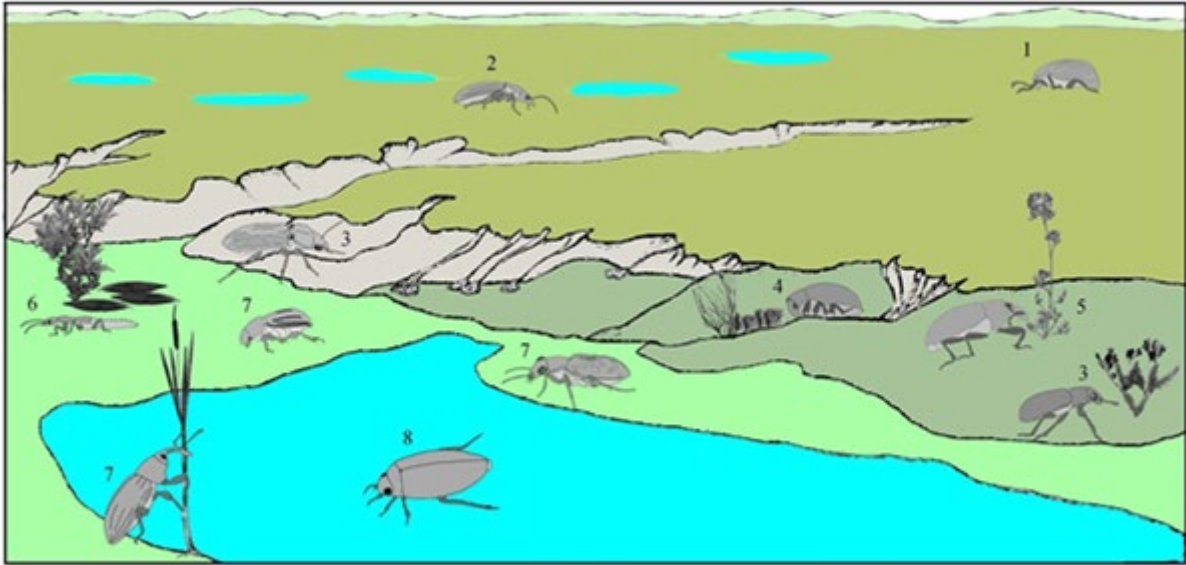

**Figure S2:** The beetle paleo-environments: Thermokarst landscape and habitats of different ecological groups of beetles. Groups: 1 arctic tundra, 2 wet and mesic tundra, 3 dry tundra, 4 cryoxerophilous steppe, 5 thermophilous steppe, 6 plant litter, 7 riparian, 8 aquatic. Thermokarst created different landscape forms, such as north and south-faced slopes, wetland depressions, and disturbed ground. Such variation supports more habitats than flat tundra.



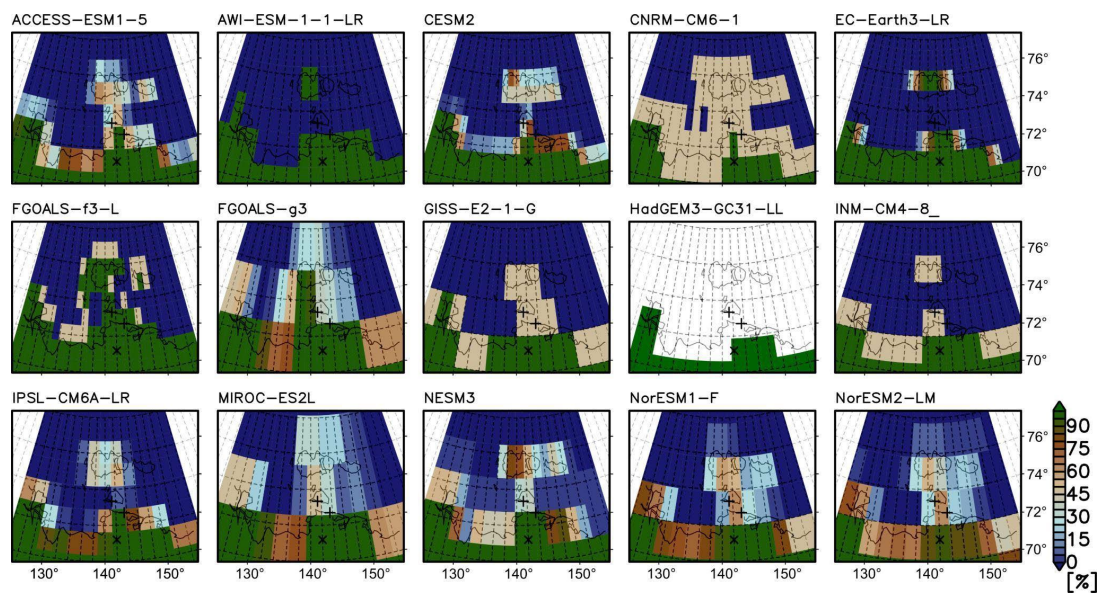

**Figure S3:** Land sea masks of the PaleomIP models. Not all models provide land fractions. For CNRM-CM6-1, FGOALS-f3\_L, GISS-E2-1-G, and INM-CM4-8, grid cells with fractional land coverage are generically marked with 50% land due to a lack of detailed information. For HadGEM3-GC31-LL, only grid cells being 100% land could be identified. Note that the generic land point marked with the x is situated in grid cells with 100% land for all models.

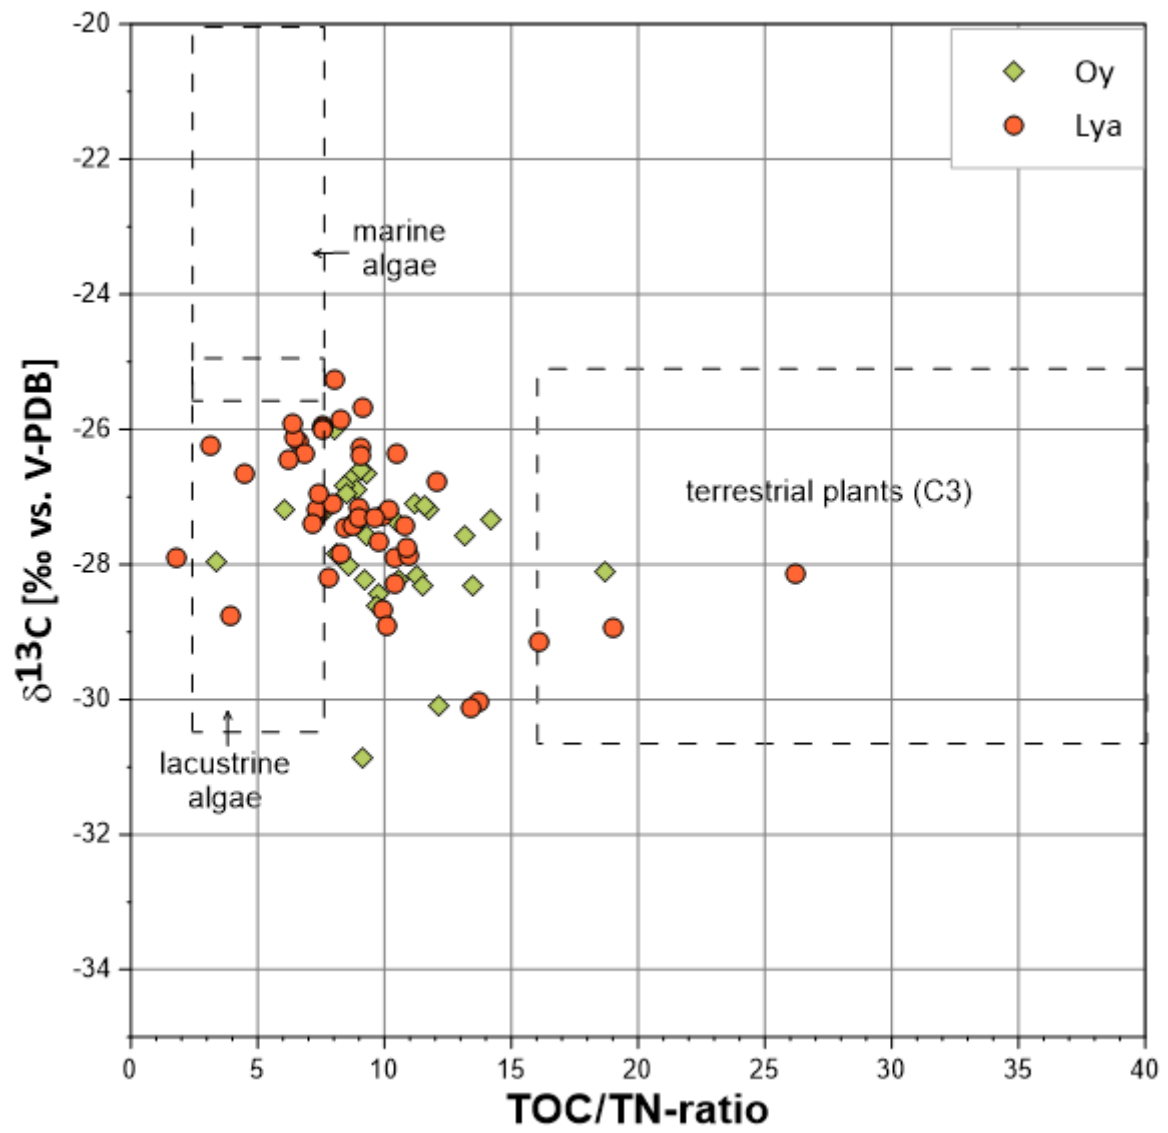

Figure S4: The ratio of TOC/TN to  $\delta^{13}\text{C}$  values of Krest-Yuryakh deposits.
