# Supplementary material for: Newly dated permafrost deposits and their paleo-ecological inventory reveal a much warmer-than-today Eemian in Arctic Siberia
Source: Copernicus journal article supplement (doi:10.5194/cp-2024-74), 2024-11-22
Supplement: Supplementary file [file cp-2024-74-RC2-supplement.pdf]

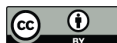

1 **Newly dated permafrost deposits and their paleo-ecological**  
2 **inventory reveal a much warmer-than-today Eemian in Arctic**  
3 **Siberia**

4 Lutz Schirrmeyer<sup>1</sup>, Margret C. Fuchs<sup>2</sup>, Thomas Opel<sup>3</sup>, Andrei Andreev<sup>3</sup>, Frank Kienast<sup>4</sup>,  
5 Andrea Schneider<sup>5</sup>, Larisa Nazarova<sup>6</sup>, Larisa Frolova<sup>7, 21</sup>, Svetlana Kuzmina<sup>8</sup>, Tatiana  
6 Kuznetsova<sup>9</sup>, Vladimir Tumskoy<sup>10</sup>, Heidrun Matthes<sup>11</sup>, Gerrit Lohmann<sup>12</sup>, Guido Grosse<sup>1, 13</sup>,  
7 Viktor Kunitsky<sup>10</sup>, Hanno Meyer<sup>3</sup>, Heike H. Zimmermann<sup>14</sup>, Ulrike Herzsich<sup>3, 15</sup>, Thomas  
8 Böhmer<sup>3</sup>, Stuart Umbo<sup>16</sup>, Sevi Modestou<sup>16</sup>, Sebastian F.M. Breitenbach<sup>16</sup>, Anfisa Pismeniuk<sup>17</sup>,  
9 Georg Schwamborn<sup>18</sup>, Stephanie Kusch<sup>19</sup>, Sebastian Wetterich<sup>1, 20</sup>

10

11 <sup>1</sup>Permafrost Research Section, Alfred Wegener Institute, Helmholtz Center for Polar and Marine Research,  
12 Potsdam, Germany

13 <sup>2</sup>Exploration, Helmholtz Institute for Resource Technology, Freiberg, Germany

14 <sup>3</sup>Polar Terrestrial Environmental Systems Section, Alfred Wegener Institute, Helmholtz Center for Polar and  
15 Marine Research, Potsdam, Germany

16 <sup>4</sup>Quaternary Paleontology, Senckenberg Research Institute and Natural History Museum, Weimar, Germany

17 <sup>5</sup>Arctic University of Norway, Tromsø, Norway

18 <sup>6</sup>Krasnoyarsk Science Center, SB RAS, Krasnoyarsk, Russia

19 <sup>7</sup>Kazan Federal University, Russia

20 <sup>8</sup>Boryssyak Paleontological Institute, RAS, Moscow, Russia

21 <sup>9</sup>Faculty of Geology, Lomonosov Moscow State University, Russia

22 <sup>10</sup>Mel'nikov Permafrost Institute, SB RAS, Yakutsk, Russia

23 <sup>11</sup>Atmospheric Physics Section, Alfred Wegener Institute, Helmholtz Center for Polar and Marine Research,  
24 Potsdam, Germany

25 <sup>12</sup>Paleoclimate Dynamics Section, Alfred Wegener Institute, Helmholtz Center for Polar and Marine Research,  
26 Bremerhaven, Germany

27 <sup>13</sup>Institute of Geosciences, University of Potsdam, Germany

28 <sup>14</sup>Glaciology and Climate Department, Geological Survey of Denmark and Greenland, Copenhagen, Denmark

29 <sup>15</sup>Institute of Environmental Science and Geography, Institute of Biochemistry and Biology, University of  
30 Potsdam, Germany

31 <sup>16</sup>Geography and Environmental Sciences, Northumbria University, Newcastle, UK

32 <sup>17</sup>Department of Geosciences, University of Oslo, Oslo, Norway

33 <sup>18</sup>Eberswalde University for Sustainable Development, Department of Landscape Management and Nature  
34 Conservation, Eberswalde, Germany

35 <sup>19</sup>Institute of Marine Sciences (ISMER), University of Quebec Rimouski, Rimouski, Canada

36 <sup>20</sup>Current address: Institute of Geography, Technische Universität Dresden, Germany

37 <sup>21</sup>Institute of Archaeology and Ethnography, SB RAS, Novosibirsk, Russia

38 *Correspondence to:* Lutz Schirrmeyer (lutz.schirrmeyer@awi.de)

39

40 **Keywords:** Marine Isotope Stage 5e, luminescence dating, cryolithology, paleo-proxy, model-based climate  
41 **reconstructions, MTWA, MTCO, MAP, clumped isotopes**



1

2 **Abstract.** Fossil proxy records in Last Interglacial (LIG, ca. 130-115 ka) lacustrine thermokarst deposits now  
3 preserved in permafrost can provide insights into terrestrial Arctic environments during a period when northern  
4 hemisphere climate conditions were warmer than today and which might be considered a potential analog for a  
5 near-future warmer Arctic. Still, such records are scarce on a circum-Arctic scale and often poorly dated. Even  
6 more, the quantitative climate signals of LIG permafrost-preserved deposits have not yet been systematically  
7 explored.

8 Here, we synthesize geochronological, cryolithological, paleo-ecological, and modeling data from one of the most  
9 thoroughly studied LIG sites in NE Siberia, the permafrost sequences along the coasts of the Dmitry Laptev Strait,  
10 i.e., on Bol'shoy Lyakhovsky Island and at the Oyogos Yar coast. We provide chronostratigraphic evidence by  
11 new luminescence ages from lacustrine deposits exposed at the southern coast of Bol'shoy Lyakhovsky Island.  
12 The infrared-stimulated luminescence (IRSL) ages of  $127.3 \pm 6.1$  ka,  $117.8 \pm 6.8$  ka, and  $117.6 \pm 6.0$  ka capture the  
13 MIS 5e sub-stage, i.e., the LIG.

14 The LIG lacustrine deposits are mostly preserved in ice-wedge pseudomorphs of 1-3 m thickness with alternating  
15 layers of peaty plant detritus and clayish silt. Ripples and syndimentary slumping structures indicate shallow-  
16 water conditions. The rich fossil record was examined for plant remains (macro-fossils, pollen, *sedaDNA*), lipid  
17 biomarkers, and aquatic and terrestrial invertebrates (cladocera, mussels, snails, ostracods, chironomids, and  
18 beetles).

19 Most proxy data and also paleoclimate model results indicate a regional LIG climate significantly (ca. 5 to 10 °C)  
20 warmer than today. Plant macrofossil data reflect mean temperatures of the warmest month (MTWA) of 12.7–15.3  
21 °C for Oyogos Yar and 10.3–12.9 °C for Bol'shoy Lyakhovsky, while pollen-based reconstructions show mean  
22 MTWA of  $9.0 \pm 3.0$  °C and  $9.7 \pm 2.9$  °C as well as mean annual precipitation (MAP) of  $271 \pm 56$  mm and  $229 \pm 22$   
23 mm, respectively. The biomarker-based reconstruction of the Air Growing Season Temperature (Air GST) using  
24 GDGTs is  $2.8 \pm 0.3$  °C. The fossil beetle-based mutual climatic range is 8 to 10.5 °C for MTWA and –34 to –26 °C  
25 for the mean temperature of the coldest month (MTCO) on Bol'shoy Lyakhovsky Island and 8 to 14 °C for MWTA  
26 and –38 to –26 °C for MTCO on Oyogos Yar. The chironomid-based MTWA varies between  $9.4 \pm 1.7$  and  $15.3 \pm 1.5$   
27 °C and the water depth (WD) between  $1.7 \pm 0.9$  and  $5.6 \pm 1.0$  m on Bol'shoy Lyakhovsky Island. Prior findings from  
28 Oyogos Yar in the literature suggest an MTWA of  $12.9 \pm 0.9$  °C and a WD of  $2.2 \pm 1.1$  m. The first-time application  
29 of clumped isotopes to permafrost-preserved biogenic calcite of ostracods and bivalves reconstruct near-surface  
30 water temperature of  $10.3 \pm 3.0$  °C and bottom water temperatures of  $1.5 \pm 5.3$  °C in thermokarst lakes during  
31 summers. PaleoMIP Model simulations (PIobs+(lig127k-PI)) of the LIG show warmer MTWA compared to  
32 modern conditions (by  $4.4 \pm 1.0$  °C for Bol'shoy Lyakhovsky and  $4.5 \pm 1.2$  °C for Oyogos Yar) but currently  
33 underestimate the Eemian warming reconstructed from our multiple paleoecological proxies.

34 The LIG warming mainly affected summer conditions, whereas modern and future warming will rather impact  
35 winter conditions. As the LIG annual mean temperature is often used as an analog for the future climate in the  
36 High Arctic, the proxy-model mismatch highlights the urgent need for more systematic quantitative proxy-based  
37 temperature reconstructions in the Arctic and more sophisticated Earth system models capable of capturing Arctic  
38 paleoenvironmental conditions.



## 1 1 Introduction

2 The climate control on permafrost dynamics during the late Quaternary is reflected in large-scale permafrost  
3 aggradation during glacial periods and extensive thaw in interglacial periods (Shur and Jorgenson, 2007; Jones et  
4 al., 2023; Opel et al., 2024). These broader climate-driven dynamics were superimposed by local factors, including  
5 topography, hydrology, and vegetation cover, as well as natural disturbances causing localized rapid thaw such as  
6 thermokarst lakes or wildfires. During warm periods, rising air temperatures and, consequently, rising ground  
7 temperatures and active-layer thickening promote ground-ice melting, surface subsidence, and the formation of  
8 thermokarst lakes and basins in areas underlain by ice-rich permafrost (Czudek and Demek, 1970; Grosse et al.,  
9 2013; Brosius et al., 2021). Shallow thermokarst lakes might develop that can preserve traces of landscape  
10 evolution, paleoclimate, and paleoecology in lacustrine sediments (Murton, 1996; Lenz et al., 2016; Bouchard et  
11 al., 2017). Thawing ice-wedge polygons below the lake-water level form ice-wedge casts (pseudomorphs), which  
12 may also preserve laminated lacustrine deposits (Farquharson et al., 2016). Lake drainage or desiccation over time  
13 promotes the formation of typically palustrine (peaty) deposits above the lacustrine sequences in thermokarst  
14 basins (e.g., Morgenstern et al., 2013). However, permafrost aggradation and degradation are not restricted to  
15 glacial and interglacial periods, respectively. At least on the local to regional scale, permafrost formation is also  
16 reported for interglacial times such as associated with pingo formation (Wetterich et al., 2018) or peat growth  
17 during the Holocene (Kaplina, 2011a, 2011b; Wetterich et al., 2009) and permafrost degradation occurred during  
18 interstadial stages of glacial periods (Vaks et al., 2020, 2013).

19 The globally warmer-than-today Last Interglacial (LIG, ca. 130-115 ka) is commonly seen as a potential analog  
20 for future climate warming. Due to summer insolation higher than today and additional feedback effects such as  
21 the retreat of ice sheets, reduction of summer sea ice, and expansion of boreal forests, the LIG warming in the  
22 Arctic was amplified compared to the Northern Hemisphere as a whole (CAPE-LIG Project Members, 2006).  
23 Recent studies combining proxy evidence across the Arctic (mainly from terrestrial and lacustrine pollen and plant  
24 macrofossils and Greenland ice cores) and paleoclimate modeling largely agree on 4-5 °C higher summer  
25 temperatures than today and a nearly sea-ice free Arctic Ocean during summers (Guarino et al., 2020; Sime et al.,  
26 2023; Vermassen et al., 2023), accompanied by a High Arctic greening (Crump et al., 2021). For a reduced  
27 Greenland Ice Sheet, up to +5 °C regional warming is modeled for the LIG (Pfeiffer and Lohmann, 2016).  
28 However, ~~it is important to note that~~ the warmer than today conditions during the LIG were predominantly driven  
29 by increased summer solar insolation, unlike modern Arctic warming, which is most pronounced in winter due to  
30 anthropogenic forcing. Despite this difference, many of the consequences of summer warming in the LIG – such  
31 as ice sheet retreat, reduction of sea ice, and permafrost degradation – are observable in the changing Arctic today,  
32 supporting the continued relevance of the LIG as an analog setting. There are only limited quantitative paleoclimate  
33 data on the terrestrial interglacial MIS 5e conditions in the Arctic (e.g., CAPE-LIG Project Members, 2006; Sime  
34 et al., 2023), with sparse sites that are widely spaced and which often have only single or few selected paleoproxies  
35 and rather poor temporal constraints. Part of the mismatch between model and proxy data can be reconciled by  
36 considering the potential seasonal bias of the proxy record and/or the uncertainties in the dating of the proxy  
37 records for the LIG thermal maximum (Pfeiffer and Lohmann, 2016). Many terrestrial records of the LIG in the  
38 Arctic are found in fluvial deposits exposed in river bluffs or artificial placer mining cuts in Alaska (Hamilton &  
39 Brigham-Grette, 1991; Edwards et al., 2003; Jensen et al., 2013), Siberia (Velichko et al., 2008), or NW Canada  
40 (Reyes et al., 2010). As interglacial climate conditions degraded pre-existing ice-rich permafrost deposits and also  
41 promoted the formation of thermokarst basins and lakes, the interglacial legacy in permafrost regions is also

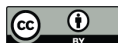

1 commonly represented by thaw unconformities and lacustrine and palustrine deposits. Some of these sites  
2 attributed to the LIG are known from eastern Siberia in the Yana-Indigirka Lowland (site Achagy-Allaikha,  
3 Kaplina, 1980, 1981) and the Kolyma Lowland (site Duvanny Yar; Kaplina, 2011a). Furthermore, the world's  
4 currently largest permafrost degradation feature, the Batagay megaslump in the Yana Upland in eastern Siberia,  
5 exposes a distinct woody debris layer below an erosional disconformity of Marine Isotope Stage (MIS) 5e age,  
6 i.e., the LIG that is overlain by MIS 4 to MIS 2 Yedoma Ice Complex deposits (Ashastina et al., 2017; Murton et  
7 al., 2022).

8 Extensive late Pleistocene paleoecological studies on ice-wedge pseudomorphs and other lacustrine sequences  
9 were conducted on coastal exposures at both coasts of the Dmitry Laptev Strait that connects the Laptev and the  
10 East Siberian seas (Figure 1). Both the southern coast of Bol'shoy Lyakhovsky Island near the Zimov'e River  
11 mouth and the Oyogos Yar mainland coast near the Kondrat'eva River mouth have been studied for LIG pollen,  
12 plant macrofossils, fossil insect remains including beetles and chironomids, lacustrine invertebrates such as  
13 ostracods, cladocera, and mollusks, and testate amoebae and sedimentary ancient DNA (Andreev et al., 2004,  
14 2011; Ilyashuk et al., 2006; Kienast et al., 2008, 2011; Wetterich et al., 2009; Schneider, 2010; Zimmermann et  
15 al., 2017). However, only scarce chronological control is available (Andreev et al., 2004; Opel et al., 2017) for  
16 lacustrine deposits, which are locally named the Krest-Yuryakh stratum (Tumskoy and Kuznetsova, 2022) and  
17 commonly interpreted as deposits of the LIG, i.e., MIS 5e (Eemian). Mammal bones belonging to the late  
18 Pleistocene Mammoth fauna in Krest-Yuryakh deposits are very rare and poorly dated (Kuznetsova et al., 2022).  
19 Ancient thermokarst deposits and their paleoenvironmental inventory can provide interesting analogs for modern  
20 and (near-)future warming and its impact on periglacial landscapes and ecosystems. ~~During the Lateglacial to  
21 Holocene transition, thermokarst processes re-shaped vast areas of the Beringian periglacial landscapes by thawing  
22 the MIS 4 to MIS 2 Yedoma Ice Complex deposits (Jones et al., 2022; Walther Anthony et al., 2014; Morgenstern  
23 et al., 2013), and paleoecological records from past warming episodes such as the Lateglacial Interstadials (e.g.,  
24 Allerød) and the early Holocene with rapid permafrost degradation are fairly well characterized, helping to  
25 understand interactions between climate, permafrost, and ecosystem dynamics. For example, previous  
26 paleobotanical studies associated with thermokarst deposits from NE Siberia revealed quantitative estimates of the  
27 Lateglacial-early Holocene warming with a pollen-based mean temperature of the warmest month (MTWA) of 8-  
28 12 °C (Andreev et al., 2009, 2011). Likewise, the LIG climate warming led to the degradation of previously  
29 aggraded ice-rich permafrost deposits by thermokarst processes. A LIG (MIS 5e) macrofossil-based reconstruction  
30 of MTWA reached >12.5 °C (Kienast et al., 2008, 2011), suggesting the potential for more intense warming during  
31 MIS 5e, which in turn could be considered – at least in the amplitude – a representative analog for stronger modern  
32 warming in the Arctic than during the Lateglacial or early Holocene.~~

33 According to Rovere et al. (2016), the global sea level of MIS 5e might have reached levels 5 to 9.4 m higher than  
34 today. For north-eastern Siberia, especially for the Laptev Sea and the East Siberian Sea coastal regions, only  
35 scarce information on the MIS 5e coastline is available and outlined below. According to Ivanenko (1998), a  
36 distinctive feature of the Fadeevsky and Novaya Sibir islands (especially at their northern coasts; Figure 1) are  
37 widely distributed marine deposits (called the Kanarchak Formation), which are overlain by terrestrial Yedoma  
38 Ice Complex or, rarely, by terrestrial Holocene deposits. A smooth boundary between the marine and terrestrial  
39 strata is striking, indicating a continuous sedimentation regime and uninterrupted transition from marine to  
40 terrestrial conditions. According to Alekseev et al. (1991a, 2001), the lower part of the sections consists of marine  
41 terrace deposits, assumed to have formed during the LIG (Kazantsevo period in Russian). The sandy series

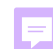



1 corresponding to the Kazantsevo transgression overlays the marine terrace deposits, which are today situated at 8-  
2 10 m above sea level (a.s.l.). Remnants of the marine terrace deposits with mollusk fauna are widely distributed  
3 and well expressed on the Novaya Sibir, Fadeevsky, and Kotel'ny islands, mainly in the estuarine parts of river  
4 valleys. Later studies on Novaya Sibir and Fadeevsky islands were undertaken by Basilyan et al. (2010), Tumskoy  
5 (2012), and Nikolskiy et al. (2017), including first detailed investigations of the Kanarchak Formation that contains  
6 a prominent massive ground ice body. These studies recognized the massive ground ice as a relic of a late mid-  
7 Pleistocene (MIS 6) glaciation, and the upper part of the Kanarchak Formation was assigned to the LIG (Basilyan  
8 et al., 2010). We conclude that the northern coast of the Fadeevsky and Novaya Sibir islands is characterized by  
9 marine and coastal deposits of the LIG, which delineate the approximate position of the coastline during MIS 5e.  
10 Linking the paleoecologic records from the different locations in order to understand the regional context requires  
11 a robust geochronological framework. While Lateglacial and early Holocene thermokarst deposits are commonly  
12 well-constrained via radiocarbon dating (Wetterich et al., 2009), the chronostratigraphy of MIS 5 deposits  
13 attributed to the LIG suffers from large dating uncertainties of the available dating methods that include  
14 radioisotope disequilibria ( $^{230}\text{Th}/\text{U}$ ) of peat (Schirmermeister et al., 2002; Wetterich et al., 2016) and optically  
15 stimulated luminescence of quartz (OSL) or infrared stimulated luminescence of feldspar (IRSL) (Andreev et al.,  
16 2004; Opel et al., 2017). Therefore, the highly variable millennial climate dynamics from about 130 to 80 ka during  
17 MIS 5 (expressed as MIS 5 sub-stages 5e to 5a; Shackleton et al., 2003) are not yet resolved in terrestrial permafrost  
18 records and hinder the paleoclimatic interpretation of permafrost-preserved fossil proxy records.  
19 Our study summarizes previously published and newly obtained data from coastal permafrost exposures at both  
20 coasts of the Dmitry Laptev Strait to (1) provide new luminescence dates that constrain the timing of the LIG and  
21 thus to resolve regional MIS 5e climate variability better; (2) summarize cryolithological and geochemical  
22 characteristics of LIG deposits that capture depositional processes and preservation conditions; (3) deduce the  
23 ecological response and quantify the paleoclimatic parameters linked to LIG warming as reflected by fossil proxy  
24 data of vegetation, terrestrial and aquatic invertebrates, and compare them with results of climate model  
25 simulations; and (4) discuss LIG climate-ecology-permafrost dynamics and their potential as analogs for the  
26 ongoing and future climate warming in the terrestrial Siberian Arctic.

## 27 **2 Study sites**

28 The study sites stretch along the Dmitry Laptev Strait at the southern coast of Bol'shoy Lyakhovsky Island and the  
29 opposite mainland coast of Oyogos Yar (Figure 1). Various coastal outcrops, thaw slumps, and drill sites were  
30 studied along an approximately 16.5 km long section west and east of the Zimov'e River mouth on Bol'shoy  
31 Lyakhovsky (Figure 1b; Figure 2a) and along a 5.5 km long section west of the Kondrat'eva River mouth at the  
32 Oyogos Yar mainland coast (Figure 1c; Figure 2b). A recent review of the permafrost research history of the  
33 Dmitry Laptev Strait shores is provided in Tumskoy and Kuznetsova (2022).  
34 The modern climate of the study area is characterized by short, cold summers with a mean July temperature  
35 (MTWA) of 2.5 to 2.8 °C (WMO stations 216470, 216360). Long, harsh winters of eight months are characterized  
36 by low light availability and low temperatures, with a mean January temperature (mean temperature of the coldest  
37 month, MTCO) of -34.4 to -33.1°C. The annual precipitation varies from 243 to 262 mm, yet overall conditions  
38 are humid due to low evaporation rates and poor drainage of the wet active layer during summer (Hersbach et al.,  
39 2020, ERA5, 1990-2019). The area belongs to the Arctic tundra subzone (Chernov and Makarova, 2008), more



1 specifically, the moist to dry tundra vegetation zone with open to continuous plant cover (G2) on Bol'shoi  
2 Lyakhovsky Island and sedge/grass, moss wetland (W1) on the Oyogos Yar coast (CAVM Team, 2003).  
3 The region is underlain by continuous permafrost with a thickness of 400-600 m, and the mean annual ground  
4 temperature is about  $-14$  to  $-12$  °C (Yershov, 1989). The mean thickness of the active layer is about 30-40 cm  
5 (Schwamborn and Wetterich, 2015).

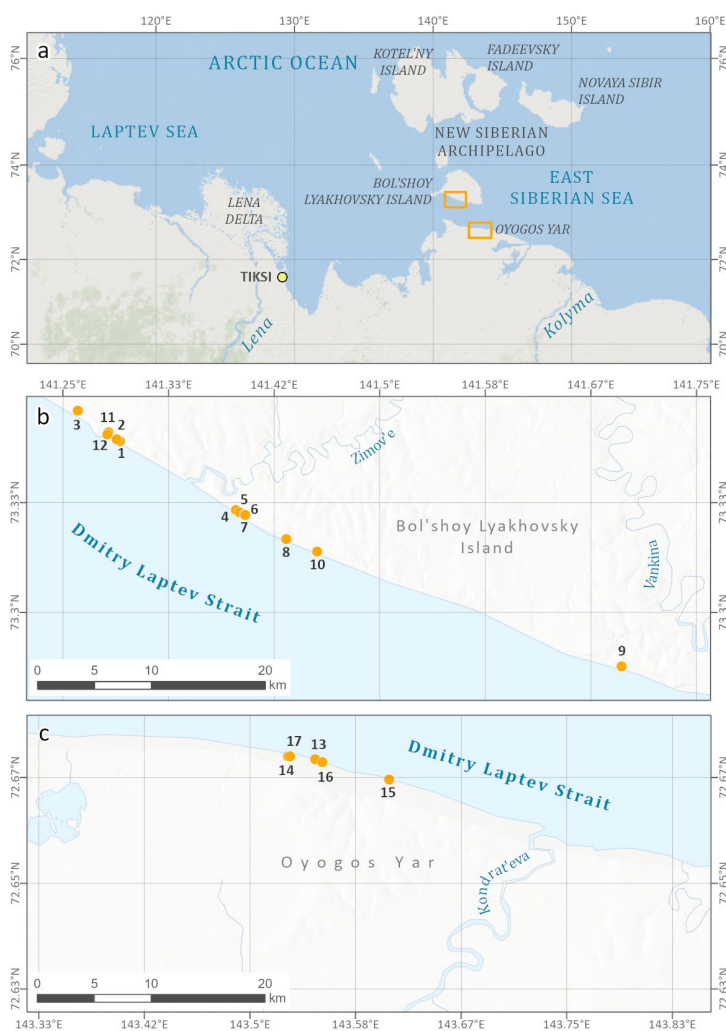

6

7 **Figure 1.** Study area (a) in northeastern Siberia along the Dmitry Laptev Strait, (b) at the southern coast of Bol'shoi  
8 Lyakhovsky Island, and (c) the opposite mainland coast of Oyogos Yar. The locations of sampling profiles of LIG  
9 deposits are also indicated in Table A1 and Figure 2. The maps were compiled by Sebastian Laboor, AWI Potsdam,  
10 using World Imagery (Credits: Esri, Maxar, GeoEye, Earthstar Geographics, CNES/Airbus DS, USDA, USGS,  
11 AeroGRID, IGN, and the GIS User Community) and World Ocean Base (Credits: Esri, Garmin, GEBCO, NOAA  
12 NGDC, and other contributors).

13



1 In its western, central, and eastern parts, Bol'shoy Lyakhovsky Island is shaped by hills reaching elevations of  
 2 about 100 to 300 m a.s.l. In the central part and the coastal region, Yedoma uplands up to 40 m a.s.l. are present  
 3 and dissected by large thermokarst basins (alases), wide and flat thermo-erosional valleys (logs), gullies or ravines  
 4 (ovrags). The southern coast of Bol'shoy Lyakhovsky Island is characterized by vast retrogressive thaw slumps  
 5 (thermo-cirques), the mouth of the Zimov'e River, and numerous smaller streams. Widespread thermokarst  
 6 characterizes the Oyogos Yar mainland coast (Günther et al., 2013), covered by polygonal peatlands, shallow  
 7 thermokarst lakes, and erosional remnants of Yedoma uplands. The general stratigraphy of both coastal sections  
 8 with deposits between MIS 7 and MIS 1 is presented in Figure 2.  
 9

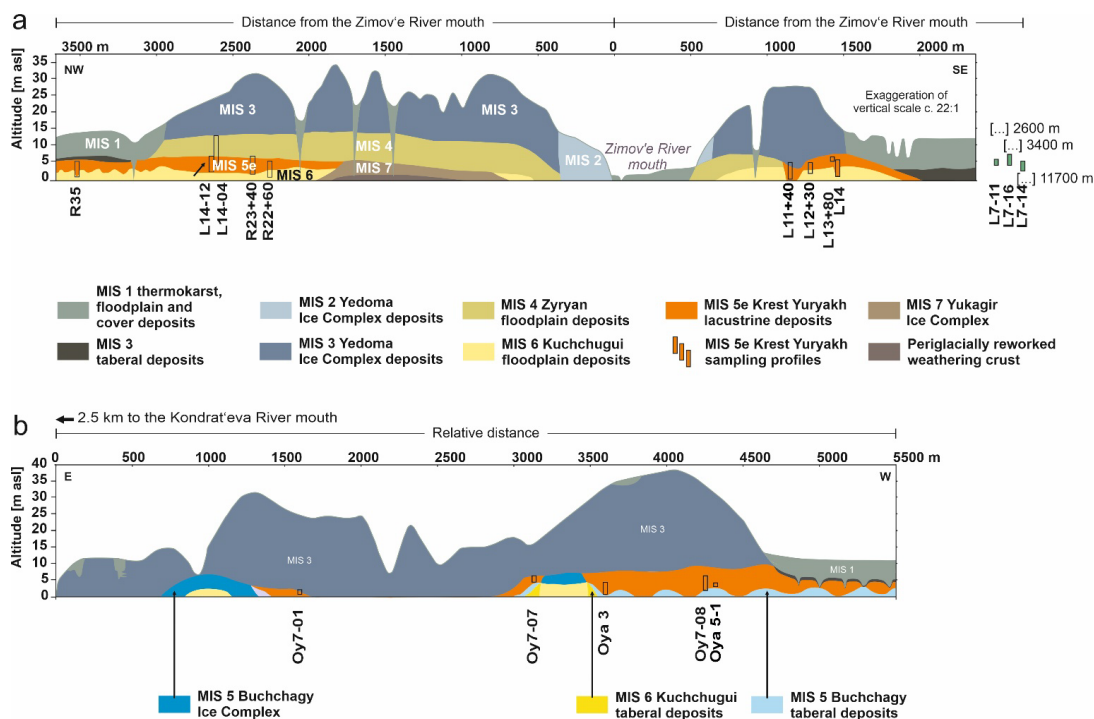

10

11 **Figure 2.** Cryostratigraphic schematics of both coasts of the Dmitry Laptev Strait with LIG (Krest-Yuryakh) profile  
 12 locations: (a) Bol'shoy Lyakhovsky Island (re-drawn from Andreev et al., 2009 and Wetterich et al., 2021), (b) Oyogos  
 13 Yar coast (re-drawn from Tumsky and Kuznetsova, 2022).

### 14 3 Material and methods

#### 15 3.1 Fieldwork

16 Field studies on both sides of the Laptev Strait were conducted in the summers of 1999, 2002, 2007, and 2014, as  
 17 well as in spring of 2014 (Schirrmeister et al., 2000, 2003; Boike et al., 2008; Schwamborn and Wetterich, 2015).  
 18 After an initial survey, selected coastal exposures (Figure 2) were sampled in detail. Vertical profiles were cleaned  
 19 with spades and hoes to remove the outermost thawed material. The exposed sequences were surveyed, described,  
 20 photographed, and sketched to document sediment structures, cryostructures, color, and visible organic content.  
 21 The frozen deposits were sampled for further studies using hammers and small axes. In spring 2014, a Russian





1 drill rig (KMB3-15M) mounted on an all-terrain vehicle was used to retrieve permafrost cores on Bol'shoi  
2 Lyakhovsky Island using a rotary mechanism in dry holes.  
3 Sections of Krest-Yuryakh deposits sampled at the southern coast of Bol'shoi Lyakhovsky Island included the  
4 profiles R35, R22+60, R23+40, L11+40, L12+30, L13+80 and L14 in 1999; the profiles L7-14, L7-11 and L7-16  
5 in 2007; and the profile L14-12 and the permafrost core L14-04 in 2014 (Figure 2; Table A1). On the Oyogos Yar  
6 coast, the profiles Oya-3-10, Oya-3-11, and Oya 5-1 were obtained in 2002, and the profiles Oy7-01, Oy7-07, and  
7 Oy7-08 A-C in 2007 (Figure 2; Table A1).

8 Except for the permafrost core, the ice content of all permafrost samples was determined in the field in closed  
9 aluminum boxes. The samples were weighed while still frozen, dried in a field oven, and weighed again. The  
10 absolute gravimetric ice content is the ratio of the ice mass in a sample to the dry sample mass, expressed as a  
11 percentage (van Everdingen, 2005).

12 In 1999, screening for rodent remains using a woody screen box with a metallic screen (1mm mesh) and a motor  
13 pump was carried out. Although no rodents were found, the screened sediment was used to extract insects. In  
14 addition, insects were collected by screening the thawed sediment with a 0.4 mm mesh. Plant macrofossils were  
15 excavated from insect samples and large (up to 2 kg) bulk samples. Large mammal bones were collected from the  
16 section and below at the seashore. Some small rodent teeth were picked up from mineral and plant debris below  
17 the section.

18  
19

### 20 3.2 Luminescence dating

21 Previous luminescence sampling in 1999 on Bol'shoi Lyakhovsky is described in Andreev et al. (2004, 2007) and  
22 on Oyogos Yar in Opel et al. (2017). In 2014, Krest-Yuryakh deposits were sampled at the southern coast of  
23 Bol'shoi Lyakhovsky Island for luminescence dating (profile L14-12, 73.34055°N, 141.28498°E; Figure 1). After  
24 cleaning and cryolithological description, the ca. 7 m high steep exposure was sampled for luminescence dating at  
25 heights of 4.5 m a.s.l. (L14-12-OSL1) and 2.7 m a.s.l. (L14-12-OSL3) (Table A1). We used a HILTI TE6 - A36  
26 cordless rotary hammer to obtain frozen cores protected from sunlight that were packed dark, stored in an ice cellar  
27 next to the camp at -4 °C, and kept frozen until arrival in the laboratory.

28 The processing of sample cores aimed at extracting K-feldspars with grain sizes of 40–63 μm (L14-12-OSL1, L14-  
29 12-OSL3) and 63–90 μm (L14-12-OSL1). Coarser material (>100 μm) was lacking, or only a minor component,  
30 and the quartz OSL signals were close to saturation. Pure mineral extracts were obtained via carbonate and organic  
31 removal (10% HCl and 30% H<sub>2</sub>O<sub>2</sub>, respectively), feldspar flotation (0.2% HF, pH 2.4–2.7, dodecylamine) for  
32 efficient separation from quartz, density separation to enrich K feldspars (2.53–2.58 g cm<sup>-3</sup>) and 5 min final etching  
33 in 10% HF. Extracted medium-sized feldspar grains were used to prepare sets of 24 aliquots with a 2 mm diameter.  
34 Measurements and analyses for age estimation were based on 20 aliquots, while four aliquots per sample and grain  
35 size fraction were used for quality tests. For L14-12-OSL3, five additional aliquots were used in equivalent dose  
36 screening sequences to optimize the regenerative dose points. The IRSL signals of feldspars were measured using  
37 a TL/OSL DA-20 reader (Bøtter-Jensen et al., 2003) equipped with a <sup>90</sup>Sr beta irradiation source (4.95 Gy min<sup>-1</sup>).  
38 Signals were stimulated at 870 nm (IR diodes, 125°C for 100 s) and detected through a 410 nm optical interference  
39 filter (Krbetschek et al., 1997).

40 The measurement sequence followed the single-aliquot regenerative dose (SAR) protocol according to Murray  
41 and Wintle (2000), including cycles to record recycling ratios and recuperation and to correct for sensitivity





1 changes. Preheat and cut-heat temperatures were set to 230 °C and 160 °C, respectively, according to preheat tests.  
2 Emitted signals were recorded for 100 s to ensure the acquisition of pure background signals at the end of each  
3 measurement cycle. Dose-recovery tests (Murray and Wintle, 2003) confirmed suitable luminescence properties  
4 under the chosen conditions with coefficients of variations between 3.8% and 5.3%. The data processing was  
5 performed using the R package “Luminescence” (Kreutzer et al., 2012), version 0.9.20.  
6 The datasets (n = 20 to 25) revealed equivalent dose distributions of low skewness (below 0.8%) and low standard  
7 deviations (below 5%). No evidence of insufficient bleaching or significant post-depositional mixing was found,  
8 and hence, paleodose estimates were based on the Central Age Model (CAM) (Galbraith et al., 1999). The CAM-  
9 based paleodose was then processed together with all sample-specific dose rates (sediment-internal, mineral-  
10 internal, cosmic) and correction (grain sizes, water content, sediment cover, etc.) parameters using the online  
11 DRAC calculator (Durcan et al., 2015). For the mineral-internal dose rate of the K feldspars, a potassium content  
12 of  $12.5 \pm 0.5\%$  was assumed (Huntley and Baril, 1997).

13

### 14 3.3 Sediment analyses

15 In the laboratory, the sediment samples were freeze-dried, carefully manually homogenized, and split into sub-  
16 samples for sedimentological, geochemical, and paleo-ecological analyses. Grain-size distribution was analyzed  
17 using a laser-particle analyzer (Beckmann Coulter LS 200) and computed with GRADISTAT 4.0 software (Blott  
18 and Pye, 2001). The mass-specific magnetic susceptibility (MS) was measured using a Bartington MS2 instrument  
19 (MS2B sensor), and values are given in SI units (Le Système International d'Unités;  $10^{-8} \text{ m}^3 \text{ kg}^{-1}$ ). The total organic  
20 carbon (TOC) and total nitrogen (TN) contents were measured by a carbon-nitrogen-sulfur (CNS) analyzer  
21 (Elementar Vario EL III), and the total organic carbon to total nitrogen ratio was calculated as TOC/TN ratio.  
22 Stable carbon isotopes ( $\delta^{13}\text{C}$ ) of TOC were measured until 2014 with a Finnigan DELTA S mass spectrometer  
23 coupled to a FLASH element analyzer and a CONFLO III gas mixing system after the removal of carbonates with  
24 10% HCl in Ag-cups and combustion to  $\text{CO}_2$ . The accuracy of the measurements was determined by parallel  
25 analysis of internal and international standard reference material. The analyses were accurate to  $\pm 0.2\%$ . Later, the  
26 measurement was undertaken using a Thermo Scientific Delta V Advantage isotope ratio MS equipped with a  
27 Flash 2000 organic elemental analyzer using helium as a carrier gas. The accuracy was better than  $\pm 0.15\%$ . The  
28  $\delta^{13}\text{C}$  values are expressed in delta per mil notation ( $\delta$ , ‰) relative to the Vienna Pee Dee Belemnite (VPDB)  
29 standard.

30 Values are given as per mil (‰) difference from the Vienna Pee Dee Belemnite (VPDB) standard for  $\delta^{13}\text{C}$  and  
31 from nitrogen in ambient air (AIR) for  $\delta^{15}\text{N}$ . The accuracy was better than  $\pm 0.15\%$  for  $\delta^{13}\text{C}$  and  $\pm 0.2\%$  for  $\delta^{15}\text{N}$ .

32

### 33 3.4 Paleo-ecological analyses and paleoclimate reconstructions

34 Pollen data are available (Table A1) from Bol'shoy Lyakhovsky Island from Krest-Yuryakh deposits in profiles  
35 R22+60, L11+40, L12+30 and L14 (Andreev et al., 2004), R23+40 (Andreev et al., 2009), R35 (Ilyashuk et al.,  
36 2006), L7-14 (Wetterich et al., 2009), and in the drill core and hand pieces of the permafrost core L14-04  
37 (Zimmermann et al., 2017). On Oyogos Yar, pollen data were obtained from profiles Oy7-08 (Wetterich et al.,  
38 2009) and Oya 5-1 (Kienast et al., 2011). The pollen sample preparation followed standard methods (e.g., Andreev  
39 et al., 2004).



1 Pollen-based climate reconstructions were based on a **northern hemispheric** modern pollen training dataset  
2 comprising 15,379 sites in Eurasia and North America (Herzschuh et al., 2023). Only terrestrial pollen taxa  
3 (including Cyperaceae) were used for reconstructions, while aquatic pollen taxa, as well as spores from mosses,  
4 ferns, fungi, and algae, were excluded. Woody taxa, as well as some very common herbaceous taxa (e.g.,  
5 *Artemisia*, *Thalictrum*, or *Rumex*), were harmonized to the genus level, and all other herbaceous taxa were  
6 harmonized to the family level (Herzschuh et al., 2022). Site-specific mean July temperatures ( $T_{July}$ ) and annual  
7 precipitation ( $P_{ann}$ ) were derived from WorldClim 2 version 2.1 (<https://www.worldclim.org>; Fick and Hijmans,  
8 2017) by extracting the climate data at the location of the modern samples. The pollen taxa in the fossil pollen  
9 samples noted above were harmonized in the same way as the taxa in the modern training dataset. For each  
10 location, we calculated the geographic distance between each sampling site in the modern training dataset and the  
11 fossil pollen record. Climate reconstructions were performed using the modern analog technique (MAT, Overpeck  
12 et al., 1985) by applying the MAT function from the rioja package (version 0.9-21, Juggins, 2019) for R (R Core  
13 Team, 2020) to the pollen percentages of the selected fossil pollen taxa, looking for seven analogs between the  
14 pollen data and the calibration dataset. The dissimilarity between the fossil samples and the modern pollen  
15 assemblages was determined by the squared-chord distance of the percentage data (Cao et al., 2014; Simpson,  
16 2012).

17 Plant macrofossils were examined (Table A1) in profiles R22+60, L12+30, R35 (Kienast et al., 2008), and L7-11  
18 (Schneider, 2010) on Bol'shoy Lyakhovsky Island and in profile Oya 5-1 on Oyogos Yar (Kienast et al., 2011).  
19 Sample preparation followed standard methods (e.g., Kienast et al., 2008). The MTWA tolerances of plant species  
20 identified by macrofossils were calculated by correlating their modern distribution in Yakutia, pooled in the online  
21 database GBIF (2023), which comprises geocoded distribution data from maps published in the Flora of Siberia  
22 (Artemov and Egorova, 2021), permanently updated iNaturalist research-grade observations (iNaturalist, 2023)  
23 and records from literature on local floras of Russia (Bochkov and Seregin, 2022) with monthly mean temperatures  
24 from the updated database of Leemans and Cramer (1991). We considered only the Yakutian distribution of  
25 recovered plant species because of the relative climatic stability of

26 Yakutia throughout the late Quaternary and the related conservative genetic configuration of plant populations in  
27 Yakutia with a low percentage of polyploidy and a narrower ecological tolerance in comparison with more western  
28 populations. The temperature range of a certain species was determined by the correlation of dot occurrences  
29 within Yakutia published in GBIF (2023) with the mean July temperature as MTWA at the closest grid point with  
30 a resolution of 0.5° longitude/latitude (Leemans and Cramer, 1991). The temperature extremes within the Yakutian  
31 distribution range, e.g., the northernmost occurrence as the minimum and the presence in the Central Yakutian  
32 Plain with an MTWA of up to 18.4 °C as the possible maximum, reveal the temperature range of a species. The  
33 minimum requirement for MTWA of the most thermophilous species, together with the maximum MTWA  
34 tolerance of the most cold-adapted plant within a paleo-flora, reveal the temperature interval (or mutual climatic  
35 range, MCR) for the coexistence of all species. We focused on species with particularly high (boreal) and low  
36 (arctic) temperature demands (Table S1).

37 Sedimentary ancient DNA (*sedaDNA*) refers to the desoxyribonucleic acid (DNA) preserved in sedimentary  
38 deposits that stem from biological material such as plants, animals, and microorganisms that live in or near the  
39 depositional environment. In permafrost, *sedaDNA* is predominantly local in origin (Alsos et al., 2018), and its  
40 source can be derived from preserved plant tissues, from extracellular DNA bound to mineral particles, and from  
41 feces, and only to a lesser degree from pollen (Crump, 2021). That allows for the reconstruction of past community



1 composition, diversity, and temporal dynamics up to geological timescales (Courtin et al., 2022; Kjær et al., 2022).  
2 We used DNA metabarcoding to amplify and sequence a short plant-specific genetic marker (see details in  
3 Zimmermann et al., 2017). DNA metabarcoding was successfully applied (Table A1) to seven samples of the  
4 permafrost core L14-04, three samples from profile L14-04-B, and seven samples of profile L14-04-C  
5 (Zimmermann et al., 2017).  
6 Lipid biomarkers were analyzed in permafrost core L14-04. A total of 10 samples were processed, and microbial  
7 ether lipids (branched and isoprenoid glycerol dialkyl glycerol tetraethers; brGDGTs, isoGDGTs) were analyzed  
8 as described by Kusch et al. (2019). The methylation index of 5-methyl branched tetraethers ( $MBT'_{SME}$ ) was  
9 calculated using  $MBT'_{SME} = (Ia + Ib + Ic)/(Ia + Ib + Ic + Iia + Iib + Iic + IIIa)$  (de Jonge et al., 2014). The Isomer  
10 Ratio (IR) of penta- and hexamethylated brGDGTs was calculated as  $IR = (IIa' + IIIa')/(IIa + IIIa + IIa' + IIIa')$   
11 (Yang et al., 2015). We use the  $MBT'_{SME}$ -based Air Growing Season Temperature (Air GST, April to October)  
12 calibration (calibration D;  $Air\ GST = -3.82 + 22.71 * MBT'_{SME} + 8.78 * IR$ ) recently developed by de Jonge et al.  
13 (2024) since it is the only calibration available that accounts for seasonal production bias by including soils frozen  
14 during part of the year and corrects for the influence of pH on  $MBT'_{SME}$ . This calibration has a residual square  
15 mean error of 2.2°C. The branched and isoprenoid tetraether index (BIT; Hopmans et al., 2004) was calculated  
16 following  $BIT = (Ia + Iia + IIIa + Iia' + IIIa')/(Ia + Iia + IIIa + Iia' + IIIa' + crenarchaeol)$ , and the ratio of isoGDGTs  
17 to brGDGTs ( $Ri/b$ ; Xie et al., 2012) was calculated using  $Ri/b = \Sigma isoGDGTs / \Sigma brGDGTs$ . For details about the  
18 chemical structures and nomenclature of GDGTs, we refer to Kusch et al. (2019).  
19 Terrestrial insect remains (mostly beetles) were studied (Table A1) in four samples from Bol'shoy Lyakhovsky  
20 Island (L-11-B17, L-11-B19, L-12+30-B-18, R-22-B15, R-22-B16; Andreev et al., 2004, 2009; Kuzmina, 2015b)  
21 and one sample from Oyogos Yar (Oya 5-1; Kienast et al., 2011). Sample preparation for terrestrial insect fossils  
22 followed standard methods (Kuzmina, 2015b). The MCR method described above for plant macrofossils allows  
23 reconstructing the MTWA and MTCO of the year by overlapping coexistence intervals of several species of insects  
24 (or any other taxa) in single samples (Atkinson et al., 1987). The MCR method is widely used on fossil beetle  
25 remains in Europe mainly because of the continuous research project and database BugsCEP (Buckland, 2007,  
26 2014). The method has been adapted for North America (Elias, 2000, 2001) for the study of the late Quaternary  
27 beetle fauna of East Beringia. To evaluate the LIG warming in the Dmitry Laptev Strait region, two sources of  
28 thermal requirements are used, which are a West Beringian list (including phytophagous species; Alfimov et al.,  
29 2003) and a Transberingian list (excluding phytophagous species; Elias, 2000), both based on museum collections.  
30 Chironomids were studied (Table A1) in profile R35 (Ilyashuk et al., 2006) on Bol'shoy Lyakhovsky Island and  
31 profile Oya 5-1 on Oyogos Yar (Kienast et al., 2011). Chironomid sample preparation followed standard methods  
32 (Brooks et al., 2007). For the paleotemperature reconstruction from chironomid data, we inferred the  $T_{July}$   
33 (MWTa) by using a North Russian (NR) chironomid-based temperature inference model (WA-PLS, 2 component;  
34  $r^2$  boot = 0.81; RMSEP boot=1.43°C) based on a modern calibration data set of 193 lakes and 162 taxa from  
35 northern Russia (spanning from 61 to 75°N, and 50 to 140 °E,  $T_{July}$  range 1.8 to 18.8 °C; Nazarova et al., 2015).  
36 Water depths (WD) were reconstructed using a modern chironomid-based calibration dataset from East Siberia  
37 that includes 147 lakes (WD range 0.1 to 17.1 m). The one-component WA-PLS model had the best performance:  
38  $r^2$  boot = 0.62, RMSEP boot = 0.35 m for WD reconstructions (Nazarova et al., 2011). Both the  $T_{July}$  NR and the  
39 WD East Siberia models were previously applied for paleoclimatic inferences in East Siberia and the Russian Far  
40 East and demonstrated high reliability of the reconstructed parameters (Syrykh et al., 2017; Nazarova et al., 2017a,  
41 2017b; Wetterich et al., 2018). Chironomid-based reconstructions were performed in C2 version 1.7.7 (Juggins,



1 2007). The data were square-rooted to stabilize species variance. Information on the ecology of chironomid taxa  
2 was taken from Brooks et al. (2007), Moller Pilot (2009), and Nazarova et al. (2008, 2011, 2015, 2017a).  
3 Cladocera were newly studied (Table A1) in profile L7-11 on Bol'shoi Lyakhovskiy Island, in profiles Oya-3-11,  
4 Oy7-01, Oy7-08, and in profile Oya 5-1 (Kienast et al., 2011) on Oyogos Yar. The cladocera sample preparation  
5 followed the standard methods (e.g., Kienast et al., 2011).  
6 Mollusk fossil remains were obtained from samples BL-R-M1 (taken 1.8 m a.s.l. at profile R 41+50 m in 1999)  
7 and BL-R-M4 (taken at profile R32 in 1999) on Bol'shoi Lyakhovskiy Island (E.E. Taldenkova, T.A. Yanina,  
8 unpublished data (Table A1), and from sample Oya 5-1 on Oyogos Yar (Kienast et al., 2011). The mollusk sample  
9 preparation followed standard methods (e.g., Kienast et al., 2011).  
10 Ostracod valves from Bol'shoi Lyakhovskiy Island were studied in profiles R23+40, L11+40 (S. Wetterich,  
11 unpublished, Table A1), L7-14 (Wetterich et al., 2009) and L7-11 (Schneider, 2010), and on Oyogos Yar in profiles  
12 Oy7-08 (Wetterich et al., 2009), Oy7-01 (Schneider, 2010) and Oya 5-1 (Kienast et al., 2011). The ostracod sample  
13 preparation followed standard methods (e.g., Wetterich et al., 2009).  
14

### 15 3.5 Clumped isotope analysis of biogenic carbonates and derivation of lake water $\delta^{18}\text{O}$

16 An emerging method to derive quantitative paleotemperature estimates from ostracods is clumped isotope  
17 thermometry (Song et al., 2022). The advantage of this method is its independence of the temperature estimate  
18 from the  $\delta^{18}\text{O}$  signal of the water from which the ostracod and mollusk carbonate formed (Eiler, 2007). Two  
19 ostracod species (*Cytherissa lacustris*, *Candona candida*) and a bivalve mollusk (*Pisidium casertanum*) were  
20 selected from sample Oya 5-1 for clumped isotope analysis based on their relatively high abundance providing  
21 sufficient sample material. Complete adult valves, with no visual evidence of dissolution or degradation, were  
22 selected and cleaned. We manually removed sediment contamination under a binocular microscope with a  
23 paintbrush and deionized water prior to the homogenization of the carbonate with a clean agate pestle and mortar.  
24 Clumped isotope analysis was conducted in the NICEST laboratory at Northumbria University on a Nu Instruments  
25 Perspective IRMS coupled with a NuCarb dual inlet prep system. Powdered samples of  $325 \pm 25 \mu\text{g}$  were loaded  
26 into sample vials, evacuated, and reacted with concentrated orthophosphoric acid at  $70^\circ\text{C}$ . Analyte gas was  
27 dehydrated and cleaned following established methodologies (e.g., Bernasconi et al., 2018; Eiler and Schauble,  
28 2004; Petersen et al., 2015). Briefly,  $\text{CO}_2$  was dehydrated at  $-80^\circ\text{C}$  in two liquid nitrogen-cooled coldfingers and  
29 scrubbed of contaminants by passing through a static 1 cm cryotrap filled with PorapakTM Q absorbent (Waters  
30 Corporation) cooled to  $-30^\circ\text{C}$ . The sample preparation system was baked out at  $80^\circ\text{C}$  after each measurement to  
31 avoid cross-contamination. A minimum of 17 replicate measurements was made of each sample, sufficient to  
32 achieve standard errors  $\leq 0.01 \text{‰}$  (i.e., 95% confidence interval  $< 0.02 \text{‰}$ ). Long-term instrument performance  
33 was monitored with an internal standard, POL-2, giving a long-term  $\Delta_{47}$  external standard deviation of  $0.032 \text{‰}$ .  
34 Isotopic outliers (stable and clumped) and samples with elevated  $\Delta_{48}$  values, indicative of sample contamination,  
35 were discarded before final  $\Delta_{47}$  values were calculated in the free software Easotope ([www.easotope.org](http://www.easotope.org); John and  
36 Bowen, 2016) using the IUPAC parameters for  $^{17}\text{O}$  correction and calculation of isotopic ratios for VPDB and  
37 VSMOW (Bernasconi et al., 2018; Brand et al., 2010; Daëron et al., 2016). Internal  $\Delta_{47}$  values were projected onto  
38 the carbon dioxide equilibrium space (ICDES-90) using standards ETH1, ETH2, and ETH3 (ETH Zurich,  
39 Bernasconi et al., 2018), following the methods of Dennis et al. (2011), using ICDES  $\Delta_{47}$  values (Bernasconi et  
40 al., 2021). Clumped isotope-based carbonate precipitation temperatures ( $T_{\Delta_{47}}$ ) were calculated using the



1 composite calibration of Anderson et al. (2021), which has recently been shown to produce reliable temperature  
2 estimates for ostracods (Marchegiano et al., 2024).  
3 We determined the  $\delta^{18}\text{O}$  of the water in which ostracod carbonates formed using  $T_{\Delta 47}$  values and the  $\delta^{18}\text{O}$  values  
4 of fossil ostracod and bivalve carbonate (measured during clumped isotope analysis). A constant  $\delta^{18}\text{O}$  vital offset  
5 +2.2 ‰ to *Candona candida*, +1.2 ‰ to *Cytherissa lacustris*, and +0.86 ‰ to *Pisidium casertanum* (von  
6 Grafenstein et al., 1999) was applied before  $\delta^{18}\text{O}$  of the formation waters were calculated using the calibration of  
7 Coplen (2007) to describe the temperature-dependent water-calcite oxygen isotope fractionation.  
8

### 9 3.6 Paleoclimate modeling

10 Within the framework of the 6th phase of the IPCC Climate Model Intercomparison Project (CMIP6), the  
11 PaleoMIP intercomparison project was endorsed, leading to the identification of several past time periods for  
12 paleo-climate simulations to focus on, following a standardized modeling protocol (Kageyama et al., 2018). One  
13 of these time periods is the LIG, with a center on the time slice around 127,000 years ago, which lead to modeling  
14 experiments summarized under the acronym lig127k. Monthly mean air temperature and precipitation are available  
15 from 12 different global coupled climate models in the lig127 experiment, providing between 100 and 700 years  
16 of data for the LIG for the calculation of long-term averages (climatological means). In order to provide a reference  
17 for these simulations, all models also provided simulations of the pre-industrial period (PIcontrol). Commonly,  
18 model results are presented as anomalies to this reference period to reduce the impact of systematic model biases  
19 in the results (delta change method, e.g., Maraun and Widmann, 2018). The horizontal resolution of the models  
20 varies between 100 km and 500 km (Table S8). Monthly mean temperatures of MTWA and MTCO were calculated  
21 from each model on the model's native grid, first finding the maximum and minimum monthly values for each  
22 year and then averaging over all years the model provided, both for the lig127k simulations and the pre-industrial  
23 simulations. To obtain the anomalies, the resulting values were subtracted from each other (lig127k minus  
24 PIcontrol). Mean annual precipitation (MAP) was calculated on each model's native grid, summing up monthly  
25 precipitation values. Then, climatological means were calculated, averaging the years the model provided for both  
26 the lig127 and the PIcontrol simulations. Anomalies were again obtained by subtracting both averages (lig127k  
27 minus PIcontrol). Estimates and uncertainties for the sample sites Bol'shoy Lyakhovsky and Oyogos Yar, as well  
28 as a generic reference point, were computed from the multi-model ensemble mean anomalies and of the grid cell  
29 values the sites fall in, without spatial interpolation. To visualize temperature and precipitation patterns of the  
30 Laptev Sea area, temporal averages of all models were regridded to a common  $1^\circ \times 1^\circ$  grid.

31 In order to compare the modeled anomalies with the absolute values determined from the proxies, it is necessary  
32 to account for the discrepancy between the pre-industrial reference used for the model and the observed pre-  
33 industrial time values. For temperature, we used the gridded temperature anomalies from NOAA GlobTemp V6,  
34 the most comprehensive gridded observational data record covering both present-day and pre-industrial climate  
35 (Huang et al., 2024), to obtain anomalies for the observed pre-industrial time (1850-1900, Allen et al., 2018). For  
36 the present-day reference time period in NOAA GlobTemp, the latest reanalysis product of the European Center  
37 for Medium-Range Weather Forecast, ERA5, was used as a basis to calculate the absolute values (methods in  
38 accordance with Allen et al. (2018) and Capron et al., (2014)). For pre-industrial precipitation, no equivalent data  
39 set to NOAA GlobTemp exists. Therefore, it was not possible to obtain absolute values for MAP from the  
40 PaleoMIP model anomalies. Instead, we use the multi-model ensemble mean. All models contributing to this

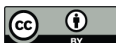

1 experiment use a present-day land-sea mask and sea level (Figure S3) that does not conform to the suggested land-  
2 sea mask of the area during the LIG. The warmest temperatures and mean annual precipitation are influenced by  
3 a site's proximity to the coast. In the models, the horizontal resolution influences the position of the coastline and  
4 its distance to the sample sites. The model grid layout also influences the partitioning between the water and land  
5 of the grid cells in which the sample sites are located. To estimate the impact of the differences in coastlines among  
6 the models as well as between the models and the conditions of the LIG, an additional reference point was chosen  
7 for computation of MTWA, MTCO, and MAP that is situated within a land grid cell in every model and as close  
8 to the sample sites as possible, referred to as LandPoint, situated at 71.2°N, 142°E (Figure S3).  
9 As a reference for the present day, monthly mean air temperatures and precipitation ERA5 were used to calculate  
10 MTWA, MTCO, and MAP. Values were calculated on the ERA5's native equal-area grid (nominal resolution  
11 about 35 km) and then interpolated onto a regular grid for plotting maps. Climatological means are calculated over  
12 the period 1990-2019 (WMO present-day climate reference period). Values for the sample sites and the reference  
13 point were taken from respective grid cell values without spatial interpolation. ~~Please note furthermore,~~ that we  
14 use the modern calendar instead of an adjusted angular calendar that would account for shifts in solstice and the  
15 related seasons during the LIG period caused by the high eccentricity of Earth's orbit around the sun. While  
16 studies like Shi et al. (2022) and Xu et al. (2024) demonstrate the profound impacts of using the classical calendar  
17 in particular in autumn, we expect the impacts on MTWA and MTCO calculations to be negligible because shifts  
18 in the position of a single month are small, especially winter and summer. We do not predefine which month of  
19 the year is considered warmest or coldest; rather, we determine them for each year individually.

## 20 **4 Results**

### 21 **4.1 Field observations**

22 Ice-wedge pseudomorphs of 1-3 m thickness of the Krest-Yuryakh stratum are exposed between 0.5-10 m a.s.l. in  
23 places along the southern coast of Bol'shoy Lyakhovsky Island (Figure 2a, Figure 3a). Such ice-wedge  
24 pseudomorphs are filled with alternating beds of peaty brownish plant detritus layers, partly with twig and wood  
25 fragments up to 5-8 cm in diameter and gray clayish silt layers. The thickness of individual layers varies from a  
26 few millimeters to 1-2 cm. Ripple bedding (ripples 1-2 cm high, 2-5 cm distance), finely laminated layers (each  
27 lamina 5-10 mm thick), and small-scale syn-sedimentary slumping structures are common (Figure 3b). Several  
28 layers contain 5-10 mm large mussel fragments. Larger twig fragments and peat inclusions of 2-3 cm are present.  
29 The cryostructure is dominantly massive, i.e., without visible ice structures. Only single thin ice veins (< 1 mm  
30 thick) are observed in places parallel to the sedimentary bedding. Besides ice-wedge pseudomorphs, there are also  
31 lacustrine deposits with horizontally alternating layers of well-laminated silty sand and peat.



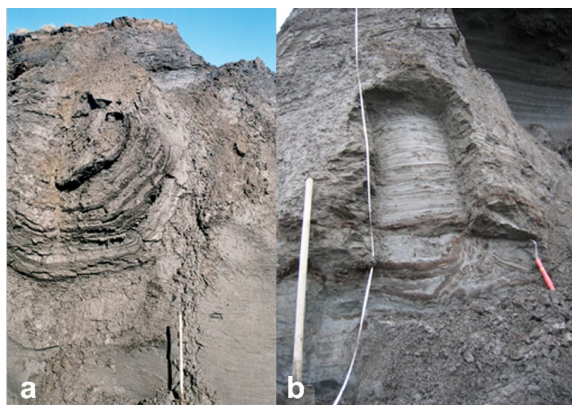

1  
2 **Figure 3.** LIG (Krest-Yuryakh) deposits exposed at the southern coast of Bol'shoy Lyakhovsky Island (Figure 2a): (a)  
3 ice-wedge pseudomorph (profile L7-11) with well-bedded lacustrine deposits and (b) laminated lacustrine deposits  
4 (profile L7-14 A-C) with alternate bedding of peaty and silty sand layers, and a slumping structure (next to the hoe).

5 Ice wedge pseudomorphs like those on Bol'shoy Lyakhovsky Island have been studied at various locations along  
6 the Oyogos Yar coast (Figure 4a). In addition, exposure of lacustrine gray silty fine sand (partly stratified) deposits  
7 was studied over a length of about 110 m at 1–3 m a.s.l. with two-meter-thick deposits (profile Oy7-01; Figure  
8 4b). About 50 m toward the east, the profile is characterized by alternating beds of grayish-brown silty material  
9 and dark plant detritus, and mollusk shells.

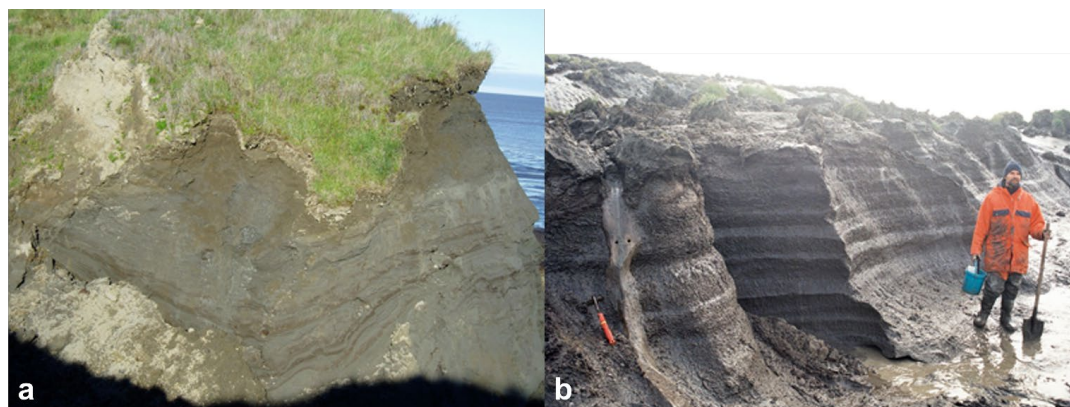

10  
11 **Figure 4.** LIG (Krest-Yuryakh) deposits at the Oyogos Yar coast (Figure 2b): (a) ice-wedge pseudomorph of alternately  
12 bedded peat and silty sand layers (ca. one meter high from the bottom to the grass cover); (b) stratified lacustrine  
13 deposits (profile Oy7-01) above the beach.

14

#### 15 **4.2 Luminescence dating**

16 After preparation, two samples from stratified lacustrine Krest-Yuryakh deposits (profile L14-12) revealed  
17 sufficient material for IRSL dating of one sub-sample in the coarse silt fraction (40-63  $\mu\text{m}$ ) and two sub-samples  
18 in the fine sand fraction (63-90  $\mu\text{m}$ ). The obtained ages range from  $127.3 \pm 6.1$  ka to  $117.6 \pm 6.0$  ka (Table 1). The





1 three ages agree within errors, nevertheless the luminescence signal dispersion corresponding to the oldest age  
2 shows a slightly higher skewness and hence, indicates a slight overestimation.

3

4 **Table 1: IRSL sample characteristics, including paleodose and dose rate parameters.**

| Sample ID<br>(Grain size fraction) |                        | L14-12-OSL3<br>(63-90 $\mu\text{m}$ ) | L14-12-OSL1<br>(63-90 $\mu\text{m}$ ) | L14-12-OSL1<br>(40-63 $\mu\text{m}$ ) |
|------------------------------------|------------------------|---------------------------------------|---------------------------------------|---------------------------------------|
| Paleodose parameters               |                        |                                       |                                       |                                       |
| n                                  |                        | 25                                    | 20                                    | 20                                    |
| Mean                               | [Gy]                   | 295.1 $\pm$ 1.2                       | 287.5 $\pm$ 2.7                       | 271.9 $\pm$ 0.6                       |
| Standard deviation                 | [%]                    | 5.8                                   | 4.2                                   | 2.8                                   |
| Skewness                           |                        | 0.2                                   | 0.8                                   | 0.4                                   |
| Coefficient of variation           | [%]                    | 5.1                                   | 3.8                                   | 5.3                                   |
| CAM                                | [Gy]                   | 295.2 $\pm$ 3.5                       | 287.2 $\pm$ 3.14                      | 271.8 $\pm$ 2.9                       |
| Dose rate parameters               |                        |                                       |                                       |                                       |
| <sup>238</sup> U-series            | [Bq kg <sup>-1</sup> ] | 28.11 $\pm$ 0.90                      | 20.96 $\pm$ 0.72                      | 20.96 $\pm$ 0.72                      |
| <sup>232</sup> Th-series           | [Bq kg <sup>-1</sup> ] | 31.14 $\pm$ 1.40                      | 24.22 $\pm$ 1.07                      | 24.22 $\pm$ 1.07                      |
| <sup>40</sup> K                    | [Bq kg <sup>-1</sup> ] | 475.32 $\pm$ 1.82                     | 481.98 $\pm$ 1.66                     | 481.98 $\pm$ 1.66                     |
| Water content                      | [%]                    | 35 $\pm$ 5                            | 35 $\pm$ 5                            | 35 $\pm$ 5                            |
| Height                             | [m a.s.l.]             | 2.7                                   | 4.5                                   | 4.5                                   |
| Cover thickness                    | [m]                    | 30                                    | 28                                    | 28                                    |
| Total dose rate                    | [Gy ka <sup>-1</sup> ] | 2.6 $\pm$ 0.1                         | 2.4 $\pm$ 0.1                         | 2.4 $\pm$ 0.1                         |
| Age                                | [ka]                   | 117.6 $\pm$ 6.0                       | 127.3 $\pm$ 6.1                       | 117.8 $\pm$ 6.8                       |

5

#### 6 **4.3 Sedimentology and biogeochemistry**

7 Krest-Yuryakh deposits on Bol'shoy Lyakhovsky Island are characterized by low ice contents (20-33 wt%) and no  
8 wedge ice at all. The magnetic susceptibility (MS) values vary between 22 and 55  $10^{-8} \text{ m}^3 \text{ kg}^{-1}$ , differing from  
9 outcrop to outcrop, while within single profiles, the differences are much smaller (Figure 5a). The TOC contents  
10 range widely from 0.6 to 15.3 wt%. High TOC values (> 5 wt%) are related to plant detritus, peat, and woody  
11 remains. The TOC/TN ratio reflecting the degree of organic matter decomposition is between 1.8 and 26.2. Low  
12 TOC/TN ratios indicate high decomposition and vice-versa (Carter and Gregorich, 2008; White, 2005). The  $\delta^{13}\text{C}$   
13 values range from -30.1 ‰ to -25.8 ‰. Differences of 3-4‰ occur within individual profiles. The carbonate  
14 contents derived from the TIC values range from 0.2 to 6.7 wt% (Figure 5a). High values are linked to the higher  
15 presence of mollusk remains. The mean arithmetic grain size ranges between 15 and 78  $\mu\text{m}$ , and the grain-size  
16 distribution curves are characterized by a three-modal shape, with peaks in the fine silt, fine sand, and medium  
17 sand fractions (Figure 5b).

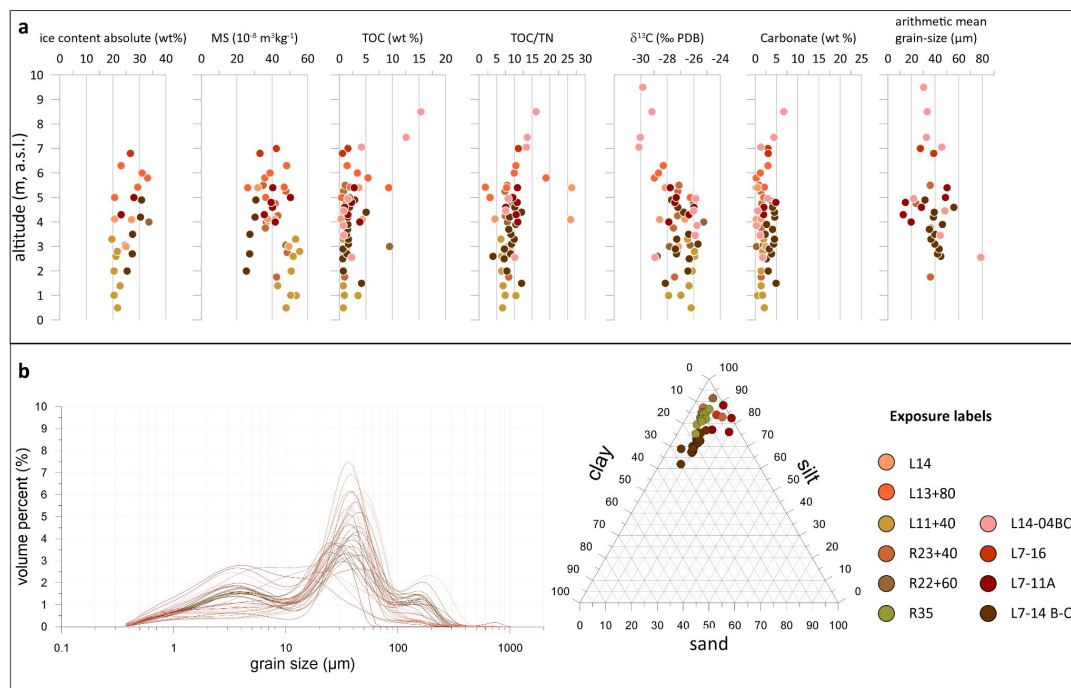

1  
2 **Figure 5. Sediment data of LIG (Krest-Yuryakh) profiles on Bol'shoi Lyakhovsky Island: (a) absolute gravimetric ice**  
3 **content, mass-specific magnetic susceptibility (MS), TOC content, TOC/TN ratio,  $\delta^{13}\text{C}$ , carbonate content, arithmetic**  
4 **grain-size mean; (b) grain-size distribution curves and sand-silt-clay percentages.**

5  
6 The cryolithological characteristics of Krest-Yuryakh deposits from the Oyogos Yar coast are similar to those of  
7 Bol'shoi Lyakhovsky Island (Figure 6a). The absolute ice contents range from 18 to 34 wt%. The MS varies  
8 between 12 and  $45 \cdot 10^{-8} \text{ m}^3 \text{ kg}^{-1}$ . Within individual profiles, the differences are rather low, but there are stronger  
9 differences in MS values between the profiles. The TOC contents range from 0.6 to 21.3 wt%. The TOC/TN ratio  
10 is between 3.5 and 18.7. The  $\delta^{13}\text{C}$  values range from  $-30.8 \text{ ‰}$  to  $-26 \text{ ‰}$ . The carbonate contents range from 1.4  
11 to 22.4 wt%. The mean arithmetic grain sizes are between 15 and 59  $\mu\text{m}$ , and the grain-size distribution curves are  
12 three-modal (Figure 6b).

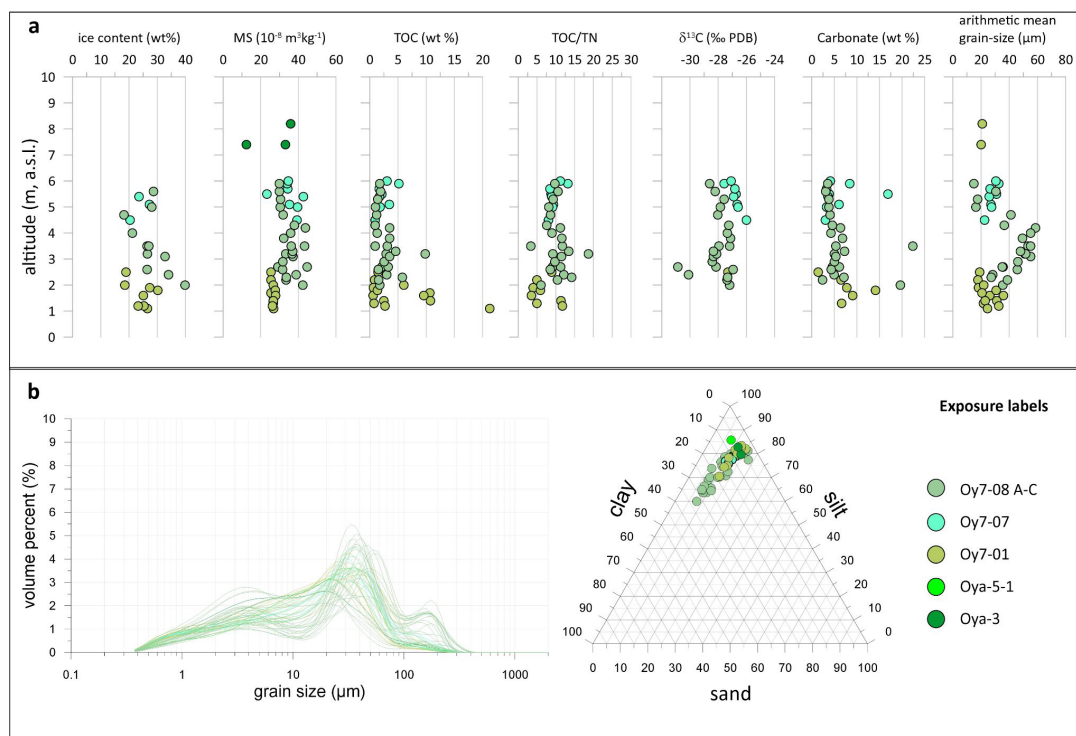

1  
2 **Figure 6. Sediment data of LIG (Krest-Yuryakh) profiles on Oyogos Yar: (a) absolute gravimetric ice content, mass-**  
3 **specific magnetic susceptibility (MS), TOC content, TOC/TN ratio,  $\delta^{13}\text{C}$ , carbonate content, arithmetic grain-size mean;**  
4 **(b) grain-size distribution curves and sand-silt-clay percentages.**

5

#### 6 4.4 Pollen-spores-based vegetation and paleoclimate reconstructions

7 The pollen assemblages of the bottom sections of ice-wedge pseudomorphs of Krest-Yuryakh deposits on Bol'shoi  
8 Lyakhovsky Island indicate that open steppe or tundra-steppe habitats with Poaceae and *Artemisia* dominated the  
9 vegetation at the beginning of the LIG (Andreev et al., 2004; Ilyashuk et al., 2006). However, relatively high  
10 abundances of *Alnus fruticosa*, *Salix*, and *Betula* sect. *nana* pollen indicate shrub presence in more protected places  
11 such as thermokarst basins and river valleys. The large amounts of coprophilous Sordariaceae fungal spores  
12 indirectly point to the presence of grazing herds of the late Pleistocene mammoth fauna (Andreev et al., 2011).  
13 The early to middle LIG pollen spectra are dominated by Poaceae, Cyperaceae, *Betula*, and *Alnus* (Andreev et al.,  
14 2004; Ilyashuk et al., 2006; Wetterich et al., 2009), reflecting a shrub-tundra vegetation. Relatively high  
15 concentrations of herb pollen taxa (*Artemisia*, Brassicaceae, Caryophyllaceae, Asteraceae) indicate that open  
16 habitats were also common. Relatively high amounts of *Glomus* fungal spores suggest that the local vegetation  
17 was frequently disturbed, probably due to active erosion processes connected with melting ice wedges and the  
18 formation of thermokarst lakes.

19 Pollen assemblages of the middle LIG from the Oyogos Yar coastal sections are dominated by Poaceae,  
20 Cyperaceae, *Larix*, *Alnus fruticosa*, and *Betula* sect. *nana* and spores of *Equisetum*, dung-inhabiting Sordariaceae,  
21 and *Glomus* (Wetterich et al., 2009; Andreev et al., 2011). Based on the relatively high percentage of *Larix* pollen,  
22 we may infer that larch forest or forest-tundra with shrub alder and dwarf birch stands dominated the vegetation



1 in the Oyogos Yar area and document that the treeline was at least 270 km north of its current position during the  
2 LIG optimum.  
3 Based on seven Krest Yuryakh profiles with 69 samples from Bol'shoy Lyakhovsky and one profile with 25  
4 samples from Oyogos Yar, the reconstructed mean MTWA was  $9.0 \pm 3.0$  °C for Bol'shoy Lyakhovsky (median  
5  $9.7 \pm 3.1$  °C) and  $9.7 \pm 2.9$  °C at Oyogos Yar (median  $9.6 \pm 2.8$  °C). The MAP was  $271 \pm 56$  mm (median  $264 \pm 52$  mm)  
6 on Bol'shoy Lyakhovsky and  $229 \pm 22$  mm (median  $230 \pm 23$  mm) at Oyogos Yar, implying that the summer climate  
7 conditions on Bol'shoy Lyakhovsky were a bit colder and moister than on Oyogos Yar.

8

#### 9 4.5 Plant macrofossil-based vegetation and paleoclimate reconstructions

10 Plant macrofossil assemblages from Krest-Yuryakh deposits at both sides of the Dmitry Laptev Strait are  
11 exceptionally well preserved and frequently allowed for identification at the species level, giving a detailed picture  
12 of local vegetation and habitat conditions at the time of deposition (Table S2). On Bol'shoy Lyakhovsky Island,  
13 assemblages are composed of remains of 100 vascular plant taxa, including aquatic macrophytes living in the  
14 thermokarst lakes (Table A1). The detected species reflect a wide range of plant communities comprising open  
15 subarctic shrub tundra with the tall shrubs *Alnus alnobetula* ssp. *fruticosa* and *Betula fruticosa*, as well as dwarf  
16 shrubs like *Betula nana* s.l., *Vaccinium vitis-idaea*, *Rhododendron tomentosum*, and *Empetrum nigrum*  
17 interspersed with patches of dry grasslands with *Carex* (formerly *Kobresia*) *myosuroides*, *Potentilla* spp.,  
18 *Artemisia* sp., *Androsace septentrionalis*, several steppe sedge species, and *Ranunculus pedatifidus* ssp. *affinis*  
19 suggesting the existence of arid habitats during MIS 5e. Arid conditions are confirmed by the halophytes  
20 (*Puccinellia*, *Tripleurospermum hookeri*, *Stellaria crassifolia*, *Rumex maritimus*) characteristic of salt marsh and  
21 saline meadow vegetation near lake shores with fluctuating water levels. The salt accumulation in the upper soil  
22 layer results from the capillary rise of solutes due to high evaporation under arid continental climates. The lakes  
23 formed habitats of aquatic macrophytes like *Callitriche hermaphroditica*, *Stuckenia vaginata*, *Myriophyllum*  
24 *spicatum*, *Batrachium* sp., *Nitella* sp., *Hippuris vulgaris*, *Sparganium hyperboreum* and *S. minimum*, species  
25 absent in the study area today. Constantly wet habitats were occupied by littoral and tundra wetland vegetation  
26 with *Eriophorum* spp., *Carex aquatilis*, *C.* sect. *Phacocystis*, *Juncus biglumis*, *Chrysosplenium alternifolium*,  
27 *Comarum palustre*, *Caltha palustris*, *Parnassia palustris*, *Ranunculus hyperboreus*, *R. lapponicus* and  
28 *Gastrolychnis violascens*. The estimated LIG MTWA on Bol'shoy Lyakhovsky Island is based on the MCR of 15  
29 selected taxa (Table 2) and ranges from 10.3 °C to 12.9 °C.

30 The plant remains at the mainland coast of Oyogos Yar reflect a LIG vegetation similar to Bol'shoy Lyakhovsky  
31 Island consisting of open shrub tundra and forest tundra interspersed with patches of steppe and meadow grassland.  
32 In contrast to modern larch-dominated forest tundra, the LIG woodland was dominated by birches, as shown by  
33 the abundance of birch remains from both trees and shrubs. In addition to tall and dwarf shrubs already recovered  
34 from Bol'shoy Lyakhovsky Island, extralimital Ericaceae taxa (*Arctostaphylos uva-ursi*, *Andromeda polifolia*,  
35 *Chamaedaphne calyculata*) and forbs (*Moehringia laterifolia*, *Stellaria longifolia*, *Chamaenerion angustifolium*)  
36 occurred at Oyogos Yar. Characteristic of the undergrowth of modern boreal forests, they likewise indicate a  
37 relatively long and warm growing season during MIS 5e.

38 Analogous to Bol'shoy Lyakhovsky Island, the reconstructed wooded tundra at Oyogos Yar was rather open as  
39 suggested by abundant remains of tundra-steppe plants like *Carex myosuroides*, *Dryas octopetala* s.l.,  
40 *Rhododendron* sp., *Potentilla stipularis*, *P. nivea*, *Ranunculus pedatifidus* ssp. *affinis* and meadow steppe species,



1 such as *Odontarrhena obovata*, *Allium* sp., *Artemisia* sp., *Carex duriuscula*, *C. supina* s.l., *Eritrichium sericeum*,  
 2 *Rumex acetosella* s.l.. These meadow steppes merged into productive alkali grass meadows indicated by abundant  
 3 remains of *Puccinellia*. *Puccinellia* sp. and other halophilic taxa, like *Chenopodium* sp. and *Spergularia salina*,  
 4 have an affinity to brackish conditions, which suggests high evaporation and low lake levels in response to seasonal  
 5 aridity at Oyogos Yar during the LIG, similar to Bol'shoy Lyakhovsky Island.  
 6 The inventory of water plants at Oyogos Yar resembles that of the Bol'shoy Lyakhovsky assemblage and was  
 7 supplemented by abundant extralimital, i.e., thermophilous, aquatic macrophytes like *Stuckenia filiformis* and  
 8 *Potamogeton perfoliatus*. The estimated LIG MTWA at Oyogos Yar is based on the MCR of 17 selected taxa  
 9 (Table 2) and ranges from 12.7 °C to 15.3 °C.

10 **Table 2: MTWA requirements and updated coexistence interval of selected vascular plant species that were identified**  
 11 **in LIG (Krest-Yuryakh) deposits on Bol'shoy Lyakhovsky Island and the Oyogos Yar mainland coast. Determining**  
 12 **values of the coexistence intervals are highlighted in bold.**

| Taxon                                              | MTWAMin<br>[°C] | MTWAMax<br>[°C] | Bol'shoy<br>Lyakhovsky<br>Island | Oyogos Yar          |
|----------------------------------------------------|-----------------|-----------------|----------------------------------|---------------------|
| <i>Alnus hirsuta</i>                               | <b>12.7</b>     | 18.4            |                                  | X                   |
| <i>Alnus alnobetula</i> subsp. <i>fruticosa</i>    | 7.5             | 18.4            | X                                | X                   |
| <i>Betula nana</i> s.l.                            | 5.2             | 18.0            | X                                | X                   |
| <i>Betula fruticosa</i>                            | 9.1             | 18.4            | X                                | X                   |
| <i>Potamogeton perfoliatus</i>                     | 10.3            | 18.4            |                                  | X                   |
| <i>Myriophyllum spicatum</i> / <i>M. sibiricum</i> | <b>10.3</b>     | 18.4            | X                                | X                   |
| <i>Larix gmelinii</i>                              | 8.0             | 18.4            |                                  | X                   |
| <i>Betula divaricata</i>                           | 7.6             | 18.4            |                                  | X                   |
| <i>Arctostaphylos uva-ursi</i>                     | 10.6            | 18.4            |                                  | X                   |
| <i>Moehringia lateriflora</i>                      | 9.9             | 18.4            | X                                | X                   |
| <i>Callitriche hermaphroditica</i>                 | 8.1             | 18.4            | X                                | X                   |
| <i>Menyanthes trifoliata</i>                       | 5.2             | 18.1            | X                                |                     |
| <i>Sparganium hyperboreum</i>                      | 8.1             | 18.1            | X                                | X                   |
| <i>Sparganium minimum</i>                          | 10.3            | 18              | X                                | X                   |
| <i>Cherleria arctica</i>                           | 3.3             | 13.3            | X                                |                     |
| <i>Coptidium lapponicum</i>                        | 3.5             | 16.9            | X                                | X                   |
| <i>Silene involucrata</i>                          | 3.3             | 15.7            | X                                | X                   |
| <i>Ranunculus pedatifidus</i> ssp. <i>affinis</i>  | 5.6             | 17.6            | X                                | X                   |
| <i>Sagina nivalis</i>                              | 2.6             | <b>12.9</b>     | X                                |                     |
| <i>Potentilla hyparctica</i>                       | 2.6             | 14.6            | X                                |                     |
| <i>Ranunculus nivalis</i>                          | 1.6             | <b>15.3</b>     |                                  | X                   |
| <b>Coexistence interval MTWA [°C]</b>              |                 |                 | <b>10.3 to 12.9</b>              | <b>12.7 to 15.3</b> |

13

#### 14 4.6 *Seda*DNA-based vegetation reconstruction

15 The Krest-Yuryakh deposits on Bol'shoy Lyakhovsky Island exhibit rich vegetation with *sed*aDNA derived from  
 16 several woody taxa, including trees, shrubs, and sub-shrubs, suggesting interglacial, warmer-than-present  
 17 conditions (Figure 7). The proportions of sequences assigned to woody taxa (trees < 1% and shrubs 6-87%), forbs  
 18 (8-91%), and grasses (2-39%) were highest, while the proportions of sedges (< 1%), cryptogams (< 1%), and



1 aquatic forbs (up to 1.6%) were very low. Among woody taxa, we detected *Larix*, *Picea*, *Populus*, *Alnus*, *Betula*,  
2 *Ribes*, *Saliceae*, and *Cornus*, as well as sub-shrubs such as arctic-alpine *Dryas* and Ericaceae, including *Arctous*,  
3 *Pyrola* spp., *Vaccinium uliginosum*, and *Vaccinium vitis-idaea* (Zimmermann et al., 2017) which are typical  
4 components of the understory in boreal forests but also of subarctic tundra habitats. The forbs contain mainly taxa  
5 adapted to dry steppe conditions (*Artemisia gmelinii*, including halophilic *Puccinellia*), arctic-alpine tundra  
6 (*Braya*, *Draba*, and *Dryas*), or pioneer plants (*Papaver* and *Oxyria digyna*). Other forbs such as *Geum*, *Myosotis*  
7 *alpestris*, and *Bistorta* are typical components of forest margins or meadows. The Krest-Yuryakh deposits formed  
8 in a shallow lake in which aquatic and riparian forbs included *Menyanthes trifoliata*, *Stuckenia*, *Potamogeton*,  
9 *Hippuris*, and *Caltha palustris*. Nevertheless, sedges in the lower part of the core L14-04 were composed of two  
10 distinct *Kobresia* variants (same barcode shared between *K. filifolia* and *K. simpliciuscula* and between *K. sibirica*  
11 and *K. myosuroides* (now *Carex myosuroides*) typical of dry to wet habitats while the upper section of the profile  
12 also contained the sedges *Carex* and *Eriophorum* that are typical for wet habitats but also steppe. This shift between  
13 8 and 12 m a.s.l. is accompanied by high proportions (up to 33%) of cryptogams and graminoids (*Eriophorum*,  
14 Bryophytes), while woody taxa were only represented by *Salix*, overall suggesting a transition to cooler and more  
15 moist conditions.

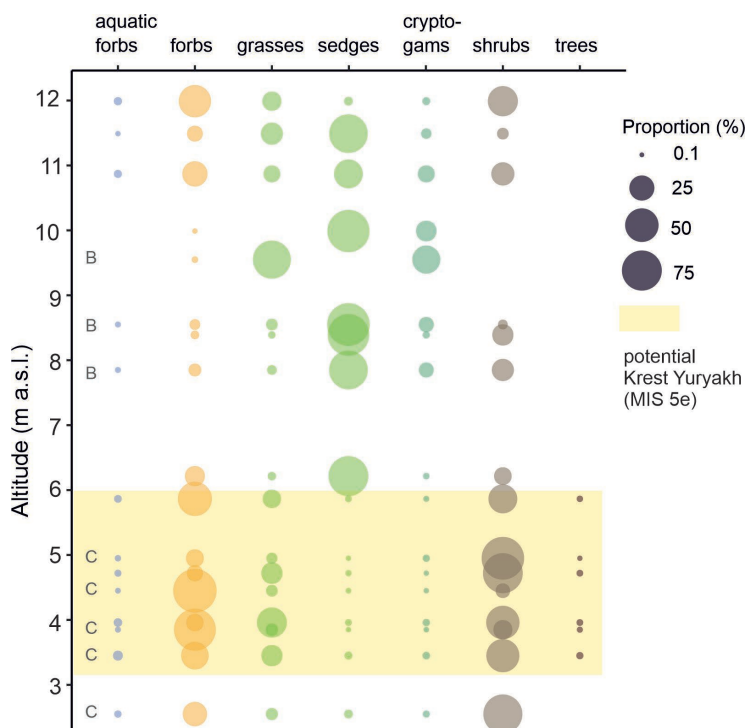

16  
17 **Figure 7. Composition of plant functional groups in the *sedaDNA* metabarcoding record of combined LIG (Krest-**  
18 **Yuryakh) samples from core L14-04 and profiles L14-04-B (indicated by B) and L14-04-C (indicated by C) from**  
19 **Bol'shoy Lyakhovsky Island. Figure 7 was generated using ggplot2 v. 3.4.2 (Wickham, 2016) in R v. 4.1.3 (R Core Team,**  
20 **2022).**

21

#### 22 4.7 Biomarker-based paleoclimate reconstruction



1 Samples from core L14-04 analyzed for GDGTs (Table S3) include those from the MIS 5e (Krest-Yuryakh stratum  
2 (n = 3) as well as deposits from younger MIS 5d-a horizons (n = 6) and MIS 1 (active layer; n = 1). BrGDGT  
3 distributions globally have a near-universal relationship with temperature irrespective of sample type (Raberg et  
4 al., 2022), yet their producers are ubiquitous in nature. Since the Krest-Yuryakh stratum is composed of both  
5 lacustrine deposits and peaty plant detritus layers, we tested the potential influence of in-situ production by benthic  
6 bacteria in sediments using #rings<sub>tetra</sub> (Sinninghe Damsté, 2016). The #rings<sub>tetra</sub> values throughout core L14-04  
7 range from 0.04 to 0.25, with values from 0.12 to 0.15 in the LIG deposits. These values indicate that brGDGTs  
8 are not produced by benthic bacteria (#rings<sub>tetra</sub> >0.7), but instead mostly derive from soil/peat and, thus, record  
9 Air Growing Season Temperature (GST). Reconstructed Air GST is 0.9 °C for the active layer, 2.8±0.3 °C for the  
10 MIS 5e deposits and 1.3±0.9 °C for the MIS 5d-a deposits (Figure 8).

11 Although brGDGT distributional changes have been observed as a direct physiological response to temperature  
12 (as well as pH and O<sub>2</sub> concentrations) in acidobacterial cultures (Halamka et al., 2021, 2023), various confounding  
13 factors such as soil chemical properties (pH, cation availability) and bacterial community composition (e.g.,  
14 Halfman et al., 2021; de Jonge et al., 2024) can also affect brGDGT distributions. For example, the BIT and Ri/b  
15 indices in soils show a relationship with mean annual precipitation/soil moisture. At lower soil moisture, BIT index  
16 decreases and the Ri/b increases (Xie et al., 2012; de Jonge et al., 2024). For core L14-04, Ri/b values are  
17 substantially higher in the Krest-Yuryakh stratum (Figure 8), suggesting more arid conditions during MIS 5e  
18 compared to MIS 5d-a and MIS1. The (isoGDGT-1 + isoGDGT-3)/(isoGDGT-1 + crenarchaeol) values, which  
19 seem to correlate with mean monthly precipitation (de Jonge et al., 2024) also follow this overall trend. Absolute  
20 crenarchaeol concentrations do not correlate with Air GST (Pearson correlation coefficient r = 0.058, p = 0.87),  
21 suggesting the observed trends are indeed controlled by soil moisture/precipitation rather than temperature. Yet,  
22 no calibration exists that would allow us to calculate mean annual precipitation, thus we only use this information  
23 qualitatively.

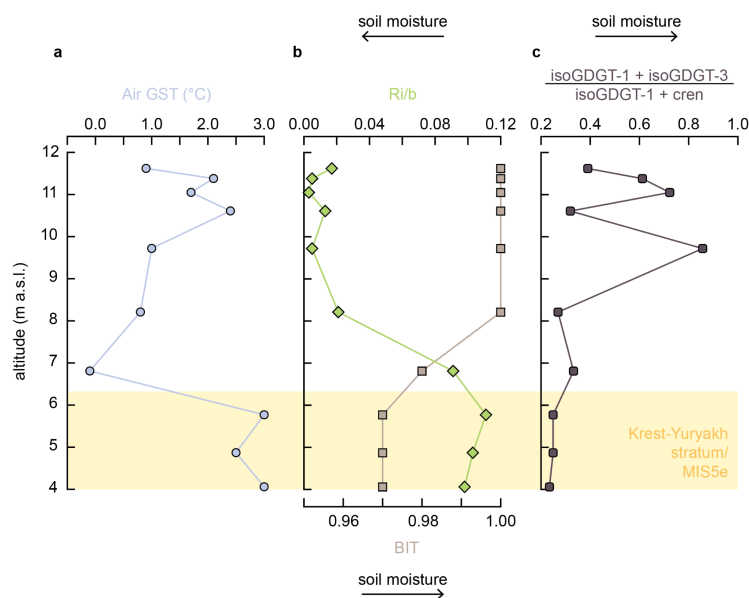

24

25 **Figure 8. BrGDGT-based proxies in core L14-04: (a) MBT<sup>SME</sup>-based Air Growing Season Temperature (Air GST)**  
26 **following de Jonge et al. (2024); (b) branched and isoprenoid tetraether index (BIT) and ratio of isoGDGTs to brGDGTs**  
27 **(Ri/b); (c) ratio (isoGDGT-1 + isoGDGT-3)/(isoGDGT-1 + crenarchaeol).**





1

2 **4.8 Beetle-based faunal habitat and paleoclimate reconstructions**

3 The fossil insect assemblages of the LIG on Bol'shoy Lyakhovsky Island and on Oyogos Yar are rich in species,  
 4 and the concentration of remains is very high in comparison to other stratigraphic units in the study area (Kuzmina,  
 5 2015a, 2015b, Table S4). Insect remains are well preserved. The fossil insect fauna shows a high amount of steppe  
 6 species (Table S5). The share of *Morychus viridis* reaches up to 15%. Several identified thermophilous steppe  
 7 species (*Cymindis arctica*, *Chrysolina brunnicornis bermani*, *Stephanocleonus eruditus*, *S. fossulatus*) are absent  
 8 in other Pleistocene samples. Arctic species (*Chrysolina subsulcata*, *Ch. bungei*) present only 3%. The weevil  
 9 *Dorytomus imbecillus* indicates shrub vegetation. Several species prefer habitats in and on plant litter  
 10 (*Cyrtodactylus irregularis*, *Eucnecosum tenue*, *Lathrobium* sp., *Philonthus* sp., *Quedius* sp.). A number of riparian  
 11 and aquatic insects (*Colymbetes dolabratus*, *Aegialia kamtschatica*, *Agonum impressum*, *Sericoda quadripunctata*,  
 12 *Scymnus* sp., *Notaris bimaculatus*) identified in the Interglacial samples are not recorded on the island today. The  
 13 predaceous diving beetle *Colymbetes dolabratus* lives in the north of boreal forest and tundra zones up to Baffin  
 14 Island and Greenland. In Eurasia, the species is common in the north but is not found in the high Arctic. Other  
 15 species are nowadays distributed mostly in the forest zone, but their life cycle is not connected directly to the trees.  
 16 The ground beetle *Sericoda quadripunctata* is known as post forest-fire species but can also occur in any open  
 17 disturbed habitats. A brief comparison of representative insects from older and younger stratigraphic horizons are  
 18 summarized in a separate text as Text S1 and a possible periglacial landscape is presented in Figure S2.

19 To evaluate the LIG climate conditions in the Dmitry Laptev Strait region, two sources of thermal requirements  
 20 are used, which are a West Beringian list (including phytophagous species; Alfimov et al., 2003) and a  
 21 Transberingian list (excluding phytophagous species; Elias, 2000), both based on museum collections. In these  
 22 datasets, several species have slightly different temperature ranges in East and West Beringia (Table S6). The  
 23 overlap in coexistence intervals for West Beringian species is shown in Figure S1. Combined results are presented  
 24 in Table 3. Including phytophagous beetles provides important environmental information. The weevils  
 25 *Stephanocleonus eruditus* and *S. fossulatus* need high soil temperature (>12 °C) for the larvae to grow. Larvae of  
 26 these weevils are root eaters and live in the soil horizon. They are active in warm seasons only. Winter temperature  
 27 is not critical (Berman et al., 2011). The coexistence of thermophilous weevils and cold-adapted leaf beetles  
 28 (MTWA range of *Chrysolina subsulcata* is 2 to 10 °C; Table S6) in one fossil assemblage highlights where the  
 29 coexistence intervals do not overlap (Alfimov et al., 2003) as also observed in samples R-22-B15 and L-11-B19  
 30 (Table 3).

31 The thermal coexistence intervals of all considered beetle species, i.e., their MCR is 8 to 10.5 °C for MTWA and  
 32 –34 to –26 °C for MTCO on Bol'shoy Lyakhovsky, and 8 to 14 °C for MTWA and –38 to –26 °C for MTCO on  
 33 Oyogos Yar.

34

35 **Table 3: MTWA and MTCO requirements and coexistence intervals of beetles from LIG (Krest-Yuryakh) samples**  
 36 **based on modern reference data in Alfimov et al. (2003) and Elias (2000) applying the MCR method. Determining values**  
 37 **of the coexistence intervals are highlighted in bold.**

| Sample ID                         | MTWAMin [C°] | MTWAMax [C°] | MTCOMin [C°] | MTCOMax [C°] |
|-----------------------------------|--------------|--------------|--------------|--------------|
| <b>Bol'shoy Lyakhovsky Island</b> |              |              |              |              |
| L-11-B17                          | <b>8</b>     | 13           | –37          | <b>–26</b>   |
| L-11-B19                          | 4            | <b>10.5</b>  | –38          | –24          |



|                   |   |    |     |     |
|-------------------|---|----|-----|-----|
| R-22-B15          | 4 | 18 | -34 | -26 |
| R-22-B16          | 8 | 14 | -35 | -26 |
| <b>Oyogos Yar</b> |   |    |     |     |
| Oya 5-1           | 8 | 14 | -38 | -26 |

1

#### 2 4.9 Chironomid-based habitat and paleoclimate reconstructions

3 In profile R35 (Bol'shoy Lyakhovsky Island), 33 chironomid taxa were identified. The assemblage from the  
 4 lowermost sample (1.2 m a.s.l.) includes a relatively high share of semi-terrestrial taxa *Metriocnemus-*  
 5 *Thienemannia*, *Smittia*, and *Limnophyes-Paralimnophyes* indicative of low and variable water level. Between 1.4  
 6 and 2.2 m a.s.l., we find a high relative abundance of the taxa typical of warm and more eutrophic conditions  
 7 (*Chironomus plumosus*-type, *Cricotopus-Orthocladius*, *Procladius*). Here, taxa characteristic for shallow water,  
 8 semi-terrestrial conditions, or temporary waters (*Limnophyes-Paralimnophyes*, *Geothocladius*, *Hydrobaenus*)  
 9 and taxa that can tolerate acidic conditions (*Tanytarsus*, *Psectrocladius sordidellus*-type) are less abundant.  
 10 Between 2.2 and 5.2 m a.s.l., a high share of eutrophic taxa (*Chironomus plumosus*-type, *C. anthracinus*-type,  
 11 *Procladius*) and those indicative of cooler and more acidic conditions (*Sergentia coracina*-type) are present.  
 12 The chironomid-inferred MTWA of R35 varies between 3.4 °C (at 1.2 m a.s.l.) and 15.3 °C (at 4.4 m a.s.l.) (Table  
 13 4). The median MTWA is 12.7 °C for the middle section (1.6–3.2 m a.s.l.) and 13.9 °C for the upper section (3.6–  
 14 5.2 m a.s.l.). The highest error of prediction (SE of ± 4.8 °C) occurs in the lowermost sample (at 1.2 m a.s.l.). That  
 15 can be explained by the dominance of semi-terrestrial taxa, especially *Metriocnemus*, which is also often found in  
 16 lake sediments but has still debated ecological requirements (Moller Pillot, 2009 and reference therein). In the NR  
 17 dataset, *Metriocnemus* appears with a broad range of ecological conditions with a high-temperature tolerance of  
 18 9.3±4.6 °C (Nazarova et al., 2015), which leads to a high error in the temperature reconstruction. Therefore, these  
 19 data from the lowermost sample of profile R35 (at 1.2 m a.s.l.) are not considered in further paleoclimatic  
 20 interpretation. For all other samples, the errors of prediction remain at the average level of the transfer function  
 21 (1.4–1.5 °C; Nazarova et al., 2015). The inferred WD reflects a period of shallow water (WD of 1.7–2.4 m) during  
 22 deposition of the strata between 1.2 and 2 m a.s.l., rising water level (WD 4.5–5.6 m) between 2.4 and 3.2 m a.s.l.,  
 23 and decreasing water level (mean WD of 3.8±0.5 m) between 3.6 and 5.2 m a.s.l. (Table 4).

24

25 **Table 4: Mean air temperature of the warmest month of the year (MTWA) and water depth (WD) and the errors of**  
 26 **prediction (SE) reconstructed from the chironomid communities of LIG (Krest-Yuryakh) deposits of Bol'shoy**  
 27 **Lyakhovsky Island (profile R35; Ilyashuk et al., 2006) and Oyogos Yar (profile Oya 5-1; Kienast et al., 2011). Data in**  
 28 **brackets are not considered for paleoclimatic interpretation.**

| Sampling height<br>[m a.s.l.]                  | MTWA ± SE<br>[°C] | WD ± SE<br>[m] |
|------------------------------------------------|-------------------|----------------|
| <b>Bol'shoy Lyakhovsky Island, profile R35</b> |                   |                |
| 5.2                                            | 13.7 ± 1.4        | 3.3 ± 1.0      |
| 4.8                                            | 13.2 ± 1.5        | 3.8 ± 1.0      |
| 4.4                                            | <b>15.3 ± 1.5</b> | 4.1 ± 1.1      |
| 4.0                                            | 13.9 ± 1.5        | 3.9 ± 1.1      |



|                                  |                   |                  |
|----------------------------------|-------------------|------------------|
| 3.6                              | 13.9 ± 1.4        | 2.7 ± 0.9        |
| 3.2                              | 12.7 ± 1.4        | <b>5.6 ± 1.0</b> |
| 2.8                              | 13.7 ± 1.5        | 4.5 ± 1.0        |
| 2.4                              | <b>9.4 ± 1.7</b>  | 5.4 ± 1.0        |
| 2.0                              | 15.1 ± 1.5        | <b>1.7 ± 0.9</b> |
| 1.6                              | 10.3 ± 2.0        | 2.4 ± 1.0        |
| (1.2)                            | (3.4 ± 4.8)       | (2.4 ± 1.2)      |
| <b>Oyogos Yar, sample Oya5-1</b> |                   |                  |
| 3.5                              | <b>12.9 ± 0.9</b> | <b>2.2 ± 1.1</b> |

1  
 2 The chironomid assemblage in sample Oya 5-1 is diverse and includes 16 taxa. The semi-terrestrial *Limnophyes*,  
 3 *Smittia*, and the acidophilic *Psectrocladius sordidellus*-type dominate it. Phytophilic taxa indicative for temperate  
 4 shallow lakes or littoral conditions are less abundant (*Cricotopus laricomalis*-type, *Tanytarsus pallidicornis*-type,  
 5 *Endochoronomus albipennis*-type). The inferred MTWA from the chironomid community of the Oyogos Yar  
 6 sample (Oya 5-1) is 12.9±0.9 °C and WD 2.2±1.1 m (Table 4).

7

#### 8 **4.10 Cladocera-based habitat reconstruction**

9 The fossil cladocera remains of LIG deposits on Bol'shoy Lyakhovsky Island and Oyogos Yar are exceptionally  
 10 well preserved. The overall cladocera record comprises 13 taxa, of which six were identified at the species level,  
 11 four to groups or taxa, and three at the genus level (Table S7). The most common species that occur in at least four  
 12 of the five profiles are *Chydorus* cf. *sphaericus*, *Bosmina* sp., and *Daphnia pulex* gr. The cladocera communities  
 13 are dominated by littoral shallow-water taxa, such as *Ch.* cf. *sphaericus* and *Alona guttata/Coronatella rectangula*  
 14 representing 79 % of the total number of individuals, while the proportion of planktic taxa (*Bosmina* sp., *D. pulex*  
 15 gr.) amounts to 21 %.

16 Profile L7-11 on Bol'shoy Lyakhovsky shows very low concentrations of 1-2 specimens per gram of dry sediment.  
 17 In total, only 11 individuals of *Ch.* cf. *sphaericus*, *Bosmina* sp., and *D. pulex* gr. are found (Table S7). Of those,  
 18 *Ch.* cf. *sphaericus* is the most common species that is a widely distributed, eurytopic, phytophilous pioneer species  
 19 inhabiting the littoral (Bledzki and Rybak, 2016). This taxon is highly adaptive, resistant to adverse environmental  
 20 conditions and low temperatures, and often migrates further north than other cladocera species (e.g. Frolova et al.,  
 21 2014; Luoto et al., 2011).

22 The cladoceran records on Oyogos Yar are more diverse and had much higher concentrations than those on  
 23 Bol'shoy Lyakhovsky. Exemplarily, the Oya 5-1 record (Kienast et al., 2011) revealed the most numerous record  
 24 comprising >150 specimens per sample, representing a total of nine species, most of which belong to the family  
 25 Chydoridae (seven species). The assemblage is dominated by *Ch.* cf. *sphaericus* (37%), *A. guttata/C. rectangula*  
 26 (29%), and *Bosmina* sp. (29 %). Littoral species that inhabit macrophytes or detritus-rich silty lake margins, mainly  
 27 *Ch.* cf. *sphaericus* and *A. guttata/C. rectangula*, represent two-thirds of the assemblage, while one-third is  
 28 planktonic (mainly *Bosmina* sp. and *D. pulex* gr.) (Kienast et al., 2011).



1 Cladocera remains are also well represented in profile Oy7-08, where the high species richness (9 taxa in sample  
2 Oy7-08-19) and the highest concentration of remains in sediments (39 specimens per gram of dry sediment in  
3 Oy7-08-19) are noted (Table S7). Most remains belong to littoral phytophilous species associated with  
4 macrophytes (*Ch. cf. sphaericus*, *Acroperus harpae*, *Alonella excisa*, *Eurycercus* sp., *Sida crystallina*). Besides  
5 typical northern or Arctic species such as *A. harpae*, *Ch. cf. sphaericus*, and *Alona affinis* taxa indicative of higher  
6 water temperatures are observed, such as *Leydigia leidigi* and *S. crystallina* that were not found in modern bottom  
7 sediments of >30 water bodies on the coast of the Laptev Sea (L. Frolova, unpublished data). The cladoceran  
8 assemblages of Oyogos Yar indicate habitats with a well-developed vegetated shallow littoral zone and pelagic  
9 open-water zones.

10

#### 11 4.11 Mollusk-based habitat reconstruction

12 LIG deposits on Bol'shoi Lyakhovskiy Island contain *Sphaerium corneum* with ten complete valves and fragments,  
13 *Valvata piscinalis* with ten complete shells and fragments, *Lymnaea cf. peregra* with one shell, and *Pisidium* sp.  
14 with six valves (E.E. Taldenkova, T.A. Yanina, unpublished data).

15 At Oyogos Yar, mollusks were identified by A. Kossler. There, two freshwater gastropod taxa of the genera *Radix*  
16 and *Gyraulus* are represented only by a few juvenile shell fragments impeding species identification and deduction  
17 of precise environmental implications (Kienast et al., 2011). The distribution of *Radix* further to the north than  
18 today can be interpreted as an indication of warmer than present climate conditions. Additional identified shell  
19 fragments include *Valvata cf. piscinalis* and *Lymnaea cf. stagnalis* (E.E. Taldenkova, T.A. Yanina, unpublished  
20 data). Furthermore, five bivalve species have been identified (Kienast et al., 2011): *Pisidium casertanum*, *P.*  
21 *subtruncatum*, *P. cf. lilljeborgii*, *P. obtusale f. lapponicum*, and *P. stewarti* of which the most frequent (*P.*  
22 *casertanum* and *P. subtruncatum*) are eurytopic and widely distributed, while the rare *P. obtusale f. lapponicum*  
23 inhabits typically arctic and subarctic regions. The stenoeicous species *P. lilljeborgii* indicates oxygen-rich,  
24 oligotrophic, and stagnant water bodies. *P. stewarti* is only known from the Tibetan Plateau and the Siberian Irtysh  
25 region (Kuiper, 1962, 1968). Additionally, the species *Sphaerium cf. corneum* has been found (E.E. Taldenkova,  
26 T.A. Yanina, unpublished data).

27

#### 28 4.12 Ostracod-based habitat reconstruction

29 The LIG ostracod record obtained at both shores of the Dmitry Laptev Strait comprises 23 taxa, of which 20 were  
30 identified at the species level, two at the genus level, and one taxon comprises juvenile Candoninae (Table S8).  
31 The most common species which have occurrences in at least four of the five studied profiles are *Candona candida*,  
32 *Fabaeformiscandona harmsworthi*, *F. levanderi*, *F. rawsoni*, *F. tricatricosa*, *Eucypris dulcifons*, *Ilyocypris*  
33 *lacustris*, *Cytherissa lacustris*, and *Limnocytherina sanctipatricii*. Exemplarily, the Oya 5-1 record (Kienast et al.,  
34 2011) that revealed the most numerous record comprising >1000 specimens per sample belonging to a total of 11  
35 species is dominated by *C. candida* (34 %), *Cy. lacustris* (26 %), and *F. rawsoni* (15 %).

36 The species *Cy. lacustris*, *F. tricatricosa*, and *L. sanctipatricii* are adapted to cool water temperatures (Meisch,  
37 2000), and *T. cf. glacialis*, *F. rawsoni*, and *F. harmsworthi* are cold-stenothermic (Wetterich et al., 2008a, 2008b).  
38 Increased salinity in the water is tolerated by *L. sanctipatricii* (0.5-5 ‰), *C. lacustris* (up to 1.5 ‰) and *F. levanderi*  
39 (up to 6 ‰; Meisch, 2000).



#### 1 4.13 Clumped isotope temperature and thermokarst lake $\delta^{18}\text{O}$ reconstructions from ostracod and 2 bivalve calcite

3 Clumped isotope  $\Delta_{47}$  values range between 0.641 and 0.658 ‰, with standard errors between 0.005 and 0.011 ‰  
4 (95% confidence intervals between 0.01 and 0.022 ‰). Of the 54 sample replicates, three erroneous replicates  
5 (with stable or clumped isotope values greater than  $\bar{x} \pm 2\sigma$ ), and one contaminated replicate ( $\Delta_{48} > 1$  ‰) were  
6 removed from the final  $\Delta_{47}$  calculations. The final values suggest carbonate precipitation temperatures ( $T_{\Delta_{47}}$ )  
7 between 5.3 and 10.3°C. The raw data is presented in Table S9 and results are summarized in Table 5.

8 Fossil carbonate  $\delta^{18}\text{O}$  values range from  $-14.65 \pm 0.02$  ‰ to  $-14.12 \pm 0.02$  ‰ VPDB, resulting in reconstructed  
9 water  $\delta^{18}\text{O}$  estimates ( $\delta^{18}\text{O}_w$ ) between  $-18.9 \pm 0.3$  ‰ and  $-17.8 \pm 0.6$  ‰ VSMOW.

10

11 **Table 5: Clumped isotope results from fossil biogenic carbonates from profile Oya 5-1. N = number of replicate  
12 measurements used to calculate  $\Delta_{47}$  with the number of rejected samples in parenthesis.  $\Delta_{47}$  and  $\delta^{18}\text{O}$  of carbonate  
13 ( $\delta^{18}\text{O}_{cc}$ ) uncertainties are given as external standard errors over multiple replicates.  $\delta^{18}\text{O}_w$  is the estimated  $\delta^{18}\text{O}$  of water  
14 from which the carbonate formed, with uncertainty estimated through the propagation of temperature and isotope  
15 uncertainties.**

| Sample                      | N      | $\Delta_{47}$<br>[‰ ICDES] | $T_{\Delta_{47}}$ [°C] | $\delta^{18}\text{O}_{cc}$ measured<br>[‰ VPDB] | $\delta^{18}\text{O}_w$<br>[‰ VSMOW] |
|-----------------------------|--------|----------------------------|------------------------|-------------------------------------------------|--------------------------------------|
| <i>Candona candida</i>      | 18 (1) | $0.641 \pm 0.011$          | $10.2 \pm 3.2$         | $-14.12 \pm 0.02$                               | $-18.6 \pm 0.7$                      |
| <i>Cytherissa lacustris</i> | 21 (1) | $0.641 \pm 0.010$          | $10.3 \pm 3.0$         | $-14.31 \pm 0.02$                               | $-17.8 \pm 0.6$                      |
| <i>Pisidium casertanum</i>  | 15 (2) | $0.658 \pm 0.005$          | $5.3 \pm 1.5$          | $-14.65 \pm 0.02$                               | $-18.9 \pm 0.3$                      |

16

#### 17 4.14 Paleoclimate modeling

18 ~~Using the PaleoMIP lig127k model simulations (Otto-Bliesner et al., 2021; Kageyama et al., 2021, Table S10)~~  
19 ~~together with the NOAA GlobTempV6 ERA5 data, we derived maps of climatological means of MTWA, MTCO,~~  
20 ~~and MAP for the Bol'shoi Lyakhovsky and Oyogos-Yar region according to the methodology described above.~~

21 These maps cover the Laptev Sea to the west and north, the Eastern Siberian Sea to the east, and a small part of  
22 continental Siberia to the south and provide regional patterns of these climate variables in addition to values for  
23 the sample sites (Figure 9). Climate change signals for both warmest and coldest months as well as their ensemble  
24 spreads are in agreement with the seasonal signals shown in Otto-Bliesner et al. (2021), where warmer winters  
25 occur over the Arctic Ocean, albeit with a high inter-model spread, and warmer summers are evident dominantly  
26 over the continents and less pronounced over the Arctic ocean, associated with low inter-model spread. Note that  
27 due to the lack of a reference data set for pre-industrial precipitation, MAP values are PaleoMIP lig127k ensemble  
28 means.

29 The MTCO for the LIG derived from modeled anomalies are between  $-40$  and  $-26$  °C, with a distinct north-south  
30 gradient and colder temperatures over grid cells that include land (Figure 9). The modern MTCO is higher than  
31 modeled temperatures for the LIG with larger differences over the sea than over land. The model agreement is  
32 highest over grid cells on the continent distal to the coastline, lower over the ocean, and lowest along the coastline,  
33 which indicates that a significant fraction of the uncertainty is related to the different land-sea masks in the different  
34 models. This is reflected in the values calculated for the sample sites and the generic LandPoint (see Table 6), with  
35 the highest MTCO for Bol'shoi Lyakhovsky and lowest MTCO for the generic LandPoint in both the PMIP multi-  
36 model ensemble mean and ERA5, and a higher uncertainty for the sample points than for the generic land point.



1 LIG MTWA estimates from the PMIP multi-model ensemble mean range from 0°C over the sea to 18°C over the  
 2 south-western land area. Model temperatures are consistently higher than present-day temperatures from the ERA5  
 3 reanalysis. At the same time, the general spatial patterns are very similar (lowest temperatures over the northeastern  
 4 sea corner of the plotted area, highest temperatures over the southwestern land area). The agreement between the  
 5 PaleoMIP models is higher than for the MTCO, with good agreement in all areas except the coastlines, again  
 6 indicating that higher uncertainties are related to the different land-sea masks in the different models. MTWA  
 7 values of the sample points and the generic land point reflect the north-south gradient shown in the map (Figure  
 8 9), with the lowest MTWA values for Bol'shoi Lyakhovsky and the highest MTWA for the LandPoint. Both the  
 9 LandPoint and Bol'shoi Lyakhovsky are located in grid cells that are considered land by most models, leading to  
 10 an uncertainty only half as high as for Oyogos Yar, which is situated in a grid cell with varying land content.  
 11 MAP from the PMIP multi-model ensemble mean is between 250 and 450 mm, showing lower values over the sea  
 12 and higher values over the continental land area. This general pattern is similar to that of the present-day reanalysis  
 13 results, where precipitation is lower than those modeled for the LIG. The PMIP models show the highest agreement  
 14 over the sea and the lowest agreement over the continental grid cells.  
 15

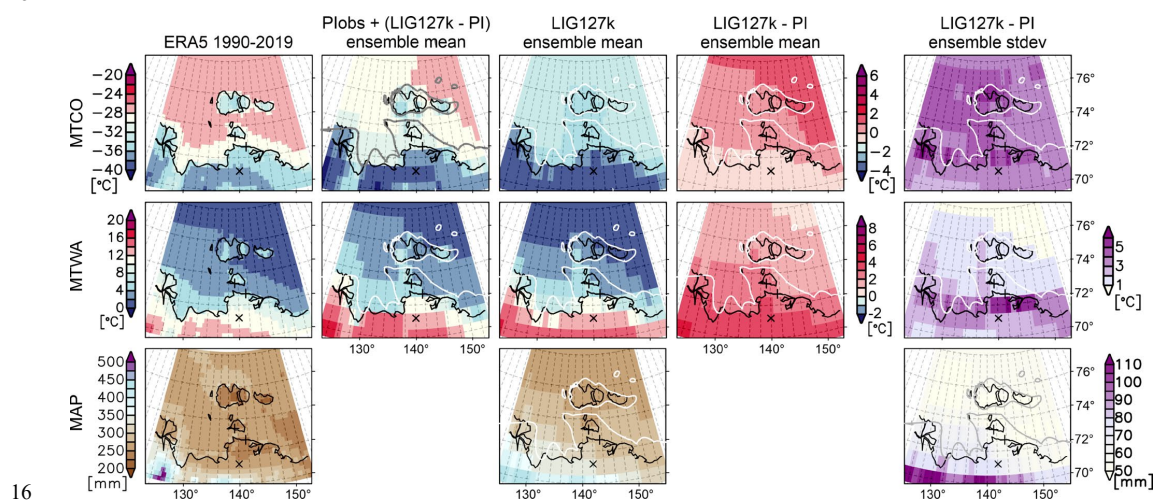

16  
 17 **Figure 9.** Climatological means of monthly mean temperature of the coldest (MTCO, top row) and the warmest month  
 18 (MTWA, middle row) and of mean annual precipitation (MAP, bottom row) from the ERA5 reanalysis (left column),  
 19 PaleoMIP multi-model anomaly added to observed PI values (Plobs+(lig127k-PI) for temperatures and PaleoMIP  
 20 multi-model ensemble mean (lig127k ensemble mean) for precipitation, PaleoMIP ensemble mean anomaly with respect  
 21 to modeled PI (lig127k-PI ensemble mean) and PMIP multi-model anomaly standard deviation (ensemble stdev).  
 22 The plus signs denote the position of the sample sites, and the x signs denote the position of the generic LandPoint. Black  
 23 lines mark today's coastlines, the white resp. gray lines mark the coastlines of the lig127 (after Alekseev et al., 1991b)

24  
 25



1

2 **Table 6: Evaluation of MTWA and MTCO from the Plobs+(lig127k-PI) multi-model ensemble mean and MAP from**  
3 **the PaleMIP lig127k multi-model ensemble mean. Values in brackets refer to the present-day reference from ERA5**  
4 **(1990-2019).**

| Site                       | MTWA [C°]       | MTCO [C°]         | MAP [mm]     |
|----------------------------|-----------------|-------------------|--------------|
| Bol'shoy Lyakhovsky Island | 4.4±1.0 (2.7)   | -31.1±1.4 (-32.7) | 278±50 (262) |
| Oyogos Yar                 | 4.5±1.2 (7.5)   | -31.6±1.4 (-34.1) | 285±55 (243) |
| LandPoint                  | 13.6±0.9 (11.0) | -38.7±1.0 (-36.3) | 328±70 (259) |

5 **5 Discussion**

6 **5.1 Cryolithology of LIG thermokarst deposits**

7 The cryolithological parameters of the LIG deposits are shown in Figure 10, each in comparison to the  
8 stratigraphically younger Yedoma Ice Complex (mostly MIS 3) and Holocene (MIS 1) thermokarst deposits  
9 according to Schirrmeister et al. (2011b) and Wetterich et al. (2009) respectively.

10 The absolute ice contents of the LIG deposits are very similar for Bol'shoy Lyakhovsky Island and the Oyogos  
11 Yar coast and up to half as low as those of the Yedoma Ice Complex and Holocene deposits at both sites. Thus,  
12 the freezing and thawing processes and moisture content of LIG thermokarst lake sediments are similar but clearly  
13 different from those of the younger horizons. The MS for the LIG deposits is similar at both sites, showing  
14 comparably high contents of magnetic minerals. These contents are up to twice as high as those of the Yedoma  
15 Ice Complex and Holocene horizons. This could mean that the source material in the LIG was different.

16 The TOC contents show slight differences for both sites, with a mean of 2.4 wt% at Bol'shoy Lyakhovsky and 3.5  
17 wt% at Oyogos Yar. In contrast, Yedoma Ice Complex and Holocene deposits show higher TOC values on  
18 Bol'shoy Lyakhovsky with 3.2 and 7.8 wt%, respectively, if compared to Oyogos Yar with 2.7 and 6.2 wt%,  
19 respectively. Different environmental conditions could play an important role and influence the preservation of  
20 organic matter. Regardless, the Holocene deposits contain two to three times higher wt% of organic matter. The  
21 TOC/TN ratio as an indicator for the source of/degree of decomposition of the organic matter in the LIG deposits  
22 is very similar on Bol'shoy Lyakhovsky and on Oyogos Yar. The values for the younger deposits are in a similar  
23 range (Figure 10), indicating a similar degree of decomposition of organic matter.

24 The mean carbonate content in LIG (2.3 wt%), Yedoma Ice Complex (0.5 wt%), and Holocene (1.6 wt%) deposits  
25 on Bol'shoy Lyakhovsky Island is much lower if compared to the respective horizons on Oyogos Yar with 6.4,  
26 3.9, and 3.5 wt%, respectively. This reflects a higher share of shells of mussels, gastropods, and ostracods in the  
27 Oyogos Yar deposits. At each site, the Krest-Yuryakh deposits have the highest carbonate content.

28



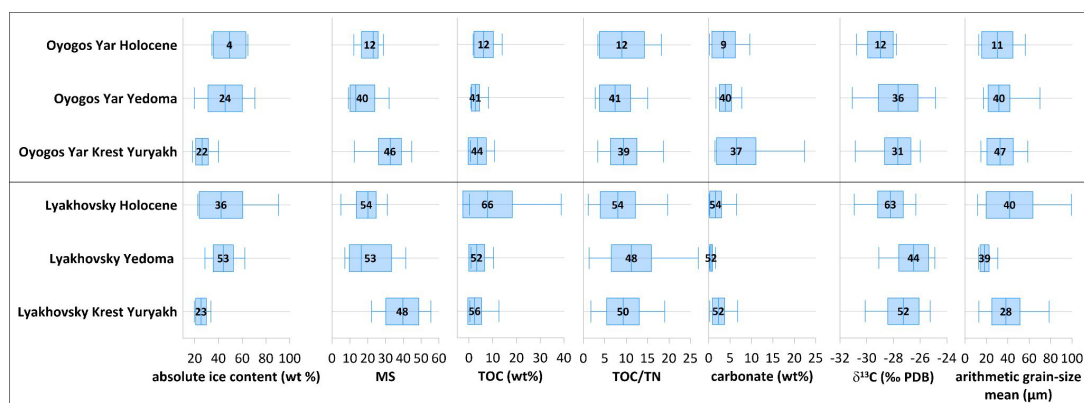

1  
 2 **Figure 10.** Boxplots of sediment data from both study sites, including the LIG (Krest-Yuryakh) horizon and the  
 3 stratigraphic younger late Pleistocene Yedoma Ice Complex (mostly MIS 3) and Holocene thermokarst (MIS 1)  
 4 horizons. The boxplots show the standard deviation, the arithmetic mean, and the IQR (interquartile range). The  
 5 numbers correspond to the respective number of samples included (Schirrmeister et al., 2011a, 2011b; Wetterich et al.,  
 6 2009).

7  
 8 The mean  $\delta^{13}\text{C}$  values of TOC for the LIG deposits are almost identical, with  $-27.3\%$  on Bol'shoy Lyakhovsky  
 9 and  $-27.7\%$  on Oyogos Yar. The respective values from Yedoma Ice Complex deposits are  $-26.5\%$  and  $-27.6\%$ ,  
 10 and from Holocene thermokarst deposits are lower with  $-28.3\%$  and  $-29.0\%$ . The relationship between TOC/TN  
 11 and  $\delta^{13}\text{C}$  indicates a mixture of organic matter derived from C3-type terrestrial plants and lacustrine algae. A large  
 12 number of data points plot along the mixing line between both endmembers (Figure S4).

13 The mean arithmetic grain size for the LIG deposits is  $38.2\ \mu\text{m}$  on Bol'shoy Lyakhovsky and  $32.8\ \mu\text{m}$  on Oyogos  
 14 Yar. The Yedoma deposits of Bol'shoy Lyakhovsky have a much smaller mean grain size of  $18.2\ \mu\text{m}$ , while the  
 15 Holocene deposits are coarser, with a mean of  $41.6\ \mu\text{m}$  (Figure 10). The younger Yedoma and Holocene deposits  
 16 of Oyogos Yar have a similar mean arithmetic grain size as the LIG sediments with  $31.7$  and  $30.0\ \mu\text{m}$ . This shows  
 17 that the deposition conditions in the thermokarst lakes were similar in both areas during the LIG. On Bol'shoy  
 18 Lyakhovsky, the deposition conditions and/or the sources of material in the stratigraphically younger units have  
 19 changed more than at Oyogos Yar.

20

## 21 5.2 Last Interglacial chronology and dating uncertainties

22 Different geochronological method results are available for the reconstruction of the timescale of Arctic permafrost  
 23 dynamic and corresponding investigations on feedbacks of periglacial landscapes and climate changes. Of core  
 24 importance are radiocarbon dating (e.g. Wetterich et al., 2014), tephrochronology (e.g. Froese et al., 2009),  
 25 optically- and infrared-stimulated luminescence (OSL and IRSL; e.g., Murton et al., 2022), radioisotope  
 26 disequilibria ( $^{230}\text{Th}/^{234}\text{U}$ ) of frozen peat (e.g. Wetterich et al., 2016), uranium isotope ( $^{234}\text{U}/^{238}\text{U}$ ) series (Ewing et  
 27 al., 2015), and  $^{36}\text{Cl}/\text{Cl}$  radionuclide ratios of ground ice (e.g. Blinov et al., 2009). However, dating methods ranging  
 28 beyond radiocarbon maximum finite ages show specific challenges when applied to frozen material. Additionally,  
 29 when fusing the dating results into one single multi-method chronology, a careful interpretation is required because  
 30 individual methods use different components of permafrost deposits, including organic, mineral, or ice



1 components. Uncertainties also arise from unknown influences of freezing and thawing dynamics on chemical and  
2 physical parameters, which are important to many age-determination techniques.

3 The chronostratigraphy of the LIG and its MIS 5 context relies on a few luminescence ages available from  
4 Bol'shoy Lyakhovsky Island and the Oyogos Yar coast. The stratigraphic position at studied sites still outlines  
5 challenges, especially from vertical discontinuities and hiatus. Currently, available age information of MIS 5-  
6 related deposits is summarized in Figure 11. Sediments, which are stratigraphically older than Krest Yuryakh,  
7 were found along the Laptev Strait coast as Buchchagy Ice Complex dated using  $^{230}\text{Th}/\text{U}$  to MIS 5e - MIS 5b  
8 ( $126 \pm 16/-13$  ka to  $89 \pm 5$  ka, Wetterich et al., 2019, Opel et al., 2017). The large variation of  $^{230}\text{Th}/\text{U}$ -ages  
9 impedes highly resolved, millennial paleo-climate interpretations.

10 Stadal conditions are recorded in floodplain sediments locally named as Kuchchugui stratum that has been  
11 cryostratigraphically aligned with the MIS 6 (Tumskoy and Kuznetsova, 2022),

12 IRSL ages from Bol'shoy Lyakhovsky of  $102 \pm 16$  and  $99 \pm 15$  ka suggest ~~its generation~~ during MIS 5c, a period  
13 younger than the LIG. Nevertheless, corresponding deposits associated with the Kuchchugui stratum were dated  
14 by IRSL to slightly older ages ( $112.5 \pm 9.6$  -  $102.4 \pm 9.7$  ka) at the mainland coast of Oyogos Yar (Opel et al., 2017).  
15 In this context, the newly IRSL-dated Krest Yuryakh thermokarst deposits provide, for the first time, robust age  
16 control for the LIG based on three consistent ages from two samples and two grain size fractions and with smaller  
17 age uncertainties compared to previous luminescence dating results., with ages of  $127.3 \pm 6.1$ ,  $117.8 \pm 6.8$ , and  
18  $117.6 \pm 6.0$  ka (Table 1; Figure 11).

19 The observed luminescence properties confirm a reliable luminescence - dose correlation for successful curve  
20 fitting and age modeling. The coefficients of variation below 6 % testify suitable measurement conditions and  
21 reproducible signals. The low standard deviation below 6 % and corresponding low skewness below 0.8 document  
22 sufficient signal reset and call for the application of the central age model (CAM). The typical challenges in dating  
23 permafrost samples related to sediment mixing are not indicated in our samples nor in the sampled sediment  
24 section. The estimates of the paleo-water content were primarily based on the measured in-situ water content.  
25 Although slight variations may have occurred over time, we assume that the sampled layers remained frozen and  
26 hence, have kept the measured water content relatively constant. Nevertheless, uncertainties remain due to the fact  
27 that the water was present not in its liquid but in its frozen form with potential effects on the penetration depth of  
28 ionizing radiation. To account for the potential variations in the past plus uncertainties from radiation field  
29 modeling based on water instead of ice, we included an overall water content uncertainty of 5 %. Site-specific  
30 uncertainties may also arise from the unknown evolution (esp. with respect to timing) of the overburden and its  
31 effects on the cosmogenic dose rate due to permafrost formation with sediment aggradation and permafrost  
32 degradation with thaw subsidence. We evaluated the influence of an early reduction of overburden thickness by  
33 comparing the full thickness of 35 m to 29 m, which would be more comparable to modern thickness assumptions.  
34 As both overburden thicknesses are already strongly attenuating the incoming cosmic radiation, the effect on ages  
35 is less than 1 %.

36

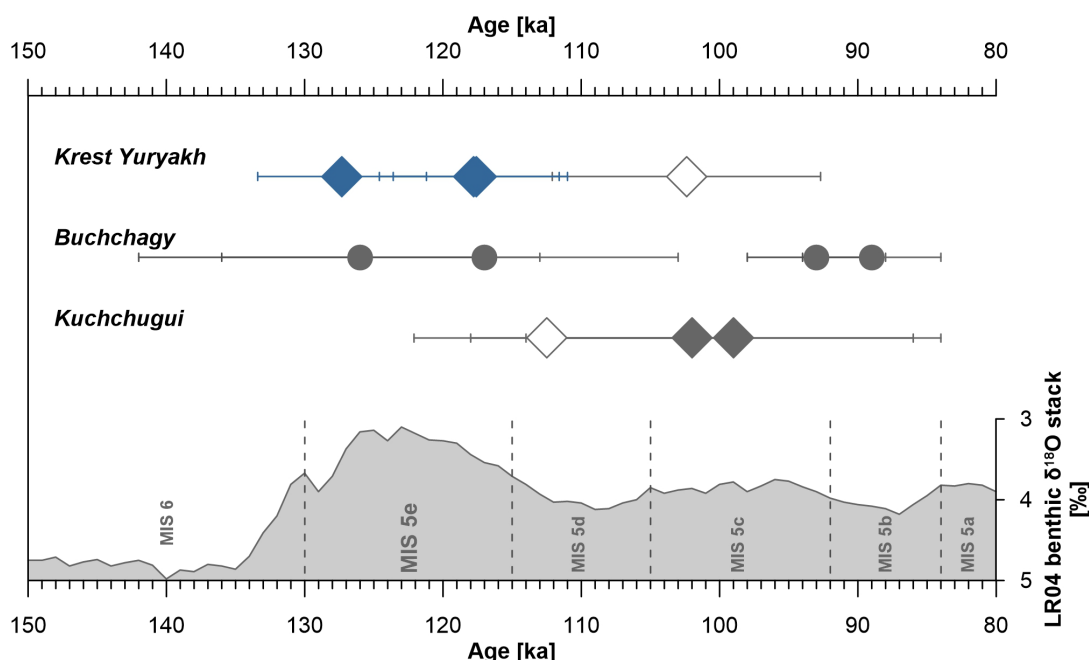

1  
2  
3  
4  
5  
6  
7  
8  
9

**Figure 11.** Age information obtained by IRSL (diamonds) and  $^{230}\text{Th}/\text{U}$  dating (circles) of cryostratigraphic units exposed at both coasts of the Dmitry Laptev Strait and aligned with MIS 5. White symbols refer to samples from the Oyogos Yar mainland coast, and filled symbols to those from the southern coast of Bol'shoy Lyakhovsky Island – compared to the LR04 benthic stack (Lisiecki and Raymo, 2005). Age determinations of Krest-Yuryakh lake deposits are from this study (highlighted in blue; Bol'shoy Lyakhovsky) and Opel et al. (2017; Oyogos Yar), Buchchagy Ice Complex from Wetterich et al. (2016; Bol'shoy Lyakhovsky) and Kuchchugui floodplain deposits from Opel et al. (2017; Oyogos Yar) and Andreev et al. (2004; Bol'shoy Lyakhovsky).

### 10 5.3 Proxy-based quantitative paleoclimate reconstructions compared to PMIP model simulations

11 When we compare the proxy-based and modeled climate and environmental parameters, regional differences  
 12 between Bol'shoy Lyakhovsky Island and the Oyogos Yar coast are obvious, as well as differences between  
 13 different proxy reconstructions at the same site (Table 7). The general pattern, however, is that all proxy-based  
 14 MTWA reconstructions indicate significantly warmer-than-today conditions.

15 For MTWA on Bol'shoy Lyakhovsky Island pollen, plant macrofossils, beetles, and chironomids overlap at 10.3-  
 16 10.5 °C . The modeled temperatures (Plobs+(lig127k-PI) are distinctly lower (Figure 12). BrGDGT-based AIR  
 17 GST are lower (2.8±0.3 °C) but fit well with the MTWA estimates since they integrate the entire growing season  
 18 of bacteria. At Oyogos Yar, the MTWA of pollen, beetles, and chironomids overlaps at 12-12.6 °C, while plant  
 19 macrofossils indicate higher MTWA. The modeled temperatures for Oyogos Yar are again distinctly lower but are  
 20 similar to those of Bol'shoy Lyakhovsky. The mean temperatures of the coldest month (MTCO) show joint  
 21 overlaps between beetles and model data between -32.6 and -29.8 °C for Bol'shoy Lyakhovsky Island and -33.0  
 22 and -30.2 °C. For the mean annual precipitation (MAP), pollen and model data of PaleoMIP concur between 228-  
 23 327 mm for Bol'shoy Lyakhovsky Island (i.e., higher than at present, which is also implied by GDGTs) and 230-  
 24 251 mm for Oyogos Yar. The WD of thermokarst lakes, which were reconstructed using chironomids, overlap  
 25 between 1.7 and 3.3 m for both sites. The clumped-isotope-reconstructed water temperature of these lakes is  
 26 10.2±3.0 and 10.3±3.2 °C near the surface and 5.3 °C at the bottom.



1 The generic LandPoint data of PaleoMIP overlap quite well for MTWA with most of the proxy data from Oyogos  
 2 Yar, with chironomid data, and a bit with plant macrofossil data from Bol'shoy Lyakhovsky (Figure 12). For  
 3 MTCO, a small overlap is visible with beetle data from Oyogos Yar. For MAP PaleoMIP reconstruction, the three  
 4 points and pollen data from Bol'shoy Lyakhovsky overlap between 258 and 327 mm.  
 5 The differences ~~between different~~ proxy reconstructions and between the two locations can have various causes.  
 6 For example, pollen, plant macrofossils, beetles, and chironomids may have reached their detectable stage in the  
 7 fossils at different times during the summer months. Thus, different conditions may have prevailed between early,  
 8 peak, and late summer during MIS 5e. On the other hand, MIS 5e lasted about 9 ka between 125 and 116 ka (van  
 9 Nieuwenhove et al., 2011). Unfortunately, the dating results available to us do not allow us to determine more  
 10 precisely whether our records relate to early, middle, or late MIS 5e. Therefore, differences may also have  
 11 stratigraphic and/or chronological causes.

12  
 13 **Table 7: LIG proxy-based quantitative reconstructions and paleoclimate modeling results of Mean Air Temperature of**  
 14 **the Warmest Months (MTWA), Mean Temperature of the Coldest Month (MTCO), Growing Season Temperature (Air**  
 15 **GST, April to October), Mean Annual Precipitation (MAP), and Water Depth (WD) and Water Temperature ( $T_{\text{water}}$ )**  
 16 **of thermokarst lakes on Bol'shoy Lyakhovsky Island and the Oyogos Yar mainland coast. Values in brackets refer to**  
 17 **the present-day reference from ERA5 (1990-2019). n/a – not applicable.**

| <b>Fossil proxy</b>                                 | <b>MTWA</b>  | <b>Air GST</b> | <b>MTCO</b>    | <b>MAP</b> | <b>WD</b>  | <b>Open <math>T_{\text{water}}</math></b> | <b>Bottom <math>T_{\text{water}}</math></b> |
|-----------------------------------------------------|--------------|----------------|----------------|------------|------------|-------------------------------------------|---------------------------------------------|
|                                                     | [°C]         | [°C]           | [°C]           | [mm]       | [m]        | [°C]                                      | [°C]                                        |
| <b>LandPoint</b>                                    |              |                |                |            |            |                                           |                                             |
| PaleoMIP Modeling                                   | n/a          | n/a            | n/a            | 328±70     | n/a        | n/a                                       | n/a                                         |
| PIobs+(lig127k-PI)                                  | 13.6±0.9     | n/a            | -38.7±1.0      | n/a        | n/a        | n/a                                       | n/a                                         |
| (ERA5 reanalysis)                                   | (11.0)       | n/a            | (-36.3)        | (259)      | n/a        | n/a                                       | n/a                                         |
| <b>Oyogos Yar coast</b>                             |              |                |                |            |            |                                           |                                             |
| PaleoMIP Modeling                                   | n/a          | n/a            | n/a            | 285±55     | n/a        | n/a                                       | n/a                                         |
| PIobs+(lig127k-PI)                                  | 4.5±1.2      | n/a            | -31.6±1.4      | n/a        | n/a        | n/a                                       | n/a                                         |
| (ERA5 reanalysis)                                   | (7.8)        | n/a            | (-34.4)        | (243)      | n/a        | n/a                                       | n/a                                         |
| Clumped isotopes<br>( <i>Pisidium casertanum</i> )  | n/a          | n/a            | n/a            | n/a        | n/a        | n/a                                       | 5.3±1.5                                     |
| Clumped isotopes<br>( <i>Cytherissa lacustris</i> ) | n/a          | n/a            | n/a            | n/a        | n/a        | 10.3±3.0                                  | n/a                                         |
| Clumped isotopes<br>( <i>Candona candida</i> )      | n/a          | n/a            | n/a            | n/a        | n/a        | 10.2±3.2                                  | n/a                                         |
| Chironomids                                         | 12.0 to 13.8 | n/a            | n/a            | n/a        | 1.1 to 3.3 | n/a                                       | n/a                                         |
| Beetles                                             | 8 to 14.0    | n/a            | -38.0 to -26.0 | n/a        | n/a        | n/a                                       | n/a                                         |
| Plant macrofossils                                  | 12.7 to 15.3 | n/a            | n/a            | n/a        | n/a        | n/a                                       | n/a                                         |
| Pollen                                              | 9.7±2.9      | n/a            | n/a            | 229±22     | n/a        | n/a                                       | n/a                                         |
| <b>Bol'shoy Lyakhovsky Island</b>                   |              |                |                |            |            |                                           |                                             |
| PaleoMIP Modeling                                   | n/a          | n/a            | n/a            | 278±50     | n/a        | n/a                                       | n/a                                         |



|                    |              |           |            |        |            |     |     |
|--------------------|--------------|-----------|------------|--------|------------|-----|-----|
| Plobs+(lig127k-PI) | 4.4±1.0      | n/a       | -31.2±1.4  | n/a    | n/a        | n/a | n/a |
| (ERA5 reanalysis)  | (2.5)        | n/a       | (-33.1)    | (262)  | n/a        | n/a | n/a |
| Air GST (GDGTs)    | n/a          | 2.8 ± 0.3 | n/a        | n/a    | n/a        | n/a | n/a |
| Chironomids        | 9.4 to 15.3  | n/a       | n/a        | n/a    | 1.7 to 5.6 | n/a | n/a |
| Beetles            | 8.0 to 10.5  | n/a       | -34 to -26 | n/a    | n/a        | n/a | n/a |
| Plant macrofossils | 10.3 to 12.9 | n/a       | n/a        | n/a    | n/a        | n/a | n/a |
| Pollen             | 9.0±3.0      | n/a       | n/a        | 271±56 | n/a        | n/a | n/a |

1  
 2 Present-day ERA5 data has a severe bias over sea ice, especially during periods with cold temperatures;  
 3 temperatures are overestimated by up to 10°C when the air temperature is around -40°C (Wang et al., 2019, Batrak  
 4 & Müller, 2019). The differences between PaleoMIP model's land-sea mask and the actual coastline during the  
 5 LIG, concerning especially MAP and MTWA, might lead to underestimated MAP and MTWA. The MTWA for  
 6 the generic land point (13.6±0.9 °C, Table 6) is in the range of the reconstructed data sets between about 6 and 15  
 7 °C (Table 7). On the other hand, analog-based climate reconstruction methods applied to biotic proxies may  
 8 overestimate temperatures in northern Siberia (Klemm et al., 2013). The sites are presently located at the lower  
 9 temperature range of the training dataset, and as such, the taxa present in the observations are not covered with  
 10 their full occurrence range, which typically results in biases toward higher temperature values.

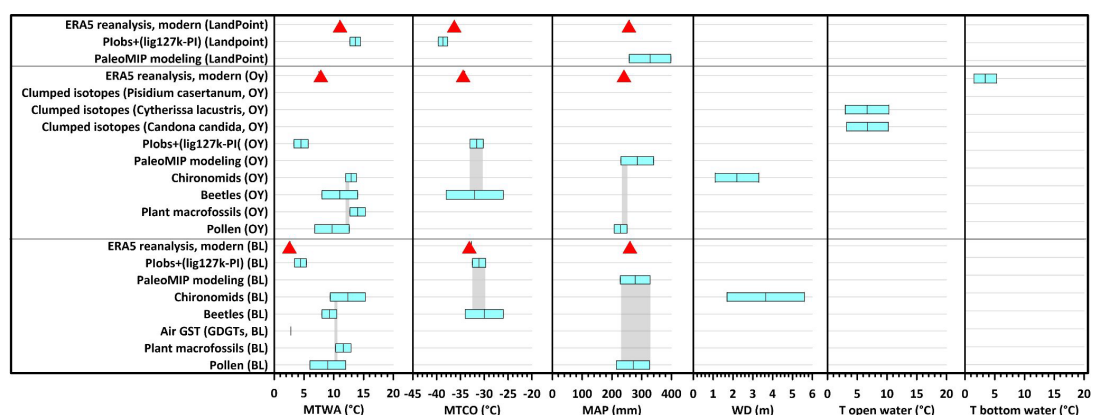

12  
 13 **Figure 12. Boxplot of proxy-reconstructed and modeled climate and environmental data according to Table 7. BL –**  
 14 **Bol'shoy Lyakhovskiy, OY – Oyogos Yar, MTWA - mean temperature of the warmest month, MTCO – mean**  
 15 **temperature of the coldest month, WD – water depth of thermokarst lakes, T open water – surface water temperature**  
 16 **of lakes, T bottom water – bottom water temperature of lakes. Grey-shaded areas indicate overlap ranges, red triangles**  
 17 **indicate the present-day reference.**

#### 18 19 5.4 Biogenic carbonate: Clumped and stable isotopes

20 All species analyzed (*Candona candida*, *Cytherissa lacustris*, *Pisidia casertanum*) require freshwater habitats and  
 21 thus depend on the presence of open water bodies, which are present solely in summer in modern times. Thus, the



1 derived temperatures are interpreted as reflecting the mean temperature of the warm season that integrates all ice-  
2 free periods, i.e., the growth window of ostracods and bivalves.  
3 Ostracod-derived clumped isotope temperatures ( $T\Delta_{47}$ ) are considerably warmer ( $10.2\pm 3.2$  and  $10.3\pm 3.0$  °C) for  
4 *C. candida* and *Cy. lacustris*, respectively) than those of *P. casertanum* ( $+5.3\pm 1.5$  °C) (Table 5). This difference  
5 is attributed to differing habitation depths, with ostracods proliferating throughout the water column (Scharf, 1998;  
6 Decrouy et al., 2012), and therefore recording surface and upper water column temperatures, and *P. casertanum*,  
7 a benthic species that burrows continually into sediments (McMahon and Bogan, 2001) and thus records bottom  
8 water temperature. Monitoring data in a polygon pond at Oyogos Yar during August 2007 shows that mean air  
9 and surface water temperatures differed by only 0.3°C, while bottom water at 0.6 m WD and only about 0.2 m  
10 above the permafrost table showed almost constant water temperature of 3.6 °C (Boike et al., 2008). Thus, we  
11 conclude that our reconstructed ostracod temperatures are likely similar to, or slightly below, warm season mean  
12 surface air paleotemperature. Our summer surface  $T\Delta_{47}$  reconstructions of ca. 10 °C are considerably warmer (ca.  
13 +2 °C) than modern and in good agreement with other air temperatures derived in this study.

14 Our measured *Cy. lacustris*  $\delta^{18}\text{O}$  values show good agreement with those previously recorded from the LIG at  
15 Oyogos Yar in section Oy7-08 ( $-14.5$  to  $-12.2$  ‰, Wetterich et al., 2009). However, our *C. candida* values are ca.  
16 2 to 3 ‰ more negative than those previously recorded in Oy7-08 ( $-12.6$  to  $-11.3$  ‰, Wetterich et al., 2009).  
17 Wetterich et al. (2008a) showed that offsets in  $\delta^{18}\text{O}$  between single species in neighboring polygon ponds of 2 to  
18 3 ‰ are common and this likely could explain the discrepancies observed here.

19 Stable isotope compositions of ostracod calcite are driven by temperature and the isotopic composition of the  
20 surrounding precipitation waters, making them effective proxies for paleoenvironmental conditions (Xia et al.,  
21 1997; von Grafenstein et al., 1999). For comparison with our paleorecord, modern *C. candida*  $\delta^{18}\text{O}$  has been  
22 measured at Samoylov Island (72.37°N, 126.48°E), in the Lena Delta, ranging between  $-17.7$  and  $-10.4$  ‰  
23 (Wetterich et al., 2008a), the Moma region (NE Yakutia, 66 °N, 143 °E) where values between  $-15.2$  and  $-11.9$   
24 ‰ were recorded, and in Central Yakutia (62 °N, 129 °E) with values between  $-11.0$  and  $-8.9$  ‰ (Wetterich et al.,  
25 2008b). The more continental location of the latter two records, compared to the Samoylov record, induces higher  
26 temperature amplitudes, warmer summers, and higher evaporation and is reflected in more enriched (less negative)  
27 modern carbonate  $\delta^{18}\text{O}$ . The similarity of Oya 5-1 data to Samoylov Island, compared with the more continental  
28 locations, suggests a precipitation and temperature regime closer to the former site in the modern day. Samoylov  
29 Island is at a similar latitude as Oyogos Yar but records mean July air temperatures between 4 to 8 °C,  
30 approximately 1 to 5 °C warmer due to its delta setting influenced by warm Lena River water (Boike et al., 2019).  
31 Calculated  $\delta^{18}\text{O}$  of carbonate precipitation waters between  $-18.5$  and  $-16.6$  ‰ are similar to modern summer  
32 rainfall values, which range from  $-20.2$  to  $-11.7$  ‰ (Opel et al., 2011). Small water bodies, such as those inhabited  
33 by ostracods, have been shown to be predominantly fed by precipitation in northern Siberia (Wetterich et al.,  
34 2008a). Thus, their  $\delta^{18}\text{O}$  will largely reflect that of precipitation with a small shift towards more positive values  
35 (ca. +2 ‰), driven by evaporative processes (Wetterich et al., 2008b). The similarity of our reconstructed water  
36  $\delta^{18}\text{O}$  to modern precipitation would suggest a summer precipitation regime similar to the modern day.

37

### 38 5.5 Last Interglacial ecosystems

39 The paleobotanical and entomological data prove the presence of an open subarctic shrub tundra with restricted  
40 steppe areas in the area of Bol'shoy Lyakhovskiy Island and the existence of an open forest tundra at Oyogos Yar  
41 during the LIG. The presence of the ant *Leptothorax acervorum* and the true bug *Sciocoris microphthalmos* in the



1 Oyogos Yar records is notable as both species at present inhabit forested areas, while tundra-steppe indicators are  
2 rare and only represented by *Morychus viridis* and the meadow-steppe species *Protapalochrus arcticus* (former  
3 *Troglocollops arcticus*). True steppe insects are not present in Oyogos Yar but two steppe weevils  
4 (*Stephanocleonus eruditus* and *S. fossulatus*) were recorded in the Bol'shoy Lyakhovsky fauna. The presence of  
5 tall boreal shrubs and even trees during the LIG in an area that is covered with arctic tundra today is noteworthy.  
6 The only woody plants that are currently occurring at Oyogos Yar are the dwarf shrubs *Dryas octopetala* ssp.  
7 *punctata* and *Salix polaris*, the latter forming thin prostrate stems piercing through and protected by the moss  
8 cover. Ericaceae, Betulaceae, or other mainly boreal taxa do not occur in the study area today (Aleksandrova,  
9 1980; Kienast et al., 2008) but were represented by many species during the LIG, e.g., *Betula pendula*, *B.*  
10 *divaricata*, *B. fruticosa*, *B. nana* s.l., *Arctostaphylos uva-ursi*, *Andromeda polifolia*, *Chamaedaphne calyculata*,  
11 *Rhododendron tomentosum*, and *Vaccinium vitis-idaea*. The majority of plant species recovered in LIG deposits  
12 at both sides of the Dmitry Laptev Strait are extralimital, i.e., they do not occur in high arctic tundra today but  
13 considerably further south. At Oyogos Yar, only ca. 80 km to the southeast of the Bol'shoy Lyakhovsky site, tree  
14 species like *Larix gmelinii*, *Betula pendula* s.l., and *Alnus hirsuta* were already present during the LIG, indicating  
15 that the treeline was shifted about 270 km further north than currently (Kienast et al., 2011). The nearest known  
16 modern occurrence of grey alder is located at the Sobolokh Mayan River 910 km southwest of Oyogos Yar  
17 (Krasnoborov and Malyshev, 2003; GBIF, 2023).

18 Numerous coprophilous Sordariaceae fungi spores found in our LIG deposits point to the presence of grazing herds  
19 during this time. In West Beringia, forest-steppe-tundra provided grazing areas for large Pleistocene mammals so  
20 they could survive the Pleistocene interglaciations (Kuzmina, 2015b).

21 Plant-derived *seda*DNA shows substantial overlap with the plant macrofossil record in recovering taxa that do not  
22 occur at Bol'shoy Lyakhovsky today, including *Betula*, several Ericaceae species, and *Potamogeton*. The  
23 taxonomic composition in profile L14-04 from Bol'shoy Lyakhovsky Island indicates that the interglacial  
24 vegetation was likely a mosaic of subarctic shrub-tundra and dry steppe communities with arctic-alpine and pioneer  
25 plants. The record shows many similarities in the *seda*DNA plant record with the MIS 5e record from the Batagay  
26 megaslump (Courtin et al., 2022).

27 A major discrepancy to prior studies but also a highlight of our record is the detection of *Larix*, *Picea*, and *Populus*  
28 in the interglacial strata, suggesting that the treeline reached indeed as far north as Bol'shoy Lyakhovsky Island  
29 (73.3 °N). *Larix*-DNA was detected in several samples, all of which showed at least 2% *Larix* in the pollen  
30 assemblage (Zimmermann et al., 2017). The pollen records of *Larix* are usually underrepresented because pollen  
31 is produced in low quantities, and due to a high fall speed, the potential for long-distance dispersal is low (Sjögren  
32 et al., 2008; Jørgensen et al., 2012; Niemeyer et al., 2015). Hence, single pollen grains have been accepted as  
33 evidence for the local presence of *Larix* (Edwards et al., 2005). We verified the presence of *Larix*-DNA by re-  
34 amplification and re-sequencing with *Larix*-specific primer pairs, corroborating the authenticity of even low *Larix*  
35 sequence counts in the metabarcoding record. Beetle remains and plant macrofossils derived from profile R35,  
36 about a kilometer away from this site, indicate subarctic shrub tundra and the absence of trees at Bol'shoy  
37 Lyakhovsky Island. Hence, we conclude that *Larix* was heterogeneously distributed in the landscape of Bol'shoy  
38 Lyakhovsky Island, likely as individual trees or stands of trees within an open forest tundra, where trees were  
39 growing in more protected sites with a favorable microclimate. Evidence of the presence of *Larix* trees as far north  
40 as Kotelny Island during MIS 3 (van Geel et al., 2017) substantiates our assumptions.





1 In our LIG *sedaDNA* record, *Larix* was mostly accompanied by evergreen *Picea* and deciduous, broadleaved  
2 *Populus*, yet the absence of macrofossil and pollen evidence requires a critical evaluation. The genetic marker  
3 used in this study is located on the chloroplast genome, which in the genus *Picea* is inherited paternally via pollen  
4 (Sutton et al., 1991). As such, *Picea* pollen, susceptible to long-distance transport, could be a source of DNA in  
5 our record. Indeed, samples in which *Picea*-DNA was detected contained relatively high amounts of *Picea* pollen  
6 grains. However, not all samples in which pollen proportions were relatively high also contained *Picea*-DNA,  
7 rendering this explanation uncertain as well. Moreover, previous work implies that pollen may not be the source  
8 of *Picea sedaDNA* (Sjögren et al., 2017; Niemeyer et al., 2017; Parducci et al., 2017) likely because the pollen  
9 exine is very durable, making the pollen resistant to degradation but at the same time prevent the release of DNA  
10 during our gentle DNA extraction procedure. A similar discussion about the authenticity of *Picea abies* in a  
11 *sedaDNA* record from the Ural Mountains was led by Clarke et al. (2020), where findings of stomata were  
12 considered strong evidence for local occurrence. One of our samples indeed contained *Picea* cf. stomata, but  
13 identifying the species-specific source of stomata was difficult, and they cannot be considered as strong evidence.  
14 In contrast to *Picea*, the chloroplast genome of *Populus* is maternally inherited, and therefore, long-distance  
15 transported pollen as a source of *Populus*-DNA can be excluded (Rajora and Dancik, 1992). Today, *Populus*  
16 *suaveolens* populations occur relatively far north, with the northernmost documented individual in the Lena Delta  
17 (73.2 °N, 128.6 °E; Seregin, 2023). As modern woody taxa penetrate the subarctic tundra belt along rivers  
18 (Aleksandrova, 1980), it is possible that during the LIG, *P. suaveolens* could have progressed into our study area  
19 at riversides and floodplains. The map “Late Pleistocene (Riss-Würm), 120 000 Years” of Alekseev et al. (1991b)  
20 shows river valleys and temporary lakes on Bol’shoj Lyakhovsky Island and around Svyatoy Nos. In addition,  
21 most of the area is labeled as relict alluvial and lacustrine plains.  
22 Unless macrofossil evidence confirms the presence of *Picea* or *Populus* in the area, the question of whether these  
23 taxa were truly part of the interglacial vegetation cannot be answered fully. However, given that (1) absence of  
24 evidence is not evidence of absence, (2) *Populus* has been detected more often in the DNA than in the macrofossil  
25 record (Kjær et al., 2022) or the surrounding vegetation (Alsos et al., 2018), (3) the findings of extralimital species  
26 in interglacial strata (Kienast et al., 2008), and (4) the uncertainty about alternative DNA sources, the possibility  
27 remains that *Picea* and *Populus* were growing that far north during the LIG.  
28 Aquatic macrophytes such as *Potamogeton perfoliatus*, *Stuckenia filiformis*, *S. vaginata*, *Callitriche*  
29 *hermaphroditica*, and *Batrachium* sp. were abundant during the LIG but are completely absent today. These  
30 findings are another indication of warmer than present-day conditions (Kienast et al., 2008, 2011; Stoof-  
31 Leichsenring et al., 2022). The aquatic freshwater LIG habitats are further characterized by fossil chironomid,  
32 cladocera, ostracod, and mollusk communities. The presence of semi-terrestrial chironomid taxa at high  
33 abundances and low abundances of cold-stenotherm taxa can indicate a transition from the preceding colder MIS  
34 6 conditions to a warmer MIS 5e setting and probably correspond to the lower part of the R35 section on Bol’shoj  
35 Lyakhovsky Island (Ilyashuk et al., 2006). Here, the subdominant taxa *Chironomus anthracinus*-type, *Cricotopus*  
36 *laricomalis*-type, *Tanytarsus pallidicornis*-type, and *Endochoronomus albipennis*-type prefer relatively warm and  
37 productive lakes (Nazarova et al., 2015, 2023), while *Tanytarsus lugens*-type and *Parakiefferiella triquetra*-type  
38 taxa are in contrast cold stenotherm and characteristic for oligotrophic cold subarctic lakes. *Limnophyes*,  
39 *Metriocnemus eurynotus*-type, and *Parametriocnemus-Paraphaenocladus* are typical for lake-level fluctuations  
40 (Massaferro and Brooks, 2002). *Smittia* might indicate shore erosion processes or unstable lake-level conditions  
41 (Brooks et al., 2008). The Oya 5-1 chironomid record from Oyogos Yar does not resolve lake development as R35



1 from Bol'shoy Lyakhovsky Island but instead aggregates different lake stages into one paleo-assemblage. The  
2 Oya5-1 cladoceran assemblages indicate habitats with a well-developed vegetated shallow littoral zone as well as  
3 pelagic open-water zones in the paleo-lake. The reconstructed WDs from chironomid data of  $1.7\pm 0.9$  m to  $5.6\pm 1.0$   
4 m for Bol'shoy Lyakhovsky and  $2.2\pm 1.1$  m for Oyogos Yar are within the range of measurements of modern  
5 thermokarst lakes of 1 to 6 m depth (e.g., Wilcox et al., 2022, Morgenstern et al., 2013, Kallistova et al., 2019 and  
6 references therein).

7 The LIG ostracod assemblages are characterized by species that tolerate considerable changes in temperature and  
8 salinity regimes that are comparable to modern conditions in the periglacial landscapes of East Siberia, where  
9 species such as *Candona candida*, *Fabaeformiscandona rawsoni*, and *Limnocytherina sanctipatricii* occur (Wetterich  
10 et al., 2008a, 2008b). Single findings of the thermophilous species *Cyclocypris ovum* – not present in modern  
11 environments of North Yakutia – indicate summer conditions distinctly warmer than today (Kienast et al., 2011).

12 The presence of benthic ostracods in lacustrine LIG deposits further indicates a sufficiently high oxygen content  
13 in the water column of the host waters. Furthermore, the waters must have been ice-free for a certain period during  
14 summer to facilitate the ostracod larvae development. As ostracods in high latitudes are apparently adapted to a  
15 relatively short ice-free period, they conduct asexual reproduction (parthenogenesis), which explains relatively  
16 high shares of adult females and only rare males in the fossil assemblages (Meisch, 2000). The high number of  
17 juvenile shells indicates short summers in which the development of ostracods did not always reach its final stage.  
18 The often-complete preservation of the fragile ostracod shells points to stillwater habitats and deposition, as well  
19 as *in-situ* preservation. The shallow sublittoral zone of thermokarst lakes and ice-wedge casts formed by melting  
20 wedge ice are the most probable habitats for the fossil ostracod assemblage (Wetterich et al., 2009; Kienast et al.,  
21 2011).

22 The discrepancy in the species inventories of the last and the current interglacials is certainly the result of climatic  
23 differences, i.e., the recent phase – the late Holocene – is comparatively cold in comparison to earlier warm stages  
24 in Northern Siberia. This is even true for the MIS 3 Interstadial when larch trees existed as far north as Kotel'ny  
25 Island (van Geel et al., 2017). Larch and other woody plants probably spread northward during the LIG when  
26 Kotel'ny Island was still part of the mainland. The connection of the New Siberian Archipelago with the mainland  
27 during the LIG can be deduced from the highly continental climate character existing adjacent to today's Dmitry  
28 Laptev Strait. The persistence of this potential feeding base for herbivores during preceding warm stages helps  
29 explain why large cold-adapted grazers survived earlier interglacials in Beringian refugia, which became centers  
30 of their dispersal during subsequent cold stages.

31

## 32 **6 Conclusions**

33 New IRSL ages confirm the LIG (MIS 5e) origin of the Krest Yuryakh ice-wedge pseudomorphs and lake  
34 sediments that are exposed at both coasts of the Dmitry Laptev Strait. The present study results are consistent with  
35 previous work interpreting the MIS 5e as a key warm period during which extensive permafrost thawing and  
36 thermokarst development occurred in north-eastern Siberia. The cryolithological features observed in the LIG  
37 deposits bear striking similarities to those of Lateglacial and early Holocene refrozen thermokarst deposits,  
38 suggesting comparable processes of deposition that were characterized by ground ice melting, surface subsidence,  
39 and thermokarst formation driven by climate warming.



1 Paleoclimate data synthesized from a variety of proxies – including plant macrofossils, aquatic and terrestrial  
2 invertebrates, and lipid biomarkers – indicate that temperatures during the LIG were significantly warmer than  
3 today. Mean temperatures of the warmest month (MTWA) reconstructed from proxies show a range of 6.0°C  
4 (pollen data of Bol'shoy Lyakhovsky) and 15.3 °C (plant macrofossils of Bol'shoy Lyakhovsky and chironomid  
5 of Oyogos Yar) and overlap of 10.3°C and 10.7°C for Bolshoy Lyakhovsky) and 12.0 and 12.6 °C for Oyogos  
6 Yar, demonstrating the pronounced warming of this period. However, one of the critical challenges in predicting  
7 future ecosystem responses lies in the fact that the land-ocean distribution during the LIG was markedly different  
8 from today, affecting the degree of continentality, which played a major role in modulating climate and ecosystem  
9 dynamics.

10 Paleoclimate models generally agree well with the mean temperature of the coldest month (MTCO) proxy data but  
11 consistently underestimate the mean temperature of the warmest month (MTWA) across proxy records when using  
12 modern land-sea configurations. This mismatch is significantly reduced when models incorporate land-sea  
13 distributions that more closely reflect those of the LIG. This adjustment highlights the importance of considering  
14 past land-sea configurations in regional paleoclimate modeling when comparing proxy and model results, a critical  
15 step in refining our understanding of Arctic climate dynamics during MIS 5e.

16 The strong ecosystem response to the LIG warming, reflected in the high diversity of proxies, shows the sensitivity  
17 of permafrost regions to rising temperatures. In particular, the development of thermokarst landscapes created a  
18 mosaic of terrestrial, wetland, and aquatic habitats, fostering an increase in biodiversity. This biodiversity is  
19 evident in the rich variety of terrestrial insects, vegetation, and aquatic invertebrates preserved in these deposits.  
20 In addition, the tree line extended 270 km further north during the LIG than it does today, yet the cold-adapted  
21 mammoth fauna managed to persist in this region, probably finding refuge in the microclimates created by the  
22 thermokarst landscape.

23 While the LIG is often used as an analog for future climate warming in the Arctic, there are important differences.  
24 Most notably, the LIG warming was driven primarily by increased summer insolation, whereas current Arctic  
25 warming so far is most pronounced in winter due to anthropogenic forcing and climate system feedback  
26 mechanisms. This seasonal distinction is crucial because many of the environmental changes relevant today,  
27 particularly those related to ecosystem processes and permafrost dynamics, occur during the transitional seasons  
28 (spring and fall) - for which we currently lack proxy data from MIS 5e.

29 Ultimately, our results highlight the complexity of Arctic climate responses and emphasize the sensitivity to  
30 seasonal factors, which are important aspects of future climate scenarios. Nevertheless, the lessons learned from  
31 MIS 5e, particularly regarding thermokarst development and ecosystem adaptation to warming, provide valuable  
32 insights into the potential future trajectory of permafrost regions in the context of ongoing climate change. Further  
33 research is essential, particularly to fill gaps in proxy data for transitional seasons and to refine model-proxy  
34 comparisons to improve our predictions of Arctic climate dynamics.

35



1    **7    Appendices**

2    Table A1: Overview of sample collections for cryolithological and fossil proxy studies of Krest Yuryakh deposits  
3    exposed at both coasts of the Dmitry Laptev Strait.

4    **8    Code availability**

5    not applicable

6    **9    Data availability**

7    Andreev, A.A., Grosse, G., Schirrneister, L., Kuznetsova, T.V., Kuzmina, S.A., Bobrov, A.A., Tarasov, P.E.,  
8    Novenko, E.Y., Meyer, H., Derevyagin, A.Yu., Kienast, F., Bryantseva, A., Kunitsky, V.V. (2010): Pollen records  
9    from Bol'shoy Lyakhovsky Island, Siberia. PANGAEA, <https://doi.org/10.1594/PANGAEA.736069>.

10    Andreev, A.A., Grosse, G., Schirrneister, L., Kuznetsova, T.V., Kuzmina, S.A., Bobrov, A.A., Tarasov, P.E.,  
11    Novenko, E.Y., Meyer, H., Derevyagin, A.Yu., Kienast, F., Bryantseva, A., Kunitsky, V.V. (2010): Pollen record  
12    of profile L11. PANGAEA, <https://doi.org/10.1594/PANGAEA.736068>.

13    Kienast, F., Schirrneister, L. (2017): Plant macrofossil records from permafrost deposits of the Bol'shoy  
14    Lyakhovsky Island (New Siberian Archipelago). PANGAEA, <https://doi.org/10.1594/PANGAEA.882619>

15    Kusch, S. (2021): GDGT data in Siberian permafrost deposits. PANGAEA,  
16    <https://doi.org/10.1594/PANGAEA.934054>

17    Schirrneister, L., Grosse, G., Kunitsky, V.V., Siegert, C. (2017): Sedimentological, biogeochemical and  
18    geochronological data from permafrost exposures of the Bol'shoy Lyakhovsky Island (Expedition 1999), site  
19    R23+40. PANGAEA, <https://doi.org/10.1594/PANGAEA.880949>

20    Schirrneister, L., Grosse, G., Kunitsky, V.V., Siegert, C. (2017): Sedimentological, biogeochemical and  
21    geochronological data from permafrost exposures of the Bol'shoy Lyakhovsky Island (Expedition 1999), site  
22    L14. PANGAEA, <https://doi.org/10.1594/PANGAEA.880937>

23    Schirrneister, L., Grosse, G., Kunitsky, V.V., Siegert, C. (2017): Sedimentological, biogeochemical and  
24    geochronological data from permafrost exposures of the Bol'shoy Lyakhovsky Island (Expedition 1999), site  
25    R22+60. PANGAEA, <https://doi.org/10.1594/PANGAEA.880948>

26    Schirrneister, L., Grosse, G., Kunitsky, V.V., Siegert, C. (2017): Sedimentological, biogeochemical and  
27    geochronological data from permafrost exposures of the Bol'shoy Lyakhovsky Island (Expedition 1999), site  
28    L11+40. PANGAEA, <https://doi.org/10.1594/PANGAEA.880935>

29    Schirrneister, L., Grosse, G., Kunitsky, V.V., Siegert, C. (2017): Sedimentological, biogeochemical and  
30    geochronological data from permafrost exposures of the Bol'shoy Lyakhovsky Island (Expedition 1999), site  
31    L13+80. PANGAEA, <https://doi.org/10.1594/PANGAEA.880936>

32    Schirrneister, L. (2009): Lithology, color and structural description of sediment profile L7-11, Appendix 6.1.  
33    PANGAEA, <https://doi.org/10.1594/PANGAEA.727667>

34    Schirrneister, L. (2009): Documentation of ice wedge L7-11. PANGAEA,  
35    <https://doi.org/10.1594/PANGAEA.727710>

36    Schirrneister, L. (2009): Lithology, color and structural description of sediment profile L7-16, Appendix 6.1.  
37    PANGAEA, <https://doi.org/10.1594/PANGAEA.727671>

38    Schirrneister, L. (2009): Documentation of ice wedge L7-16. PANGAEA,  
39    <https://doi.org/10.1594/PANGAEA.727714>

40    Schirrneister, L. (2009): Lithology, color and structural description of sediment profile L7-14, Appendix 6.1.  
41    PANGAEA, <https://doi.org/10.1594/PANGAEA.727669>



- 1 Schirrmeyer, L. (2009): Documentation of ice wedge L7-14. PANGAEA,  
2 <https://doi.org/10.1594/PANGAEA.727712>
- 3 Schirrmeyer, L. (2009): Lithology, color and structural description of sediment profile L7-08, Appendix 6.1.  
4 PANGAEA, <https://doi.org/10.1594/PANGAEA.727666>
- 5 Schirrmeyer, L. (2009): Documentation of ice wedge Oy7-01. PANGAEA,  
6 <https://doi.org/10.1594/PANGAEA.727717>
- 7 Schirrmeyer, L. (2009): Lithology, color and structural description of sediment profile Oy7-01, Appendix 6.1.  
8 PANGAEA, <https://doi.org/10.1594/PANGAEA.727673>
- 9 Schirrmeyer, L. (2009): Documentation of ice wedge Oy7-07. PANGAEA,  
10 <https://doi.org/10.1594/PANGAEA.727725>
- 11 Schirrmeyer, L. (2009): Lithology, color and structural description of sediment profile Oy7-07, Appendix 6.1.  
12 PANGAEA, <https://doi.org/10.1594/PANGAEA.727676>
- 13 Schirrmeyer, L. (2009): Documentation of ice wedge Oy7-08. PANGAEA,  
14 <https://doi.org/10.1594/PANGAEA.727734>
- 15 Schirrmeyer, L. (2009): Lithology, color and structural description of sediment profile Oy7-08-A/B, Appendix  
16 6.1. PANGAEA, <https://doi.org/10.1594/PANGAEA.727677>
- 17 Strauss, J., Laboor, S., Schirrmeyer, L., Grosse, G., Fortier, D., Hugelius, G., Knoblauch, C., Romanovsky, V.E.,  
18 Schädel, C., Schneider von Deimling, T., Schuur, E.A.G., Shmelev, D., Ulrich, M., Veremeeva, A., (2020):  
19 Geochemical, lithological, and geochronological characteristics of sediment samples from thermokarst deposits in  
20 Siberia and Alaska 1998-2016. PANGAEA, <https://doi.org/10.1594/PANGAEA.919062>.
- 21 Schwamborn, G., Wetterich, S. (2016): Geochemistry and physical properties of permafrost core L14-04.  
22 PANGAEA, <https://doi.org/10.1594/PANGAEA.868983>
- 23 Schwamborn, G., Wetterich, S. (2016): Characteristics of samples obtained during the expedition to Bol'shoy  
24 Lyakhovskiy Island in July/August 2014. PANGAEA, <https://doi.org/10.1594/PANGAEA.859265>
- 25 Schwamborn, G., Wetterich, S. (2016): Sample list and field descriptions of the L14 profiles studied in summer  
26 2014. PANGAEA, <https://doi.org/10.1594/PANGAEA.859305>
- 27 Zimmermann, H.H., Raschke, E., Epp, L.S., Stoof-Leichsenring, K.R., Schirrmeyer, L., Schwamborn, G.,  
28 Herzschuh, U. (2017): Pollen profile of sediment hand-pieces L14-04B. PANGAEA,  
29 <https://doi.org/10.1594/PANGAEA.878885>.
- 30 Zimmermann, H.H., Raschke, E., Epp, L.S., Stoof-Leichsenring, K.R., Schirrmeyer, L., Schwamborn, G.,  
31 Herzschuh, U. (2017): Pollen profile of sediment hand-pieces L14-04C. PANGAEA,  
32 <https://doi.org/10.1594/PANGAEA.878886>.
- 33 Zimmermann, H.H., Raschke, E., Epp, L.S., Stoof-Leichsenring, K.R., Schirrmeyer, L., Schwamborn, G.,  
34 Herzschuh, U. (2017): Pollen profile of sediment core L14-04. PANGAEA,  
35 <https://doi.org/10.1594/PANGAEA.878884>.
- 36 Clumped isotope sample and normalisation data will be uploaded to the EarthChem Library pending publication  
37 of this manuscript.

38

39 **10 Executable research compendium (ERC)**

40 not applicable

41 **11 Sample availability**



1 Original samples are available on request in the sample archives of the AWI Research Unit Potsdam.

2 **12. Video supplement**

3 not applicable

4 **13 Supplement link**

5 Supplement material\_Figures

6

7 **14 Team list**

8 not applicable

9 **15 Author contribution**

10 LS designed the paper concept, compiled the various results, carried out the cryolithological studies and  
11 evaluations, organized the writing process, and wrote the first manuscript draft. LS, TO, FK, TK, SK, VT, GG,  
12 VK, HaMe, GS, SB, SW, and MCF participated in one or more of the five expeditions to Bol'shoi Lyakhovskiy  
13 Island and the Oyogos Yar mainland coast between 1999 and 2014. MCF conducted the geochronological studies.  
14 HaMe was responsible for isotope chemistry studies. A number of co-authors were responsible for certain  
15 paleoproxies and environmental reconstructions based on them: AA - pollen, FK - plant macrofossils, mussels, AS  
16 - ostracods, plant macrofossils, LN - chironomids, LF - cladocerans, SK - insects, TK - mammals, UH, TB - pollen-  
17 based climate reconstructions, HHZ - *seda*DNA, SB, SU, SM - clumped isotope analysis, SK - lipid biomarkers,  
18 SW - ostracods. AP contributed with data on marine MIS 5e deposits. HeMa and GL carried out paleoclimate  
19 modeling. All authors were involved in the data interpretation, took part in the scientific discussions and helped  
20 with writing and editing the manuscript.

21 **16 Competing interests**

22 The authors declare that they have no conflict of interest.

23 **19 Acknowledgements**

24 We acknowledge funding from the following projects: BMBF project SYSTEM LAPTEV SEA 2000 (03G0134),  
25 INTAS project "Permafrost Dating" (INTAS 8133), IPY project 15 Past Permafrost "From the beginning of the  
26 Pliocene cooling to the modern warming – Past Periglacial Records in Arctic Siberia", DFG project "Late  
27 Quaternary warm stages in the Arctic" (SCHI 975/1-1), RFFI project № 06-05-64197, BMBF project  
28 CARBOPERM "Carbon in permafrost: formation, transformation, and release" (03 G 0836), Leverhulme Trust  
29 (Research Project Grant RPG-2020-334 for project "IsoPerm").

30

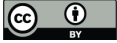

1 Labs and field parties  
2 We would like to thank all colleagues involved with sample processing in the various laboratories. We would also  
3 like to thank many AWI colleagues and local partners in Tiksi for their excellent and long-standing logistical  
4 support for field work at these remote study sites. This includes the expeditions to Bol'shoy Lyakhovsky Island in  
5 the summer of 1999, 2007 and in spring and summer 2014, as well as the ship tour to the New Siberian Islands in  
6 the summer of 2002 and the expedition to the Oyogos Yar coast in summer 2007.  
7

8 **20**      **References**





- 1 Alekseev, M.N., Arkhangelov, A.A., Oolubeva, L.V., and Sulerzhitsky, L.D.: Paleocological correlation of the  
2 Quaternary events on the shelf and intracontinental areas of Eastern Siberia Geological - Paleocological situations  
3 for the Quaternary for the XIII Congress of INQUA, China, 1991 (in Russian), 1991a.
- 4 Alekseev, M.N., Arkhangelov, A.A., Ivanonova, N.M., Paty-kara, N.G., Plakht, I.V., Sekretov, S.B., and  
5 Shkarubo, S.I.: Laptev Sea and East-Siberian Cenozoic - Atlas of paleogeographic map of Eurasian shelf during  
6 the Mesozoic and Cenozoic. Volume 1 Moscow, Inst. of Geology, Russian Academy of Science: 1-20 (In Russian),  
7 1991b.
- 8 Alekseev, M.N., and Drushchits, V.A.: Climatic events of the Kazantsevo Interglacial and Holocene of the Eastern  
9 part of the Russian shelf and Siberia, *Bulletin of the Quaternary Commission*, 64, 78–88 (in Russian), 2001.
- 10 Aleksandrova, V.D.: The Arctic and Antarctic, their division into geobotanical areas. Cambridge University Press,  
11 pp 247, 1980.
- 12 Alfimov, A.V., Berman, D.I., and Sher, A.V.: Tundra-steppe insect assemblages and reconstruction of Late  
13 Pleistocene climate in the lower reaches of the Kolyma River, *Zoologicheskii Zhurnal*, 82(2), 281–300 (in  
14 Russian), 2003.
- 15 Allen, M.R., Dube, O.P., Solecki, W., Aragón-Durand, F., Cramer, W., Humphreys, S., Kainuma, M., Kala, J.,  
16 Mahowald, N., Mulugetta, Y., Perez, R., Wairiu, M., and Zickfeld, K.: Framing and Context. In: *Global Warming  
17 of 1.5°C. An IPCC Special Report on the impacts of global warming of 1.5°C above pre-industrial levels and  
18 related global greenhouse gas emission pathways, in the context of strengthening the global response to the threat  
19 of climate change, sustainable development, and efforts to eradicate poverty* [Masson-Delmotte, V., P. Zhai, H.-  
20 O. Pörtner, D. Roberts, J. Skea, P.R. Shukla, A. Pirani, W. Moufouma-Okia, C. Péan, R. Pidcock, S. Connors,  
21 J.B.R. Matthews, Y. Chen, X. Zhou, M.I. Gomis, E. Lonnoy, T. Maycock, M. Tignor, and T. Waterfield (eds.)].  
22 Cambridge University Press, Cambridge, UK and New York, NY, USA, 49-92,  
23 <https://doi.org/10.1017/9781009157940.003>, 2018.
- 24 Alsos, I.G., Lammers, Y., Yoccoz, N.G., Jørgensen, T., Sjögren, P., Gielly, L., and Edwards, M.E.: Plant DNA  
25 metabarcoding of lake sediments: How does it represent the contemporary vegetation, *PLOS One*, 13(4),  
26 e0195403, <https://doi.org/10.1371/journal.pone.0195403>, 2018.
- 27 Anderson, N.T., Kelson, J.R., Kele, S., Daëron, M., Bonifacie, M., Horita, J., Mackey, T.J., John, C.M., Kluge, T.,  
28 Petschnig, P., Jost, A B., Huntington, K.W., Bernasconi, S.M., and Bergmann, K.D.: A Unified Clumped Isotope  
29 Thermometer Calibration (0.5–1,100°C) Using Carbonate-Based Standardization, *Geophysical Research Letters*,  
30 48(7). <https://doi.org/10.1029/2020GL092069>, 2021.
- 31 Andreev, A.A., Schirrmeyer, L., Tarasov, P.E., Ganopolski, A., Brovkin, V., Siebert, C., and Hubberten, H.-W.:  
32 Vegetation and climate history in the Laptev Sea region (arctic Siberia) during Late Quaternary inferred from  
33 pollen records, *Quaternary Science Reviews*. 30, 2182–2199 <https://doi.org/10.1016/j.quascirev.2010.12.026>,  
34 2011.
- 35 Andreev, A., Grosse, G., Schirrmeyer, L., Kuznetsova, T. V., Kuzmina, S. A., Bobrov, A. A., Tarasov, P. E.,  
36 Novenko, E. Yu., Meyer, H., Derevyagin, A. Yu., Kienast, F., Bryantseva, A., and Kunitsky, V. V.: Weichselian  
37 and Holocene palaeoenvironmental history of the Bol'shoy Lyakhovsky Island, New Siberian Archipelago, Arctic  
38 Siberia., *Boreas* 38(1), 72–110., <https://doi.org/10.1111/j.1502-3885.2008.00039.x>, 2009.



- 1 Andreev, A.A., Grosse, G., Schirrmeyer, L., Kuzmina, S. A., Novenko, E.Yu., Bobrov, A.A., Tarasov, P.E.,  
2 Kuznetsova, T.V., Krbetschek, M., Meyer, H., and Kunitsky, V.V.: Late Saalian and Eemian palaeoenvironmental  
3 history of the Bol'shoy Lyakhovsky Island (Laptev Sea region, Arctic Siberia), *Boreas*, 33(4), 319–348.  
4 <https://doi.org/10.1111/j.1502-3885.2004.tb01244.x>, 2004.
- 5 Ashastina, K., Schirrmeyer, L., Fuchs, M., and Kienast, F.: Palaeoclimate characteristics in interior Siberia of  
6 MIS 6–2: first insights from the Batagay permafrost mega-thaw slump in the Yana Highlands, *Clim. Past*, 13, 795–  
7 818, <https://doi.org/10.5194/cp-13-795-2017>, 2017.
- 8 Artemov, I., and Egorova, A.: Locations of plants on dot distribution maps in the Flora of Siberia (Flora Sibiraea,  
9 1987–1997). Version 1.2. Central Siberian Botanical Garden SB RAS, Occurrence dataset  
10 <https://doi.org/10.15468/jb84wg> accessed via GBIF.org on 2023-04-21, 2021.
- 11 Atkinson, T.C., Briffa, K.R., and Coope, G.R.: Seasonal temperature in Britain during the past 22 000 years,  
12 reconstructed using beetle remains, *Nature*, 325, 587–592. <https://doi.org/10.1038/325587a0>, 1987.
- 13 Batrak, Y. and Müller, M.: On the warm bias in atmospheric reanalyses induced by the missing snow over Arctic  
14 sea-ice. *Nat Commun* 10, 4170, <https://doi.org/10.1038/s41467-019-11975-3>, 2019.
- 15 Berman, D., Alfimov, A., Kuzmina, S.: Invertebrates of the relict steppe ecosystems of Beringia, and the  
16 reconstruction of Pleistocene landscapes, *Quaternary Science Reviews* 30, 17-18, 2200–2219,  
17 <https://doi.org/10.1016/j.quascirev.2010.09.016>, 2011.
- 18 Bernasconi, S. M., Daëron, M., Bergmann, K. D., Bonifacie, M., Meckler, A. N., Affek, H. P., Anderson, N.,  
19 Bajnai, D., Dux, F., Eiler, J., ... Ziegler, M.: InterCarb: A Community Effort to Improve Interlaboratory  
20 Standardization of the Carbonate Clumped Isotope Thermometer Using Carbonate Standards, *Geochemistry,*  
21 *Geophysics, Geosystems*, 22(5). <https://doi.org/10.1029/2020GC009588>, 2021.
- 22 Bernasconi, S. M., Müller, I. A., Bergmann, K. D., Breitenbach, S. F. M., Fernandez, A., Hodell, D. A., Jaggi, M.,  
23 Meckler, A. N., Millan, I., and Ziegler, M.: Reducing Uncertainties in Carbonate Clumped Isotope Analysis  
24 Through Consistent Carbonate-Based Standardization, *Geochemistry, Geophysics, Geosystems*, 19(9), 2895–  
25 2914. <https://doi.org/10.1029/2017GC007385>, 2018.
- 26 Bledzki, L.A. and Rybak, J.I.: Freshwater Crustacean Zooplankton of Europe: Cladocera & Copepoda (Calanoida,  
27 Cyclopoida). Key to species identification, with notes on ecology, distribution, methods and introduction to data  
28 analysis, Springer International Publishing Switzerland, 918 pp., <https://doi.org/10.1007/978-3-319-29871-9>,  
29 2016.
- 30 Blott, S.J. and Pye, K.: GRADISTAT: a grain size distribution and statistics package for the analysis of  
31 unconsolidated sediments, *Earth Surf. Process. Landf.* 26, 1237-1248, <https://doi.org/10.1002/esp.261>, 2001.
- 32 Boike, J., Bolshiyonov, D. Yu., Schirrmeyer, L., Wetterich, S. (eds.): Russian-German Cooperation SYSTEM  
33 LAPTEV SEA: The Expedition Lena - New Siberian Islands 2007 during the International Polar Year (IPY)  
34 2007/2008, Reports on Polar and Marine Research, 584, 265 pp., [https://doi.org/10.2312/BzPM\\_0584\\_2008](https://doi.org/10.2312/BzPM_0584_2008), 2008.
- 35 Boike, J., Nitzbon, J., Anders, K., Grigoriev, M.N., Bolshiyonov, D.Y., Langer, M., Lange, S., Bornemann, N.,  
36 Morgenstern, A., Schreiber, P., Wille, C., Chadburn, S., Gouttevin, I., and Kutzbach, L.: Measurements in soil and  
37 air at Samoylov Station (2002-2018), version 201908. Alfred Wegener Institute,



- 1 <https://doi.org/10.1594/PANGAEA.905232>, 2019.
- 2 Bochkov, D.A. and Seregin, A.P.: Local floras of Russia: records from literature. Version 1.71. Lomonosov  
3 Moscow State University. Occurrence dataset <https://doi.org/10.15468/rxtjt2> accessed via GBIF.org on 2023-04-  
4 21, 2022.
- 5 Bøtter-Jensen, L., McKeever, S.W.S., and Wintle, A.G.: *Optically Stimulated Luminescence Dosimetry*. (1st  
6 edition) Elsevier Science, 374 pp., ISBN-13: 978-0444506849, 2003.
- 7 Bouchard, F., MacDonald, L.A., Turner, K.W., Thienpont, J.R., Medeiros, A.S., Biskaborn, B.K., Korosi, J., Hall,  
8 R.I., Pienitz, R., and Wolfe, B.B. Paleolimnology of thermokarst lakes: a window into permafrost landscape  
9 evolution. *Arctic Science*, 3(2): 91-117. <https://doi.org/10.1139/as-2016-0022>, 2017.
- 10 Brand, W.A., Assonov, S.S., and Coplen, T.B.: Correction for the 17O interference in  $\delta(13C)$  measurements when  
11 analyzing CO2 with stable isotope mass spectrometry (IUPAC Technical Report), *Pure and Applied Chemistry*,  
12 82(8), 1719–1733. <https://doi.org/10.1351/PAC-REP-09-01-05>, 2010.
- 13 Brooks, S.J., Langdon, P.G., and Heiri, O.: The Identification and Use of Palaeartic Chironomidae Larvae in  
14 Palaeoecology, QRA Technical Guide No. 10, *Journal of Paleolimnology*, 40(2), 751–753,  
15 <https://doi.org/10.1007/s10933-007-9191-1>, 2008.
- 16 Buckland, P.: The Bugs Coleopteran Ecology Package (BugsCEP) database: 1000 sites and half a million fossils  
17 later, *Quaternary International*, 341, 272–282, <https://doi.org/10.1016/j.quaint.2014.01.030>, 2014.
- 18 Buckland, P.: The development and implementation of software for palaeoenvironmental and palaeoclimatological  
19 research: the Bugs Coleopteran Ecology Package (BugsCEP) [Internet] [PhD dissertation]. [Umeå]: Arkeologi  
20 och samiska studier; (Archaeology and environment). Available from:  
21 <http://urn.kb.se/resolve?urn=urn:nbn:se:umu:diva-1105>, 2007.
- 22 Cao, X., Herzschuh, U., Telford, R. J., and Ni, J.: A modern pollen–climate dataset from China and Mongolia:  
23 Assessing its potential for climate reconstruction, *Review of Palaeobotany and Palynology*, 211, 87–96,  
24 <https://doi.org/10.1016/j.revpalbo.2014.08.007>, 2014.
- 25 CAPE-LIG Project Members: LIG Arctic warmth confirms polar amplification of climate change, *Quaternary*  
26 *Science Reviews*, 25, 1383-1400, <https://doi.org/10.1016/j.quascirev.2006.01.033>, 2006.
- 27 Capron, E., Govin, A., Stone, E.J., Masson-Delmotte, V., Mulitza, S., Otto-Bliesner, B., Rasmussen, T.L., Sime,  
28 L.C., Waelbroeck, C., and Wolff, E. W.: Temporal and spatial structure of multi-millennial temperature changes  
29 at high latitudes during the LIG, *Quaternary Science Reviews*, 103, 116-133,  
30 <https://doi.org/10.1016/j.quascirev.2014.08.018>, 2014.
- 31 Carter, M. R. and E. G. Gregorich (eds.): *Soil Sampling and Methods of Analysis*, 2nd ed., 1224 pp., Taylor and  
32 Francis, London, 2008.
- 33 CAVM Team: *Circumpolar Arctic Vegetation Map*. (1:7,500,000 scale), Conservation of Arctic Flora and Fauna  
34 (CAFF) Map No. 1. U.S. Fish and Wildlife Service, Anchorage, Alaska, 2003.
- 35 Chernov, Y.I. and Makarova, O.L.: Beetles (Coleoptera) in High Arctic. L. Penev, T. Erwin, and T. Assmann  
36 (Eds.) *Back to the Roots and Back to the Future. Towards a New Synthesis amongst Taxonomic, Ecological and*  
37 *Biogeographical Approaches in Carabidology*. Proceedings of the XIII European Carabidologists Meeting,



- 1 Blagoevgrad, August 20-24, 2007, pp. 207–240, 2008.
- 2 Clarke, C.L., Alsos, I.G., Edwards, M.E., Paus, A., Gielly, L., Hafliadason, H., Mangerud, J., Regnéll, C., Hughes,  
3 P.D.M., Svendsen, J.I., and Bjune, A.E.: A 24,000-year ancient DNA and pollen record from the Polar Urals  
4 reveals temporal dynamics of arctic and boreal plant communities, *Quaternary Science Reviews*, 247, 106564,  
5 <https://doi.org/10.1016/j.quascirev.2020.106564>, 2020.
- 6 Coplen, T.B.: Calibration of the calcite–water oxygen-isotope geothermometer at Devils Hole, Nevada, a natural  
7 laboratory. *Geochimica et Cosmochimica Acta*, 71(16), 3948–3957, <https://doi.org/10.1016/j.gca.2007.05.028>,  
8 2007.
- 9 Courtin, J., Perfumo, A., Andreev, A.A., Opel, T., Stoof-Leichsenring, K.R., Edwards, M.E., Murton, J.B., and  
10 Herzschuh, U.: Pleistocene glacial and interglacial ecosystems inferred from ancient DNA analyses of permafrost  
11 sediments from Batagay megaslump, East Siberia, *Environmental DNA*, 4 (6), 1199-1433,  
12 <https://doi.org/10.1002/edn3.336>, 2022.
- 13 Crump, S. E., Fréchette, B., Power, M., Cutler, S., de Wet, G., Raynolds, M. K., Raberg, J. H., Briner, J. P.,  
14 Thomas, E. K., Sepúlveda, J., Shapiro, B., Bunce, M., and Miller, G. H.: Ancient plant DNA reveals High Arctic  
15 greening during the LIG, *Proceedings of the National Academy of Sciences*, 118, e2019069118,  
16 <https://doi.org/10.1073/pnas.2019069118>, 2021.
- 17 Czudek, T. and Demek, J.: Thermokarst in Siberia and Its Influence on the Development of Lowland Relief,  
18 *Quaternary Research* 1, 103–120, [https://doi.org/10.1016/0033-5894\(70\)90013-X](https://doi.org/10.1016/0033-5894(70)90013-X), 1970.
- 19 Daëron, M., Blamart, D., Peral, M., and Affek, H.P.: Absolute isotopic abundance ratios and the accuracy of  $\Delta 47$   
20 measurements, *Chemical Geology*, 442, 83–96, <https://doi.org/10.1016/j.chemgeo.2016.08.014>, 2016.
- 21 Decrouy, L., Vennemann, T.W., and Ariztegui, D.: Sediment penetration depths of epi- and infaunal ostracods  
22 from Lake Geneva (Switzerland). *Hydrobiologia*, 688(1), 5–23, <https://doi.org/10.1007/s10750-010-0561-8>, 2012.
- 23 De Jonge, C., Guo, J., Hällberg, P., Griepentrog, M., Rifai, H., Richter, A., Ramirez, E., Zhang, X., Smittenberg,  
24 R.H., Peterse, F., Boeckx, P., and Dercon, G.: The impact of soil chemistry, moisture and temperature on branched  
25 and isoprenoid GDGTs in soils: A study using six globally distributed elevation transects, *Organic Geochemistry*  
26 187, 104706, <https://doi.org/10.1016/j.orggeochem.2023.104706>, 2024.
- 27 Dennis, K.J., Affek, H.P., Passey, B.H., Schrag, D.P., and Eiler, J.M.: Defining an absolute reference frame for  
28 ‘clumped’ isotope studies of CO<sub>2</sub>, *Geochimica et Cosmochimica Acta*, 75(22), 7117–7131,  
29 <https://doi.org/10.1016/j.gca.2011.09.025>, 2011.
- 30 Durcan, J.A., King, G.E., and Duller, G.A.T.: DRAC: Dose rate and age calculator for trapped charge dating,  
31 *Quaternary Geochronology*, 28, 54-61, <https://doi.org/10.1016/j.quageo.2015.03.012>, 2015.
- 32 Edwards, M.E., Brubaker, L.B., Lozhkin, A.V., and Anderson, P.M.: Structurally Novel Biomes: A Response to  
33 Past Warming in Beringia, *Ecology*, 86, 1696–1703, <https://doi.org/10.1890/03-0787>, 2005.
- 34 Edwards, M.E., Hamilton, T.D., Elias, S.A., Bigelow, N.H., and Krumhardt, A.P.: Interglacial Extension of the  
35 Boreal Forest Limit in the Noatak Valley, Northwest Alaska: Evidence from an Exhumed River-Cut Bluff and  
36 Debris Apron, *Arctic Antarctic and Alpine Research*, 35(4), 460–68, [https://doi.org/10.1657/1523-0430\(2003\)035\[0460:IEOTBF\]2.0.CO;2](https://doi.org/10.1657/1523-0430(2003)035[0460:IEOTBF]2.0.CO;2), 2003.
- 37



- 1 Eiler, J.M.: “Clumped-isotope” geochemistry - the study of naturally-occurring, multiply-substituted  
2 isotopologues. *Earth and Planetary Science Letters*, 262(3–4), 309–327,  
3 <https://doi.org/10.1016/j.epsl.2007.08.020>, 2007.
- 4 Eiler, J.M. and Schauble, E.:  $^{18}\text{O}^{13}\text{C}^{16}\text{O}$  in Earth’s atmosphere, *Geochimica et Cosmochimica Acta*, 68(23), 4767–  
5 4777, <https://doi.org/10.1016/j.gca.2004.05.035>, 2004.
- 6 Elias, S.A.: Mutual climatic range reconstructions of seasonal temperatures based on late Pleistocene fossil beetle  
7 assemblages in Eastern Beringia, *Quaternary Science Reviews*, 20, 77–91, <https://doi.org/10.1016/S0277->  
8 [3791\(00\)00130-X](https://doi.org/10.1016/S0277-3791(00)00130-X), 2001.
- 9 Elias, S.A.: Climatic tolerances and zoogeography of the late Pleistocene beetle fauna of Beringia. *Géographie*  
10 *physique et Quaternaire*, 54(2), 143–155, <https://doi.org/10.7202/004813ar>, 2000.
- 11 Farquharson, L., Walter Anthony, K.M., Bigelow, N.H., Edwards, M.E., and Grosse, G.: Facies analysis of yedoma  
12 thermokarst lakes on the northern Seward Peninsula, Alaska. *Sedimentary Geology*, 340, 25-37.  
13 <https://doi.org/10.1016/j.sedgeo.2016.01.002>, 2016.
- 14 Fick, S.E. and Hijmans, R.J.: WorldClim 2: new 1-km spatial resolution climate surfaces for global land areas, *Int.*  
15 *J. Climatol.*, 37, 4302–4315, <https://doi.org/10.1002/joc.5086>, 2017.
- 16 Froese, D., Zazula, G., Westgate, J., Preece, S., Sanborn, P. A., Reyes, A., and Pearce, N.: The Klondike goldfields  
17 and Pleistocene environments of Beringia, *GSA Today*, 19, 4-10, <https://doi.org/10.1130/GSATG54A.1>, 2009.
- 18 Frolova L., Nazarova L., Pestryakova L., Herzs Schuh U.: Subfossil cladoceran remains from sediment in  
19 thermokarst lakes in northeastern Siberia, Russia, *Journal of Paleolimnology*, 52(1), 107-119,  
20 <https://doi.org/10.1007/s10933-014-9781-7>, 2014
- 21 Galbraith, R.F., Roberts, R.G., Laslett, G. M., Yoshida, H., and Olley, J. M.: Optical dating of single and multiple  
22 grains of quartz from Jinnium rock shelter, northern Australia: part I, experimental design and statistical models,  
23 *Archaeometry* 41(2), 339–364, <https://doi.org/10.1111/j.1475-4754.1999.tb00987.x>, 1999.
- 24 GBIF: The Global Biodiversity Information Facility: GBIF Home Page, <https://www.gbif.org>, Assessed 2023-04-  
25 21, 2023.
- 26 Grosse, G., Jones, B., and Arp, C.: Thermokarst Lakes, Drainage, and Drained Basins. In: Shroder JF (ed.): *Treatise*  
27 *on Geomorphology*, Vol. 8, 325-353. San Diego: Academic Press. <https://doi.org/10.1016/B978-0-12-374739->  
28 [6.00216-5](https://doi.org/10.1016/B978-0-12-374739-6.00216-5), 2013.
- 29 Guarino, M.-V., Sime, L. C., Schröder, D., Malmierca-Vallet, I., Rosenblum, E., Ringer, M., Ridley, J., Feltham,  
30 D., Bitz, C., Steig, E. J., Wolff, E., Stroeve, J., and Sellar, A.: Sea-ice-free Arctic during the LIG supports fast  
31 future loss, *Nat Clim Change*, 10, 928-932, <https://doi.org/10.1038/s41558-020-0865-2>, 2020.
- 32 Günther, F., Overduin, P.P., Sandakov, A.V., Grosse, G., and Grigoriev, M.N.: Short- and long-term thermo-  
33 erosion of ice-rich permafrost coasts in the Laptev Sea region, *Biogeosciences*, 10, 4297–4318,  
34 <https://doi.org/10.5194/bg-10-4297-2013>, 2013.
- 35 Halfman, R., Lembrechts, J., Radujković, D., Gruyter, J.D., Nijs, I., and de Jonge, C.: Soil chemistry, temperature  
36 and bacterial community composition drive brGDGT distributions along a subarctic elevation gradient. *Organic*  
37 *Geochemistry*, 163, 104346, <https://doi.org/10.1016/j.orggeochem.2021.104346>, 2021.



- 1 Halamka, T.A., McFarlin, J.M., Younkin, A.D., Depoy, J., Dildar, N., and Kopf, S.H.: Oxygen limitation can  
2 trigger the production of branched GDGTs in culture. *Geochemical Perspectives Letters* 36–  
3 39, <https://doi.org/10.7185/geochemlet.2132>, 2021.
- 4 Halamka, T.A., Raberg, J.H., McFarlin, J.M., Younkin, A.D., Mulligan, C., Liu, X., and Kopf, S.H.: Production  
5 of diverse brGDGTs by *Acidobacterium Solibacter usitatus* in response to temperature, pH, and O<sub>2</sub> provides a  
6 culturing perspective on brGDGT proxies and biosynthesis, *Geobiology*, 21, 102–118,  
7 <https://doi.org/10.1111/gbi.12525>, 2023.
- 8 Hamilton, T.D. and Brigham-Grette, J.: The last interglaciation in Alaska: Stratigraphy and paleoecology of  
9 potential sites. *Quaternary International*, 10–12, 49–71, [https://doi.org/10.1016/1040-6182\(91\)90040-U](https://doi.org/10.1016/1040-6182(91)90040-U), 1991.
- 10 Hersbach, H., Bell, B., Berrisford, P., Hirahara, S., et al.: The ERA5 global reanalysis, *Q.J.R. Meteorol. Soc.*, 146,  
11 1999–2049, <https://doi.org/10.1002/qj.3803>, 2020.
- 12 Herzschuh, U., Li, C., Böhmer, T., Postl, A. K., Heim, B., Andreev, A. A., Cao, X., Wiczorek, M., and Ni, J.:  
13 LegacyPollen 1.0: a taxonomically harmonized global late Quaternary pollen dataset of 2831 records with  
14 standardized chronologies, *Earth Syst. Sci. Data*, 14, 3213–3227, <https://doi.org/10.5194/essd-14-3213-2022>,  
15 2022.
- 16 Herzschuh, U., Böhmer, T., Li, C., Chevalier, M., Hébert, R., Dallmeyer, A., Cao, X., Bigelow, N. H., Nazarova,  
17 L., Novenko, E. Y., Park, J., Peyron, O., Rudaya, N. A., Schlütz, F., Shumilovskikh, L. S., Tarasov, P. E., Wang,  
18 Y., Wen, R., Xu, Q., and Zheng, Z.: LegacyClimate 1.0: a dataset of pollen-based climate reconstructions from  
19 2594 Northern Hemisphere sites covering the last 30 kyr and beyond, *Earth Syst. Sci. Data*, 15, 2235–2258,  
20 <https://doi.org/10.5194/essd-15-2235-2023>, 2023.
- 21 Hopmans, E.C., Weijers, J.W.H., Schefuß, E., Herfort, L., Sinninghe Damsté, J.S. and Schouten, S.: A novel proxy  
22 for terrestrial organic matter in sediments based on branched and isoprenoid tetraether lipids, *Earth and Planetary  
23 Science Letters*, 224, 107–116, <https://doi.org/10.1016/j.epsl.2004.05.012>, 2004.
- 24 Huang, B., Yin, X., Menne, M.J., Vose, R., and Zhang, H.: NOAA Global Surface Temperature Dataset  
25 (NOAAGlobalTemp), Version 6.0.0. NOAA National Centers for Environmental Information.  
26 <https://doi.org/10.25921/rzxcg-p717>, 2024.
- 27 Huntley, D.J. and Baril, M.R.: The K content of the K-feldspars being measured in optical dating or in  
28 thermoluminescence dating, *Ancient TL* 15(1), 11–13, URL: [http://ancienttl.org/ATL\\_15-1\\_1997/ATL\\_15-1\\_Huntley\\_p11-13.pdf](http://ancienttl.org/ATL_15-1_1997/ATL_15-1_Huntley_p11-13.pdf), 1997.
- 30 Ilyashuk, B.P., Andreev, A.A., Bobrov, A.A., Tums koy, V.E., Ilyashuk, E.A.: Interglacial history of a palaeo-lake  
31 and regional environment: a multi-proxy study of a permafrost deposit from Bol'shoi Lyakhovsky Island, Arctic  
32 Siberia, *Journal of Paleolimnology*, 36, 855–872, <https://doi.org/10.1007/s10933-005-5859-6>, 2006.
- 33 iNaturalist: Observations of *Alnus hirsuta*, <https://www.inaturalist.org/taxa/437257-Alnus-hirsuta>. Accessed  
34 2023-03-28, 2023.
- 35 Ivanenko, G.V.: State geological map of Russian Federation, New Siberian Islands, 1:1,00,000, map of Quaternary  
36 formations, Ministry of Natural Resources of Russian Federation, 1998.
- 37 Jensen, B.J.L., Reyes, A.V., Froese, D.G., Stone, D.B.: The Palisades is a key reference site for the middle



- 1 Pleistocene of eastern Beringia: new evidence from paleomagnetism and regional tephrostratigraphy. *Quaternary*  
2 *Science Reviews*, 63, 91-108, <https://doi.org/10.1016/j.quascirev.2012.11.035>, 2013.
- 3 John, C.M. and Bowen, D.: Community software for challenging isotope analysis: First applications of ‘Easotope’  
4 to clumped isotopes, *Rapid Communications in Mass Spectrometry*, 30(21), 2285–2300,  
5 <https://doi.org/10.1002/rcm.7720>, 2016.
- 6 Jones, M.C., Grosse, G., Treat, C., Tuetsky, M., Walter Anthony, K., and Brosius, L.: Past permafrost dynamics  
7 can inform future permafrost carbon-climate feedbacks. *Commun Earth Environ* 4, 272,  
8 <https://doi.org/10.1038/s43247-023-00886-3>, 2023.
- 9 Jones, B.M., Grosse, G., Farquharson, L.M. Roy-Leville, P., Veremeeva, A., Kanevskiy, M.Z., Gaglioti, B.V.,  
10 Breen, A.L., Parsekian, A.D., Ulrich, M., and Hinkel, K.M.: Lake and drained lake basin systems in lowland  
11 permafrost regions. *Nat Rev Earth Environ* 3, 85–98, <https://doi.org/10.1038/s43017-021-00238-9>, 2022.
- 12 Jørgensen, T., Haile, J., Möller, P., Andreev, A., Boessenkool, S., Rasmussen, M., Kienast, F., Coissac, E.,  
13 Taberlet, P., Brochmann, C., Bigelow, N.H., Andersen, K., Orlando, L., Gilbert, M.T.P., and Willerslev, E.: A  
14 comparative study of ancient sedimentary DNA, pollen and macrofossils from permafrost sediments of northern  
15 Siberia reveals long-term vegetational stability, *Molecular Ecology*, 21, 1989–2003.  
16 <https://doi.org/10.1111/j.1365-294X.2011.05287.x>, 2012.
- 17 Juggins, S.: C2 Version 1.5 User guide. Software for ecological and palaeoecological data analysis and  
18 visualization. Newcastle University, Newcastle upon Tyne, UK, 2007.
- 19 Juggins, S.: rioja: Analysis of Quaternary Science Data, R package version 0.9-21, [https://cran.r-](https://cran.r-project.org/web/packages/rioja)  
20 [project.org/web/packages/rioja](https://cran.r-project.org/web/packages/rioja), assessed 2021-11-22, 2019.
- 21 Kageyama, M., Sime, L. C., Sicard, M., Guarino, M.-V., de Vernal, A., Stein, R., Schroeder, D., Malmierca-Vallet,  
22 I., Abe-Ouchi, A., Bitz, C., Braconnot, P., Brady, E.C., Cao, J., Chamberlain, M. A., Feltham, D., Guo, C.,  
23 LeGrande, A.N., Lohmann, G., Meissner, K. J., Menviel, L., Morozova, P., Nisancioglu, K. H., Otto-Bliesner,  
24 B.L., O’ishi, R., Ramos Buarque, S., Salas y Melia, D., Sherriff-Tadano, S., Stroeve, J., Shi, X., Sun, B., Tomas,  
25 R.A., Volodin, E., Yeung, N.K.H., Zhang, Q., Zhang, Z., Zheng, W., and Ziehn, T.: A multi-model CMIP6-PMIP4  
26 study of Arctic sea ice at 127 ka: sea ice data compilation and model differences, *Clim. Past*, 17, 37–62,  
27 <https://doi.org/10.5194/cp-17-37-2021>, 2021.
- 28 Kageyama, M., Braconnot, P., Harrison, S.P., Haywood, A.M., Jungclaus, J., Otto-Bliesner, B.L., ... & Zhou, T.:  
29 PMIP4-CMIP6: the contribution of the Paleoclimate Modelling Intercomparison Project to CMIP6. *Geoscientific*  
30 *Model Development Discussions*, 11(3), 1033-1057. <https://doi.org/10.5194/gmd-11-1033-2018>, 2018.
- 31 Kallistova, A., Savvichev, A., Rusanov, I., and Pimenov, N.: Thermokarst Lakes, Ecosystems with Intense  
32 Microbial Processes of the Methane Cycle, *Microbiology*, 88, 649-661,  
33 <https://doi.org/10.1134/S0026261719060043>, 2019.
- 34 Kaplina, T.N.: Ancient alas complexes of northern Yakutia (Part 1), *Kriosfera Zemli* 15, 2, 3–13 (in Russian),  
35 2011a.
- 36 Kaplina, T.N.: Ancient alas complexes of northern Yakutia (Part 2), *Kriosfera Zemli* 15, 3, 20–30 (in Russian),  
37 2011b.





- 1 Kaplina T.N.: History of permafrost strata of northern Yakutia in the Late Cenozoic. In: History of the development  
2 of permafrost deposits of Eurasia. Moscow: Nauka, 153–181 (in Russian), 1981.
- 3 Kaplina, T.N., Sher, A.V., Giterman, R.E., Zazhigin, V.S., Kiselev, S.V., Lozhkin, A.V., and Nikitin, V.P.: Key  
4 section of Pleistocene deposits on the Allaikha river (lower reaches of the Indigirka). In: Bulletin of Commission  
5 on Quaternary Period research, USSR Academy of Sciences, 50, 73–95 (in Russian), 1980.
- 6 Kienast, F.: Plant macrofossil records – Arctic Eurasia, In: Encyclopedia of Quaternary Science. Elias, Scott A.,  
7 Mock, Cary (Editors-in-Chief), Elsevier, 2nd Edition Vol. 3, 733–745, <https://doi.org/10.1016/B978-0-444-53643-3.00213-2>, 2013.
- 9 Kienast, F., Wetterich, S., Kuzmina, S., Schirrmeister, L., Andreev, A., Tarasov, P., Nazarova, L., Kossler, A.,  
10 Frolova, A., and Kunitsky, V.V.: Paleontological records indicate the occurrence of open woodlands in a dry inland  
11 climate at the present-day Arctic coast in western Beringia during the LIG, Quaternary Science Reviews, 30, 2134–  
12 2159, <https://doi.org/10.1016/j.quascirev.2010.11.024>, 2011.
- 13 Kienast, F., Tarasov, P., Schirrmeister, L., Grosse, G., and Andreev, A.A.: Continental climate in the East Siberian  
14 Arctic during the LIG: implications from palaeobotanical records, Global and Planetary Change, 60(3/4), 535–  
15 562. <https://doi.org/10.1016/j.gloplacha.2007.07.004>, 2008.
- 16 Kjær, K.H., Winther Pedersen, M., De Sanctis, B., De Cahsan, B., Korneliussen, T.S., Michelsen, C.S., Sand,  
17 K.K., Jelavić, S., Ruter, A.H., Schmidt, A.M.A., Kjeldsen, K.K., Tesakov, A.S., Snowball, I., Gosse, J.C., Alsos,  
18 I.G., Wang, Y., Dockter, C., Rasmussen, M., Jørgensen, M.E., ... and Willerslev, E.: A 2-million-year-old  
19 ecosystem in Greenland uncovered by environmental DNA, Nature, 612, 7939. [https://doi.org/10.1038/s41586-](https://doi.org/10.1038/s41586-022-05453-y)  
20 [022-05453-y](https://doi.org/10.1038/s41586-022-05453-y), 2022.
- 21 Klemm, J., Herzs Schuh, U., Pisaric, M.F.J., Telford, R.J., Heim, B., and Pestryakova, L.A.: A pollen-climate  
22 transfer function from the tundra and taiga vegetation in Arctic Siberia and its applicability to a Holocene record,  
23 Palaeogeography, Palaeoclimatology, Palaeoecology, 386, 702–713, <https://doi.org/10.1016/j.palaeo.2013.06.033>,  
24 2013.
- 25 Krasnoborov, I.M. and Malyshev, L.I. (eds.): Flora of Siberia Vol. 5., Salicaceae - Amaranthaceae. Enfield (NH),  
26 USA: Science Publishers, Inc., 305 pp., ISBN: 9781578081042, 2003.
- 27 Krbetschek, M.R., Götze, I., Dietrich, A., and Trautmann, T.: Spectral information from minerals relevant for  
28 luminescence dating, Radiation Measurements, 27(5-6), 695–748, [https://doi.org/10.1016/S1350-4487\(97\)00223-](https://doi.org/10.1016/S1350-4487(97)00223-0)  
29 [0](https://doi.org/10.1016/S1350-4487(97)00223-0), 1997.
- 30 Kreutzer, S., Schmidt, C., Fuchs, M., Dietze, M., Fischer, M., and Fuchs, M.; Introducing an R package for  
31 luminescence dating analysis. Ancient TL 3, 1–8, 2012.
- 32 Kusch, S., Winterfeld, M., Mollenhauer, G., Höfle, S.T., Schirrmeister, L., Schwamborn, G., Rethemeyer, J.:  
33 Glycerol dialkyl glycerol tetraethers (GDGTs) in high latitude Siberian permafrost: Diversity, environmental  
34 controls, and implications for proxy applications, Organic Geochemistry, 136, 103888,  
35 <https://doi.org/10.1016/j.orggeochem.2019.06.009>, 2019.
- 36 Kuzmina, S.A.: Quaternary Insects and Environment of the Northeastern Asia, Paleontological Journal, 49, 7, 679–  
37 867, <https://doi.org/10.1134/S0031030115070011>, 2015a.



- 1 Kuzmina, S.: Insect faunal response to environmental changes during the LIG in Western Beringia. *Quaternary*  
2 *International*, 379, 106–117, <https://doi.org/10.1016/j.quaint.2015.04.036>, 2015b.
- 3 Kuznetsova, T.V., Wetterich, S., Matthes, H., Tumskey, V.E., and Schirrneister, L.: Mammoth fauna remains  
4 from late Pleistocene deposits of the Dmitry Laptev Strait south coast (northern Yakutia, Russia), *Frontiers in*  
5 *Earth Science*, 10, 757629. <https://doi.org/10.3389/feart.2022.757629>, 2022.
- 6 Leemans, R. and Cramer, W.: The IIASA Climate Database for Mean Monthly Values of Temperature,  
7 Precipitation and Cloudiness on A Global Terrestrial Grid. International Institute of Applied Systems Analysis,  
8 Luxemburg (updated version), [https://daac.ornl.gov/CLIMATE/guides/cramer\\_leemans.html](https://daac.ornl.gov/CLIMATE/guides/cramer_leemans.html), 1991.
- 9 Lenz, J., Jones, B.M., Wetterich, S., Tjallingii, R., Fritz, M., Arp, C.D., Rudaya, N., and Grosse, G.: Impacts of  
10 shore expansion and catchment characteristics on lacustrine thermokarst records in permafrost lowlands, Alaska  
11 Arctic Coastal Plain. *arktos*, 2, 25, <https://doi.org/10.1007/s41063-016-0025-0>, 2016.
- 12 Lisiecki, L.E. and Raymo, M.E.: A Pliocene–Pleistocene stack of 57 globally distributed benthic  $\delta^{18}\text{O}$  records,  
13 *Paleoceanography*, 20, PA1003. <https://doi.org/10.1029/2004PA001071>, 2005.
- 14 Luoto, T.P., Nevalainen, L., Kubischta, F., Kultti, S., Knudsen, K.L. and Salonen, V.-P.: Late Quaternary  
15 ecological turnover in high arctic Lake Einstaken, Nordaustlandet, Svalbard (80° N). *Geografiska Annaler: Series*  
16 *A, Physical Geography*, 93, 337–354, <https://doi.org/10.1111/j.1468-0459.2011.00435.x>, 2011
- 17 Marchegiano, M., Peral, M., Venderickx, J., Martens, K., García-Alix, A., Snoeck, C., Goderis, S., and Claeys, P.:  
18 The Ostracod Clumped-Isotope Thermometer: A Novel Tool to Accurately Quantify Continental Climate  
19 Changes, *Geophysical Research Letters*, 51(4), e2023GL107426. <https://doi.org/10.1029/2023GL107426>, 2024.
- 20 Maraun, D. and Widmann, M.: Statistical downscaling and bias correction for climate research, Cambridge  
21 University Press, Cambridge, UK, <https://doi.org/10.1017/9781107588783>, 2018.
- 22 Massaferrro, J. and Brooks, S.J.: Response of chironomids to Late Quaternary environmental change in the Taitao  
23 Peninsula, southern Chile, *Journal of Quaternary Science*, 17, 101–111, <https://doi.org/10.1002/jqs.671>, 2002.
- 24 McMahon, R.F. and Bogan, A.E.: 11 - MOLLUSCA: BIVALVA. In: Thorp, J.H. and Covich, A.P. (eds.) *Ecology*  
25 *and Classification of North American Freshwater Invertebrates*, 2nd Edition, Academy Press, 331–429,  
26 <https://doi.org/10.1016/B978-012690647-9/50012-0>, 2001.
- 27 Meisch, C.: *Freshwater Ostracoda of Western and Central Europe*, Heidelberg, Berlin: Spektrum Akademischer  
28 Verlag, pp. 555, 2000.
- 29 Moller Pillot, H.K.M.: *Chironomidae Larvae, Volume 2: Biology and ecology of the Chironomini*, 270 pp. KNNV  
30 Publishing, <https://doi.org/10.1163/9789004278042>, 2009.
- 31 Morgenstern, A., Ulrich, M., Günther, F., Roessler, S., Fedorova, I.V., Rudaya, N.A., Wetterich, S., Boike, J. and  
32 Schirrneister, L.: Evolution of thermokarst in East Siberian ice-rich permafrost: A case study, *Geomorphology*,  
33 201, 363–379, <https://doi.org/10.1016/j.geomorph.2013.07.011>, 2013.
- 34 Murray, A.S. and Wintle, A.G.: Luminescence dating of quartz using an improved single-aliquot regenerative-  
35 dose protocol, *Radiation Measurements*, 32(1), 57–73, [https://doi.org/10.1016/S1350-4487\(99\)00253-X](https://doi.org/10.1016/S1350-4487(99)00253-X), 2000.



- 1 Murray, A.S. and Wintle, A.G.: The single aliquot regenerative dose protocol: potential for improvements in  
2 reliability, *Radiation Measurements*, 37(4-5), 377–381, [https://doi.org/10.1016/S1350-4487\(03\)00053-2](https://doi.org/10.1016/S1350-4487(03)00053-2), 2003,
- 3 Murton, J.B., Opel, T., Toms, P., Blinov, A., Fuchs, M., Wood, J., Gärtner, A., Merchel, S., Rugel, G., Savvinov,  
4 G., and Wetterich, S.: A multimethod dating study of ancient permafrost, Batagay megaslump, east Siberia,  
5 *Quaternary Research*, 105, 1–22, <https://doi.org/10.1017/qua.2021.27>, 2022.
- 6 Murton, J.B.: Thermokarst-lake-basin sediments, Tuktoyaktuk Coastlands, western arctic Canada. *Sedimentology*,  
7 43, 737-760, <https://doi.org/10.1111/j.1365-3091.1996.tb02023.x>, 1996.
- 8 Nazarova, L., Syrykh, L., Grekov, I., Sapelko, T., Krashennikov, A.B., and Solovieva, N.: Chironomid-based  
9 modern summer temperature data set and inference model for the Northwest European part of Russia, *Water*, 15,  
10 976, <https://doi.org/10.3390/w15050976>, 2023.
- 11 Nazarova, L.B., Self, A.E., Brooks, S.J., Solovieva, N., Syrykh, L.S., and Dauvalter, V.A.: Chironomid fauna of  
12 the lakes from the Pechora River Basin (East of European part of Russian Arctic): Ecology and reconstruction of  
13 recent ecological changes in the region, *Contemporary Problems of Ecology*, 10, 350–362,  
14 <https://doi.org/10.1134/S1995425517040059>, 2017a.
- 15 Nazarova L., Bleibtreu A., Hoff U., Dirksen V., and Diekmann B.: Changes in temperature and water depth of a  
16 small mountain lake during the past 3000 years in Central Kamchatka reflected by chironomid record, *Quaternary*  
17 *International*, 447, 46–58, <https://doi.org/10.1016/j.quaint.2016.10.008>, 2017b.
- 18 Nazarova L., Self A., Brooks S.J., van Hardenbroek M., Herzsuh U., and Diekmann B.: Northern Russian  
19 chironomid-based modern summer temperature data set and inference models, *Global and Planetary Change*, 134,  
20 10–25, <https://doi.org/10.1016/j.gloplacha.2014.11.015>, 2015.
- 21 Nazarova L., Herzsuh U., Wetterich S., Kumke T., and Pestjakova L.: Chironomid-based inference models for  
22 estimating mean July air temperature and water depth from lakes in Yakutia, northeastern Russia, *Journal of*  
23 *Palaeolimnology*. 45, 57–71, <https://doi.org/10.1007/s10933-010-9479-4>, 2011.
- 24 Nazarova, L., Pstryakova, L.A., Ushnitskaya, L.A., and Hubberten, H.-W.: Chironomids (Diptera: Chironomidae)  
25 in lakes of central Yakutia and their indicative potential for paleoclimatic research, *Contemporary problems of*  
26 *ecology*, 1, 335–345 <https://doi.org/10.1134/S1995425508030089>, 2008.
- 27 Niemeyer, B., Klemm, J., Pstryakova, L.A., and Herzsuh, U.: Relative pollen productivity estimates for  
28 common taxa of the northern Siberian Arctic, *Rev. Palaeobot. Palynol.*, 221, 71–82,  
29 <https://doi.org/10.1016/j.revpalbo.2015.06.008>, 2015.
- 30 Niemeyer, B., Epp, L.S., Stoof-Leichsenring, K.R., Pstryakova, L.A., and Herzsuh, U.: A comparison of  
31 sedimentary DNA and pollen from lake sediments in recording vegetation composition at the Siberian treeline,  
32 *Mol Ecol Resour.*, 17, e46–e62. <https://doi.org/10.1111/1755-0998.12689>, 2017.
- 33 Niemeyer, B., Klemm, J., Herzsuh, U., and Pstryakova, L.: Relative pollen productivity estimates for common  
34 taxa of the northern Siberian Arctic, *Review of Palaeobotany and Palynology*, 221, 71-82,  
35 <https://doi.org/10.1016/j.revpalbo.2015.06.008>, 2015.
- 36 Nikolskiy P.A., Basilyan A.E., and Zazhigin V.S.: New Data on the Age of the Glaciation in the New Siberian  
37 Islands (Russian Eastern Arctic), *Doklady Earth Sciences*, 475(1), 748–752,,  
38 <https://doi.org/10.1134/S1028334X17070194>, 2017.



- 1 Opel, T., Bertran, P., Grosse, G., Jones, M., Luetscher, M., Schirrmeister, L., Stadelmaier, K. H., and Veremeeva,  
2 A.: Ancient permafrost and past permafrost in the Northern Hemisphere, in: Reference Module in Earth Systems  
3 and Environmental Sciences, Elsevier, <https://doi.org/10.1016/B978-0-323-99931-1.00258-0>, 2024.
- 4 Opel, T., Wetterich, S., Meyer, H., Dereviagin, A. Yu., Fuchs, M. C., and Schirrmeister, L.: Ground-ice stable isotopes  
5 and cryostratigraphy reflect late Quaternary palaeoclimate in the Northeast Siberian Arctic (Oyogos Yar coast,  
6 Dmitry Laptev Strait), *Clim Past*, 13, 587–611, <https://doi.org/10.5194/cp-13-587-2017>, 2017.
- 7 Opel, T., Dereviagin, A. Y., Meyer, H., Schirrmeister, L., and Wetterich, S.: Palaeoclimatic information from  
8 stable water isotopes of Holocene ice wedges on the Dmitrii Laptev Strait, northeast Siberia, Russia, *Permafrost  
9 and Periglacial Processes*, 22(1), 84–100, <https://doi.org/10.1002/ppp.667>, 2011.
- 10 Otto-Bliesner, B.L., Brady, E.C., Zhao, A., Brierley, C.M., Axford, Y., Capron, E., Govin, A., Hoffman, J.S.,  
11 Isaacs, E., Kageyama, M., Scussolini, P., Tzedakis, P.C., Williams, C.J.R., Wolff, E., Abe-Ouchi, A., Braconnot,  
12 P., Ramos Buarque, S., Cao, J., de Vernal, A., Guarino, M.V., Guo, C., LeGrande, A.N., Lohmann, G., Meissner,  
13 K.J., Menviel, L., Morozova, P.A., Nisancioglu, K.H., O'ishi, R., Salas y Méliá, D., Shi, X., Sicard, M., Sime, L.,  
14 Stepanek, C., Tomas, R., Volodin, E., Yeung, N.K.H., Zhang, Q., Zhang, Z., and Zheng, W.: Large-scale features  
15 of LIG climate: results from evaluating the lig127k simulations for the Coupled Model Intercomparison Project  
16 (CMIP6)–Paleoclimate Modeling Intercomparison Project (PMIP4), *Clim. Past*, 17, 63–94,  
17 <https://doi.org/10.5194/cp-17-63-2021>, 2021.
- 18 Overpeck, J.T., Webb, T., and Prentice, I.C.: Quantitative Interpretation of Fossil Pollen Spectra: Dissimilarity  
19 Coefficients and the Method of Modern Analogs, *Quaternary Res.*, 23, 87–108, [https://doi.org/10.1016/0033-  
20 5894\(85\)90074-2](https://doi.org/10.1016/0033-5894(85)90074-2), 1985.
- 21 Parducci, L., Bennett, K.D., Ficetola, G.F., Alsos, I.G., Suyama, Y., Wood, J.R., and Pedersen, M.W.: Ancient  
22 plant DNA in lake sediments, *New Phytol.*, 214, 924–942, <https://doi.org/10.1111/nph.14470>, 2017.
- 23 Petersen, S.V., Winkelstern, I.Z., Lohmann, K.C., and Meyer, K.W.: The effects of Porapak(TM) trap temperature  
24 on  $\delta^{18}\text{O}$ ,  $\delta^{13}\text{C}$ , and  $\Delta_{47}$  values in preparing samples for clumped isotope analysis, *Rapid Communications in Mass  
25 Spectrometry*, 30, 199–208, <https://doi.org/10.1002/rcm.7438>, 2015.
- 26 Pfeiffer, M. and Lohmann, G.: Greenland Ice Sheet influence on LIG climate: global sensitivity studies performed  
27 with an atmosphere–ocean general circulation model, *Clim. Past*, 12, 1313–1338, [https://doi.org/10.5194/cp-12-  
28 1313-2016](https://doi.org/10.5194/cp-12-1313-2016), 2016.
- 29 R Core Team: R: A language and environment for statistical computing. R Foundation for Statistical Computing,  
30 Vienna, Austria, <https://www.R-project.org>, 2022.
- 31 R Core Team: R: A language and environment for statistical computing, R Foundation for Statistical Computing,  
32 Vienna, Austria, <https://www.R-project.org/> (last access: 22 November 2021), <https://www.r-project.org/>, 2020.
- 33 Raberg, J.H., Miller, G.H., Geirsdóttir, Á., and Sepúlveda, J.: Near-universal trends in brGDGT lipid distributions  
34 in nature, *Science Advances*, 8, eabm7625, <https://doi.org/10.1126/sciadv.abm7625>, 2022.
- 35 Rajora, O.P. and Dancik, B.P.: Chloroplast DNA inheritance in *Populus*, *Theor Appl Genet.*, 84(3–4), 280–285,  
36 <https://doi.org/10.1007/BF00229483>, 1992.
- 37 Reyes, A.V., Froese, D.G., and Jensen, B.J.L.: Permafrost response to LIG warming: field evidence from non-



- 1   glaciated Yukon and Alaska. *Quaternary Science Reviews*, 29(23–24), 3256–3274,  
2   <https://doi.org/10.1016/j.quascirev.2010.07.013>, 2010.
- 3   Rovere, A., Raymo, M.E., Vacchi, M., Lorscheid, T., Stocchi, P., Gómez-Pujol, L., Harris, D.L., Casella, E.,  
4   O'Leary, M.J., Hearty, P.J.: The analysis of LIG (MIS 5e) relative sea-level indicators: Reconstructing sea-level  
5   in a warmer world, *Earth-Science Reviews*, 159, 404–427, <https://doi.org/10.1016/j.earscirev.2016.06.006>, 2016.
- 6   Scharf, B.W.: Eutrophication history of Lake Arendsee (Germany), *Palaeogeography, Palaeoclimatology,*  
7   *Palaeoecology*, 140, 85–96, [https://doi.org/10.1016/S0031-0182\(98\)00033-9](https://doi.org/10.1016/S0031-0182(98)00033-9), 1998.
- 8   Schirrneister, L., Grosse, G., Kunitsky, V., Meyer, H., Derevyagin, A., and Kuznetsova, T.: 5.2.10 Oyogos Yar  
9   coast (30.08.), *Reports on Polar and Marine Research*, 466, 247–256, [https://doi.org/10.2312/BzPM\\_0466\\_2003](https://doi.org/10.2312/BzPM_0466_2003),  
10   2003.
- 11   Schirrneister, L. Grosse, G., Wetterich, S., Overduin, Paul, Strauss, J., Schuur E.A.G., and Hubberten, H.-W.:  
12   Fossil organic matter characteristics in permafrost deposits of the Northeast Siberian Arctic, *Journal of*  
13   *Geophysical Research*, 116, G00M02, <https://doi.org/10.1029/2011JG001647>, 2011a.
- 14   Schirrneister, L., Kunitsky, V. V., Grosse, G., Wetterich, S., Meyer, H., Schwamborn, G., Babiy, O., Derevyagin,  
15   A. Y., and Siegert, C.: Sedimentary characteristics and origin of the Late Pleistocene Ice Complex on North-East  
16   Siberian Arctic coastal lowlands and islands - a review, *Quaternary International* 241, 3–25,  
17   <https://doi.org/10.1016/j.quaint.2010.04.004>, 2011b.
- 18   Schirrneister, L., Kunitsky, V., Grosse, V., Meyer, H., Kuznetsova, T., Kuzmina, S., Tumskoy, V., Derevyagin,  
19   A., Akhmadeeva, I., and Syromyatnikov, I.: Quaternary deposits of Bol'shoy Lyakhovsky Island, *Reports on Polar*  
20   *Research*, 354, 113–168, [https://doi.org/10.2312/BzP\\_0354\\_1\\_2000](https://doi.org/10.2312/BzP_0354_1_2000), 2000.
- 21   Schirrneister, L. Oezen, D., and Geyh, M.A.:  $^{230}\text{Th}/\text{U}$  dating of frozen peat, Bol'shoy Lyakhovsky Island (northern  
22   Siberia), *Quaternary Research*, 57, 253–258, <https://doi.org/10.1016/j.margeo.2022.106802>, 2002.
- 23   Schneider, A.: Characteristics of an Eemian thermokarst landscape based on fossil bioindicators from permafrost  
24   deposits at the Dimitri Laptev Strait, northeastern Siberia, Bachelor thesis, Geographical Institute of the Humboldt  
25   University of Berlin (in German), 2010.
- 26   Schwamborn, G. and Wetterich, S.: Russian-German Cooperation CARBOPERM: Field campaigns to Bol'shoy  
27   Lyakhovsky Island in 2014, *Reports on Polar and Marine Research*, 686, 11–19,  
28   [https://doi.org/10.2312/BzPM\\_0686\\_2015](https://doi.org/10.2312/BzPM_0686_2015), 2015.
- 29   Seregin, A.: Moscow University Herbarium (MW). Version 1.288. Lomonosov Moscow State University.  
30   Occurrence dataset. <https://doi.org/10.15468/cpnhcc>, accessed via GBIF.org on 2023-07-10.  
31   <https://www.gbif.org/occurrence/1697205269>, 2023.
- 32   Shackleton, N.J., Sánchez-Goni, M.F., Pailler, D., and Lancelot, Y.: Marine Isotope Substage 5e and the Eemian  
33   Interglacial, *Global and Planetary Change*, 36(3), 151–155, [https://doi.org/10.1016/S0921-8181\(02\)00181-9](https://doi.org/10.1016/S0921-8181(02)00181-9),  
34   2003.
- 35   Shi, X., Werner, M., Krug, C., Brierley, C.M., Zhao, A., Igbinsosa, E., Braconnot, P., Brady, E., Cao, J., D'Agostino,  
36   R., Jungclauss, J., Liu, X., Otto-Bliesner, B., Sidorenko, D., Tomas, R., Volodin, E.M., Yang, H., Zhang, Q., Zheng,  
37   W., and Lohmann, G.: Calendar effects on surface air temperature and precipitation based on model-ensemble

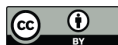

- 1 equilibrium and transient simulations from PMIP4 and PACMEDY. *Clim. Past*, 18, 1047–1070,  
2 <https://doi.org/10.5194/cp-18-1047-2022>, 2022.
- 3 Shur, Y.L. and Jorgenson, M.T.: Patterns of permafrost formation and degradation in relation to climate and  
4 ecosystems. *Permafrost Periglac. Process.*, 18, 7-19. <https://doi.org/10.1002/ppp.582>, 2007.
- 5 Sime, L. C., Sivankutty, R., Vallet-Malmierca, I., de Boer, A. M., and Sicard, M.: Summer surface air temperature  
6 proxies point to near-sea-ice-free conditions in the Arctic at 127 ka, *Clim. Past*, 19, 883-900,  
7 <https://doi.org/10.5194/cp-19-883-2023>, 2023.
- 8 Simpson, G.L.: Analogue Methods in Palaeolimnology, in: *Tracking Environmental Change Using Lake*  
9 *Sediments: Data Handling and Numerical Techniques*, edited by: Birks, H. J. B., Lotter, A. F., Juggins, S., and  
10 Smol, J. P., Springer Netherlands, Dordrecht, 495–522, [https://doi.org/10.1007/978-94-007-2745-8\\_15](https://doi.org/10.1007/978-94-007-2745-8_15), 2012.
- 11 Sinninghe Damsté, J.S.: Spatial heterogeneity of sources of branched tetraethers in shelf systems: The  
12 geochemistry of tetraethers in the Berau River delta (Kalimantan, Indonesia), *Geochimica et Cosmochimica Acta*,  
13 186, 13–31, <https://doi.org/10.1016/j.gca.2016.04.033>, 2016.
- 14 Sjögren, P., van der Knaap, W.O., Huusko, A., and van Leeuwen, J.F.N.: Pollen productivity, dispersal, and  
15 correction factors for major tree taxa in the Swiss Alps based on pollen-trap results, *Rev. Palaeobot. Palynol.*, 152,  
16 200–210, <https://doi.org/10.1016/j.revpalbo.2008.05.003>, 2008.
- 17 Sjögren, P., Edwards, M.E., Gielly, L., Langdon, C.T., Croudace, I.W., Merkel, M.K.F., Fonville, T., and Alsos,  
18 I.G.: Lake sedimentary DNA accurately records 20th Century introductions of exotic conifers in Scotland, *New*  
19 *Phytol*, 213: 929–941, <https://doi.org/10.1111/nph.14199>, 2017.
- 20 Song, B., Zhang, K., Farnsworth, A., Ji, J., Algeo, T. J., Li, X., Xu, Y., and Yang, Y.: Application of ostracod-  
21 based carbonate clumped-isotope thermometry to paleo-elevation reconstruction in a hydrologically complex  
22 setting: A case study from the northern Tibetan Plateau, *Gondwana Research*, 107, 73–83,  
23 <https://doi.org/10.1016/j.gr.2022.02.014>, 2022.
- 24 Stoof-Leichsenring, K.R., Huang, S., Liu, S., Jia, W., Li, K., Liu, X., Pestryakova, L.A., and Herzschuh, U.:  
25 Sedimentary DNA identifies modern and past macrophyte diversity and its environmental drivers in high-latitude  
26 and high-elevation lakes in Siberia and China, *Limnology and Oceanography*, 67(5), 1007-1226,  
27 <https://doi.org/10.1002/lno.12061>, 2022.
- 28 Sutton, B.C., Flanagan, D.J., Gawley, J.R., Newton, C.H., Lester, D.T., and El-Kassaby, Y.A.: Inheritance of  
29 chloroplast and mitochondrial DNA in *Picea* and composition of hybrids from introgression zones, *Theor Appl*  
30 *Genet*, 82(2), 242–248, <https://doi.org/10.1007/BF00226220>, 1991.
- 31 Syrykh L.S., Nazarova L.B., Herzschuh U., Subetto D.A., and Grekov I.M.: Reconstruction of palaeoecological  
32 and palaeoclimatic conditions of the Holocene in the south of Taimyr according to the analysis of lake sediments,  
33 *Contemporary Problems of Ecology* 4, 363–369, <https://doi.org/10.1134/S1995425517040114>, 2017.
- 34 Tumskey, V. and Kuznetsova, T.: Cryolithostratigraphy of the Middle Pleistocene to Holocene deposits in the  
35 Dmitry Laptev Strait, Northern Yakutia. *Front. Earth Sci.*, 10, 789421. <https://doi.org/10.3389/feart.2022.789421>,  
36 2022.
- 37 Tumskey, V.: Peculiarities of cryolithogenesis in Northern Yakutia (middle Neopleistocene to Holocene),



- 1 Kriosfera Zemli 16(1), 12–21, (in Russian), 2012.
- 2 Vaks, A., Mason, A.J., Breitenbach, S.F.M., Kononov, A.M., Osinzev, A.V., Rosensaft, M., Borshevsky, A.,  
3 Gutareva, O.S., and Henderson, G.M.: Palaeoclimate evidence of vulnerable permafrost during times of low sea  
4 ice, *Nature*, 577, 221–225, <https://doi.org/10.1038/s41586-019-1880-1>, 2020.
- 5 Vaks, A., Gutareva, O.S., Breitenbach, S.F.M., Avirmed, E., Mason, A.J., Thomas, A.L., Osinzev, A.V., Kononov,  
6 A.M., and Henderson, G.M.: Speleothems reveal 500,000-year history of Siberian permafrost, *Science*, 340, 6129,  
7 183–186. <https://doi.org/10.1126/science.1228729>, 2013.
- 8 van Everdingen, R.O. (ed.). Multi-Language Glossary of Permafrost and Related Ground-Ice Terms, International  
9 Permafrost Association (1998, revised 2005), The Arctic Institute of North America, The University of Calgary  
10 Printing Services, Calgary, Canada, 159 pp., 2005.
- 11 van Nieuwenhove N., Bauch, H.A., Eynaud, F., Kandiano, E., Cortijo, E., and Turan, J.-L.: Evidence for delayed  
12 poleward expansion of North Atlantic surface waters during the LIG (MIS 5e), *Quaternary Science Reviews*, 30,  
13 934–946, <https://doi.org/10.1016/j.quascirev.2011.01.013>, 2011.
- 14 van Geel, B., Protopopov, A., Protopopova, V., Pavlov, I., van der Plicht, J., and van Reenen, G.B.A.: *Larix* during  
15 the Mid-Pleniglacial (Greenland Interstadial 8) on Kotelny Island, northern Siberia, *Boreas*, 46, 338–345,  
16 <https://doi.org/10.1111/bor.12216>, 2017.
- 17 Velichko, A.A., Borisova, O.K., and Zelikson, E.M.: Paradoxes of the LIG climate: reconstruction of the northern  
18 Eurasia climate based on palaeofloristic data, *Boreas*, 37, 1–19. <https://doi.org/10.1111/j.1502-3885.2007.00001.x>,  
19 2008.
- 20 Vermassen, F., O'Regan, M., de Boer, A., Schenk, F., Razmjooei, M., West, G., Cronin, T. M., Jakobsson, M.,  
21 and Coxall, H. K.: A seasonally ice-free Arctic Ocean during the LIG, *Nat. Geosci.*, 16, 723–729,  
22 <http://doi.org/10.1038/s41561-023-01227-x>, 2023.
- 23 von Grafenstein, U., Erlenkeuser, H., and Trimborn, P.: Oxygen and carbon isotopes in modern fresh-water  
24 ostracod valves: Assessing vital offsets and autecological effects of interest for palaeoclimate studies,  
25 *Palaeogeography Palaeoclimatology Palaeoecology*, 148, 133–152, [https://doi.org/10.1016/S0031-  
26 0182\(98\)00180-1](https://doi.org/10.1016/S0031-0182(98)00180-1), 1999.
- 27 Walter Anthony, K., Zimov, S., Grosse, G., Jones, M.C., Anthony, P.M., Chapin III, F.S., Finlay, J.C., Mack,  
28 M.C., Davydov, S., Frenzel, P., and Frohking, S.: A shift of thermokarst lakes from carbon sources to sinks during  
29 the Holocene epoch. *Nature* 511, 452–456 (2014). <https://doi.org/10.1038/nature13560>, 2014.
- 30 Wang, C., Graham, R. M., Wang, K., Gerland, S., and Granskog, M.A.: Comparison of ERA5 and ERA-Interim  
31 near-surface air temperature, snowfall and precipitation over Arctic sea ice: effects on sea ice thermodynamics and  
32 evolution, *The Cryosphere*, 13, 1661–1679, <https://doi.org/10.5194/tc-13-1661-2019>, 2019.
- 33 Wetterich, S., Meyer, H., Fritz, M., Mollenhauer, G., Rethemeyer, J., Kizyakov, A., Schirrmeister, L., and Opel,  
34 T.: Northeast Siberian permafrost ice-wedge stable isotopes depict pronounced Last Glacial Maximum winter  
35 cooling, *Geophysical Research Letters*, 48, e2020GL092087, <https://doi.org/10.1029/2020GL092087>, 2021.
- 36 Wetterich, S., Rudaya, N., Kuznetsov, V., Maksimov, F., Opel, T., Meyer, H., Günther, F., Bobrov, A., Raschke,  
37 E., Zimmermann, H.H., Strauss, J., Starikova, A., Fuchs, M., Schirrmeister, L.: Ice Complex formation on Bol'shoy





- 1 Lyakhovsky Island (New Siberian Archipelago, East Siberian Arctic) since about 200 ka, *Quaternary Research*,  
2 92(2), 530–548. <https://doi.org/10.1017/qua.2019.6>, 2019.
- 3 Wetterich S., Schirrneister L., Nazarova L., Palagushkina O., Bobrov A., Pogosyan L., Savelieva L., Syrykh L.,  
4 Matthes H., Fritz M., Gunther F., and Opel T.: Holocene thermokarst and pingo development in the Kolyma  
5 Lowland 1 (NE Siberia), *Permafrost and Periglacial Processes*, 29(3), 182–198,  
6 <https://doi.org/10.1002/ppp.1979>, 2018.
- 7 Wetterich, S.; Tumskey, V.E., Rudaya, N., Kuznetsov, V., Maksimov, F., Opel T., Meyer H., Andreev, A.A., and  
8 Schirrneister, L.: Ice Complex permafrost of MIS5 age in the Dmitry Laptev Strait coastal region (East Siberian  
9 Arctic), *Quaternary Science Reviews*, 147, 298–311, <https://doi.org/10.1016/j.quascirev.2015.11.016>, 2016.
- 10 Wetterich, S., Rudaya, N., Andreev, A.A., Opel, T., Schirrneister, L., Meyer, H., and Tumskey, V.: Ice Complex  
11 formation in arctic East Siberia during the MIS3 Interstadial. *Quaternary Science Reviews*, 84, 39–55.  
12 <https://doi.org/10.1016/j.quascirev.2013.11.009>, 2014.
- 13 Wetterich, S., Schirrneister, L., Andreev, A.A., Pudenz, M., Plessen, B., Meyer, H., and Kunitsky, V.V.: Eemian  
14 and Late Glacial/Holocene palaeoenvironmental records from permafrost sequences at the Dmitry Laptev Strait  
15 (NE Siberia, Russia), *Palaeogeography, Palaeoclimatology, Palaeoecology*, 279, 73–95  
16 <https://doi.org/10.1016/j.palaeo.2009.05.002>, 2009.
- 17 Wetterich, S., Schirrneister, L., Meyer, H., Viehberg, F.A., and Mackensen, A.: Arctic freshwater ostracods from  
18 modern periglacial environments in the Lena River Delta (Siberian Arctic, Russia): Geochemical applications for  
19 palaeoenvironmental reconstructions, *Journal of Paleolimnology*, 39(4), 427–449, [https://doi.org/10.1007/s10933-](https://doi.org/10.1007/s10933-007-9122-1)  
20 [007-9122-1](https://doi.org/10.1007/s10933-007-9122-1), 2008a.
- 21 Wetterich, S., Herzsuh, U., Meyer, H., Pstryakova, L., Plessen, B., Lopez, C.M.L., and Schirrneister, L.:  
22 Evaporation effects as reflected in freshwaters and ostracod calcite from modern environments in Central and  
23 Northeast Yakutia (East Siberia, Russia), *Hydrobiologia*, 614(1), 171–195, [https://doi.org/10.1007/s10750-008-](https://doi.org/10.1007/s10750-008-9505-y)  
24 [9505-y](https://doi.org/10.1007/s10750-008-9505-y), 2008b.
- 25 Wickham, H.: *ggplot2: Elegant Graphics for Data Analysis*, Springer New York, 260 pp., 2016.
- 26 White, R.E.: *Principles and Practice of Soil Science: The Soil as a Natural Resource*, 4th Edition, 384 pp., Wiley-  
27 Blackwell, Malden, Mass., ISBN: 978-0-632-06455-7, 2005.
- 28 Wilcox, E.J., Wolfe, B.B., and Marsh, P.: Assessing the influence of lake and watershed attributes on snowmelt  
29 bypass at thermokarst lakes, *Hydrology and Earth System Sciences*, 26, 6185–6205,  
30 <https://hess.copernicus.org/articles/26/6185/2022/>, 2022.
- 31 Xia, J., Engstrom, D.R., and Ito, E.: Geochemistry of ostracode calcite 2: effects of the water chemistry and  
32 seasonal temperature variation on *Candona rawsoni*, *Geochimica et Cosmochimica Acta*, 61, 383–391,  
33 [https://doi.org/10.1016/S0016-7037\(96\)00354-7](https://doi.org/10.1016/S0016-7037(96)00354-7), 1997.
- 34 Xu, S., Krebs-Kanzow, U., and Lohmann, G.: Arctic Amplification during the Last Glacial Inception due to a  
35 delayed response in sea ice and surface temperature. *Geophys. Res. Lettters* 51, e2023GL107927  
36 <https://doi.org/10.1029/2023GL107927>, 2024.



- 1 Xie, J., Pancost, R.D., Chen, L., Evershed, R.P., Yang, H., Zhang, K., Huang, J., and Xu, Y.: Microbial lipid  
2 records of highly alkaline deposits and enhanced aridity associated with significant uplift of the Tibetan Plateau in  
3 the Late Miocene, *Geology*, 40, 291-294, <https://doi.org/10.1130/G32570.1>, 2012.
- 4 Yang, H., Lü, X., Ding, W., Lei, Y., Dang, X., and Xie, S.: The 6-methyl branched tetraethers significantly affect  
5 the performance of the methylation index (MBT) in soils from an altitudinal transect at Mount Shennongjia,  
6 *Organic Geochemistry*, 82, 42-53, <https://doi.org/10.1016/j.orggeochem.2015.02.003>, 2015.
- 7 Zimmermann, H.H., Raschke, E., Epp, L.S., Stoof-Leichsenring, K.R., Schirmermeister, L., Schwamborn, G., and  
8 Herzschuh, U.: The history of tree and shrub taxa on Bol'shoi Lyakhovskiy Island (New Siberian Archipelago)  
9 since the LIG uncovered by sedimentary ancient DNA and pollen data, *Genes* 8(10), E273,  
10 <https://doi.org/10.3390/genes8100273>, 201

11

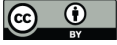

1

2 **Appendix A**

3 Table A1 Overview of sample collections for cryolithological and fossil proxy studies of Krest Yuryakh deposits  
4 exposed at both coasts of the Dmitry Laptev Strait



| Profile                           | Location number in Table | Year | Coordinates °N, °E      | Height [m asl] | Deposits type | cryo-lithology | Pollen,                                                    | Seta/DNA | Plant macro-fossils     | Chironomids     | Additional bioindicators, clumped isotopes, and IRSL-dated samples                                     | Ostracods         | References                                                                                                                                                                           |
|-----------------------------------|--------------------------|------|-------------------------|----------------|---------------|----------------|------------------------------------------------------------|----------|-------------------------|-----------------|--------------------------------------------------------------------------------------------------------|-------------------|--------------------------------------------------------------------------------------------------------------------------------------------------------------------------------------|
| <b>Bol'shoy Lyakhovsky Island</b> |                          |      |                         |                |               |                |                                                            |          |                         |                 |                                                                                                        |                   |                                                                                                                                                                                      |
| R22+60 (R22)                      | 1                        | 1999 | 73.339000<br>141.295100 | 1-4.8          | pseudo-morph  | x              | R22+60 S-5, S-6, S-8, r2260s5_80, r22os54_200, r22os53_230 |          | R22 OS-53, OS-54, OS-55 |                 | beetles and other small fossils, R22 B15 h=2.5-2.8 m (OS-53, OS-54); B16 h=4 m (OS-55); R22+30 BL-R-M2 |                   | Schirrneister et al. (2000); Andreev et al. (2004); Kienast et al. (2008); <a href="https://doi.pangaea.de/10.1594/PANGAEA.880948">https://doi.pangaea.de/10.1594/PANGAEA.880948</a> |
| R23+40                            | 2                        | 1999 | 73.339400<br>141.292500 | 1.8-7.3        | lake deposits | x              | R23+40 S-1 to S-7                                          |          |                         |                 | <i>Pisidium</i> sp. shell R23+40-10                                                                    | R23+40-S1, -4, -9 | Schirrneister et al. (2000); Andreev et al. (2009); <a href="https://doi.pangaea.de/10.1594/PANGAEA.880949">https://doi.pangaea.de/10.1594/PANGAEA.880949</a>                        |
| R32                               |                          | 1999 | 73.344863<br>141.265733 |                | lake deposits |                |                                                            |          |                         |                 | R 32 mollusks BL-R-M4                                                                                  |                   | Schirrneister et al. (2000)                                                                                                                                                          |
| R35                               | 3                        | 1999 | 73.345898<br>141.261696 | 1-5.2          | pseudo-morph  |                | R35 S-1 to S-11                                            |          | R35 S-9                 | R35 S-1 to S-11 |                                                                                                        |                   | Schirrneister et al. (2000); Ilyashuk et al. (2006); Kienast et al. (2008)                                                                                                           |
| L11+40                            | 4                        | 1999 | 73.32330<br>141.38650   | 0.5-4.3        | lake deposits | x              | L11+40 S-1 to S-10<br><br>OS-56, OS-57, OS-60              |          | OS-56, OS-57, OS-60     | OS-56, OS-57    | beetles and other small animals B-17 h=4-4.3 (OS-56, OS-57); B-19 h=7-7.3 (OS-60, OS-61)               | L11-S-6           | Schirrneister et al. (2000); Kienast et al. (2008); Andreev et al. (2009); <a href="https://doi.pangaea.de/10.1594/PANGAEA.880935">https://doi.pangaea.de/10.1594/PANGAEA.880935</a> |
| L13+80                            | 6                        | 1999 | 73.322300<br>141.393200 | 5-6.3          | lake deposits | x              |                                                            |          |                         |                 |                                                                                                        |                   | Schirrneister et al. (2000); <a href="https://doi.org/10.15194/PANGAEA.880936">https://doi.org/10.15194/PANGAEA.880936</a>                                                           |



|                         |    |      |                         |                        |                  |   |                                                          |                                            |                     |                                                                  |                    |                                                                                                                                                                                                                                                     |
|-------------------------|----|------|-------------------------|------------------------|------------------|---|----------------------------------------------------------|--------------------------------------------|---------------------|------------------------------------------------------------------|--------------------|-----------------------------------------------------------------------------------------------------------------------------------------------------------------------------------------------------------------------------------------------------|
| L14                     | 7  | 1999 | 73.322200<br>141.393800 | 3-5.4                  | pseudo-morph     | x | L14 S-1,<br>S-2                                          |                                            |                     |                                                                  |                    | Schirrmeister et al. (2000); Andreev et al. (2004);<br><a href="https://doi.pangaea.de/10.1594/PANGAEA.880937">https://doi.pangaea.de/10.1594/PANGAEA.880937</a>                                                                                    |
| L7-11 A                 | 8  | 2007 | 73.31672<br>141.42628   | 4-5.4                  | pseudo-morph     | x |                                                          |                                            | L7-11-07<br>to -12  | Insects,<br>daphnia,<br>moss                                     | L7-11-07<br>to -12 | Boike et al. (2008);<br>Schneider (2010);<br><a href="https://doi.pangaea.de/10.1594/PANGAEA.727667">https://doi.pangaea.de/10.1594/PANGAEA.727667</a>                                                                                              |
| L7-14 B-C               | 9  | 2007 | 73.2877<br>141.69097    | 2.5-5                  | pseudo-morph     | x | L7-14-04<br>to -15                                       |                                            |                     |                                                                  | L7-14-04<br>to -15 | Wetterich et al. (2009); Boike et al. (2008);<br><a href="https://doi.pangaea.de/10.1594/PANGAEA.727669">https://doi.pangaea.de/10.1594/PANGAEA.727669</a>                                                                                          |
| L7-16                   | 10 | 2007 | 73.31385<br>141.4505    | 4.5-7                  | pseudo-morph     | x |                                                          |                                            |                     |                                                                  |                    | Boike et al. (2008);<br><a href="https://doi.pangaea.de/10.1594/PANGAEA.727669">https://doi.pangaea.de/10.1594/PANGAEA.727669</a>                                                                                                                   |
| L14-04                  | 11 | 2014 | 73.34100<br>141.28586   | 3.9-12<br>core         | lake<br>deposits | x | L14-03<br>6.73 to<br>12.87,<br>L14.04<br>6.15 to<br>8.03 | L14.0<br>4<br>6.15<br>to<br>8.03           |                     | GDGT                                                             |                    | Zimmermann et al. (2017);<br><a href="https://doi.pangaea.de/10.1594/PANGAEA.868983">https://doi.pangaea.de/10.1594/PANGAEA.868983</a><br><a href="https://doi.pangaea.de/10.1594/PANGAEA.878884">https://doi.pangaea.de/10.1594/PANGAEA.878884</a> |
| L14-04 B                | 11 | 2014 | 73.34100<br>141.28586   | 0.6-<br>5.0<br>outcrop | lake<br>deposits | x |                                                          | L14-<br>04B<br>2.45,<br>3.45               |                     | GDGT                                                             |                    | Zimmermann et al. (2017)                                                                                                                                                                                                                            |
| L14-04 C                | 11 | 2014 | 73.34100<br>141.28586   | 2.5-<br>7.5<br>outcrop | lake<br>deposits | x | L14-04C<br>2.55 to<br>4.45                               | L14-<br>04C<br>2.55<br>to<br>4.45[<br>LS3] |                     | GDGT                                                             |                    | Schwaborn and<br>Wetterich (2015);<br>Zimmermann et al. (2017)                                                                                                                                                                                      |
| L14-12                  | 12 | 2014 | 73.34055<br>141.28498   | 3-7                    | lake<br>deposits |   |                                                          |                                            |                     | IR-OSL:<br>L14-12-<br>OSL3,<br>L14-12-<br>OSL1                   |                    | Schwaborn and<br>Wetterich (2015);<br>this study                                                                                                                                                                                                    |
| <b>Oyogos Yar coast</b> |    |      |                         |                        |                  |   |                                                          |                                            |                     |                                                                  |                    |                                                                                                                                                                                                                                                     |
| Oya 3                   | 13 | 2002 | 72.679317<br>143.551417 | 1-4                    | pseudo-morph     | x |                                                          |                                            |                     |                                                                  |                    | Grigoriev et al. (2003)                                                                                                                                                                                                                             |
| Oya 5-1                 | 14 | 2002 | 72.68000<br>143.53000   | 3.5                    | pseudo-morph     | x | Oya 5-1                                                  | Oya 5-1                                    | Oya 5-1             | beetles,<br>cladocera<br>ns,<br>molluscs,<br>clumped<br>isotopes | Oya 5-1            | Grigoriev et al. (2003); Kienast et al. (2011)                                                                                                                                                                                                      |
| Oy7-01 A-C              | 15 | 2007 | 72.67454<br>143.60981   | 1-2.5                  | lake<br>deposits | x |                                                          |                                            | Oy7-01-<br>01 to 13 | Insects,<br>Daphnia,<br>moss,<br>mollusks                        | Oy7-01-01<br>to 13 | Schneider (2010);<br><a href="https://doi.pangaea.de/10.1594/PANGAEA.727673">https://doi.pangaea.de/10.1594/PANGAEA.727673</a>                                                                                                                      |



|            |    |      |                       |     |               |   |                 |  |  |  |  |  |  |  |  |  |  |  |  |                                                                                                                                   |
|------------|----|------|-----------------------|-----|---------------|---|-----------------|--|--|--|--|--|--|--|--|--|--|--|--|-----------------------------------------------------------------------------------------------------------------------------------|
| Oy7-07 B   | 16 | 2007 | 72.67865<br>143.55718 | 5-6 | lake deposits | x |                 |  |  |  |  |  |  |  |  |  |  |  |  | Boike et al. (2008);<br><a href="https://doi.pangaea.de/10.1594/PANGAEA.727676">https://doi.pangaea.de/10.1594/PANGAEA.727676</a> |
| Oy7-08 A-B | 17 | 2007 | 72.68002<br>143.53181 | 2-6 | pseudo-morph  | x | Oy7-08-02 to 24 |  |  |  |  |  |  |  |  |  |  |  |  | Oy7-08-02 to 24<br>Wetterich et al. (2009); Opel et al. (2017)                                                                    |

1

2
